# Supplementary material for: Crown-of-thorns starfish spines secrete defence proteins
Source: PeerJ. 2023 Aug 21;11:e15689. doi: 10.7717/peerj.15689 (PMC10448888; doi:10.7717/peerj.15689)
Supplement: Table S1 [file peerj-11-15689-s001.xlsx]

## Sheet: Protien Measurement
Sample ID	Protein	Unit	A280 (Abs)	260/280	Sample Type		Stock solutions ug/mL	Solution concentration in well
COTS SPINES 14mL 110 FILTERED	0.189	mg/ml	0.189	1.3	1 Abs = 1 mg / mL
COTS SPINES 14mL 110 FILTERED	0.227	mg/ml	0.227	1.3	1 Abs = 1 mg / mL		COTS SPINES 14mL 110 FILTERED
COTS SPINES 14mL 110 FILTERED	0.248	mg/ml	0.248	1.26	1 Abs = 1 mg / mL		221.333	110.667
COTS STRESSED WATER 32mL 110 FILTERED	0.188	mg/ml	0.188	2.51	1 Abs = 1 mg / mL
COTS STRESSED WATER 32mL 110 FILTERED	0.223	mg/ml	0.223	2.27	1 Abs = 1 mg / mL		COTS STRESSED WATER 32mL 110 FILTERED
COTS STRESSED WATER 32mL 110 FILTERED	0.23	mg/ml	0.23	2.36	1 Abs = 1 mg / mL		213.667	106.833
COTS SPINES 4.8mL LESS THAN 10KDA	0.084	mg/ml	0.084	1.23	1 Abs = 1 mg / mL
COTS SPINES 4.8mL LESS THAN 10KDA	0.075	mg/ml	0.075	1.29	1 Abs = 1 mg / mL		COTS SPINES 4.8mL LESS THAN 10KDA
COTS SPINES 4.8mL LESS THAN 10KDA	0.11	mg/ml	0.11	1.19	1 Abs = 1 mg / mL		89.6667	44.8333
COTS SPINES 9.0mL MORE THAN 10KDA	0.176	mg/ml	0.176	1.19	1 Abs = 1 mg / mL
COTS SPINES 9.0mL MORE THAN 10KDA	0.191	mg/ml	0.191	1.19	1 Abs = 1 mg / mL		COTS SPINES 9.0mL MORE THAN 10KDA
COTS SPINES 9.0mL MORE THAN 10KDA	0.193	mg/ml	0.193	1.2	1 Abs = 1 mg / mL		186.667	93.3333
COTS STRESSED WATER 4.6 mL LESS THAN 10KDA	0.02	mg/ml	0.02	1.15	1 Abs = 1 mg / mL
COTS STRESSED WATER 4.6 mL LESS THAN 10KDA	0.029	mg/ml	0.029	0.85	1 Abs = 1 mg / mL		COTS STRESSED WATER 4.6 mL LESS THAN 10KDA
COTS STRESSED WATER 4.6 mL LESS THAN 10KDA	0.011	mg/ml	0.011	1.43	1 Abs = 1 mg / mL		20	10
COTS STRESSED WATER 9.1 mL MORE THAN 10KDA	0.203	mg/ml	0.203	2.3	1 Abs = 1 mg / mL
COTS STRESSED WATER 9.1 mL MORE THAN 10KDA	0.197	mg/ml	0.197	2.27	1 Abs = 1 mg / mL		COTS STRESSED WATER 9.1 mL MORE THAN 10KDA
COTS STRESSED WATER 9.1 mL MORE THAN 10KDA	0.189	mg/ml	0.189	2.39	1 Abs = 1 mg / mL		196.333	98.1667

## Sheet: Bioassay Raw Data
FRACTION	SPSS NAME	CONC IN WELL	PLATE	WELL	ALIVE 0 H	ALIVE 1 H	ALIVE 24 H	ALIVE 48 H	percent dead	Dilution	Renamed	Mortality at 48 h	%Mortality at 48 h					Original concentration	dilute 1/10	dilute 1/100
COTS WHOLE VENOM	V110	110ug/mL	1	A1	13	11	11	7	46.1538	original	Crude spine venom	6	46.1538				CONTROL SEA WATER
COTS WHOLE VENOM	V110	110ug/mL	1	A2	10	10	9	3	70			7	70					0
COTS WHOLE VENOM	V110	110ug/mL	1	A3	12	12	11	4	66.6667			8	66.6667					7.14286
COTS WHOLE VENOM	V110	110ug/mL	1	A4	11	11	11	7	36.3636			4	36.3636					5
COTS WHOLE VENOM	V110	110ug/mL	1	A5	11	11	10	6	45.4545			5	45.4545					0
COTS WHOLE VENOM	V11	11.0ug/mL	1	B1	13	13	13	12	7.69231	01:10:00		1	7.69231					5.26316
COTS WHOLE VENOM	V11	11.0ug/mL	1	B2	11	11	11	11	0			0	0				COTS WHOLE VENOM	110ug/mL	11.0ug/mL	1.1ug/mL		Crude stressed COTS-conditioned water
COTS WHOLE VENOM	V11	11.0ug/mL	1	B3	10	10	10	10	0			0	0				%mortality (5 rep/each)	46.1538	7.69231	0
COTS WHOLE VENOM	V11	11.0ug/mL	1	B4	17	17	17	15	11.7647			2	11.7647					70	0	6.66667
COTS WHOLE VENOM	V11	11.0ug/mL	1	B5	20	20	20	19	5			1	5					66.6667	0	5
COTS WHOLE VENOM	V1.1	1.1ug/mL	1	C1	13	13	13	13	0	1:100		0	0					36.3636	11.7647	0
COTS WHOLE VENOM	V1.1	1.1ug/mL	1	C2	15	15	15	14	6.66667			1	6.66667					45.4545	5	5
COTS WHOLE VENOM	V1.1	1.1ug/mL	1	C3	20	20	20	19	5			1	5				COTS VENOM <10KDa	44.8ug/mL	4.48ug/mL	0.448ug/mL
COTS WHOLE VENOM	V1.1	1.1ug/mL	1	C4	12	12	12	12	0			0	0					0	0	0
COTS WHOLE VENOM	V1.1	1.1ug/mL	1	C5	20	20	20	19	5			1	5					0	0	0					Crude spine venom, 110 µg/mL
COTS WHOLE STRESSED WATER	W107	107ug/mL	1	D1	17	17	12	1	94.1176	original		16	94.1176					0	9.09091	5					Crude spine venom, 11.0 µg/mL
COTS WHOLE STRESSED WATER	W107	107ug/mL	1	D2	10	10	5	1	90			9	90					10	7.14286	6.66667					Crude spine venom, 1.10 µg/mL
COTS WHOLE STRESSED WATER	W107	107ug/mL	1	D3	12	12	7	0	100			12	100					5	0	0					<10kDa Spine venom, 44.8 µg/mL
COTS WHOLE STRESSED WATER	W107	107ug/mL	1	D4	13	13	8	3	76.9231			10	76.9231				COTS VENOM >10KDa	93.3ug/mL	9.33ug/mL	0.933ug/mL					<10kDa Spine venom, 4.48 µg/mL
COTS WHOLE STRESSED WATER	W107	107ug/mL	1	D5	10	10	8	2	80			8	80					41.1765	0	0					<10kDa Spine venom, 0.448 µg/mL
COTS WHOLE STRESSED WATER	W10.7	10.7ug/mL	1	E1	20	20	19	8	60	01:10:00		12	60					70	0	6.66667					>10kDa Spine venom, 93.3 µg/mL
COTS WHOLE STRESSED WATER	W10.7	10.7ug/mL	1	E2	18	18	17	7	61.1111			11	61.1111					45.4545	7.69231	0					>10kDa Spine venom, 9.33 µg/mL
COTS WHOLE STRESSED WATER	W10.7	10.7ug/mL	1	E3	12	12	12	7	41.6667			5	41.6667					60	0	0					>10kDa Spine venom, 0.933 µg/mL
COTS WHOLE STRESSED WATER	W10.7	10.7ug/mL	1	E4	20	20	20	13	35			7	35					40	7.69231	8.33333					Crude stressed COTS-conditioned water, 107 µg/mL
COTS WHOLE STRESSED WATER	W10.7	10.7ug/mL	1	E5	19	19	19	9	52.6316			10	52.6316				COTS WHOLE STRESSED WATER	107ug/mL	10.7ug/mL	1.07ug/mL					Crude stressed COTS-conditioned water, 10.7 µg/mL
COTS WHOLE STRESSED WATER	W1.07	1.07ug/mL	1	F1	14	14	14	14	0	1:100		0	0					94.1176	60	0					Crude stressed COTS-conditioned water, 1.07 µg/mL
COTS WHOLE STRESSED WATER	W1.07	1.07ug/mL	1	F2	10	10	10	10	0			0	0					90	61.1111	0					<10 kDa stressed COTS-conditioned water, 10 µg/mL
COTS WHOLE STRESSED WATER	W1.07	1.07ug/mL	1	F3	10	10	10	9	10			1	10					100	41.6667	10					<10 kDa stressed COTS-conditioned water, 1.0 µg/mL
COTS WHOLE STRESSED WATER	W1.07	1.07ug/mL	1	F4	12	12	12	12	0			0	0					76.9231	35	0					<10 kDa stressed COTS-conditioned water, 0.10 µg/mL
COTS WHOLE STRESSED WATER	W1.07	1.07ug/mL	1	F5	11	11	11	10	9.09091			1	9.09091					80	52.6316	9.09091					>10 kDa stressed COTS-conditioned water, 98.2 µg/mL
COTS STRESSED WATER >10KDa	>W98.2	98.2ug/mL	1	G1	12	12	8	4	66.6667	original		8	66.6667				COTS STRESSED WATER <10KDa	10ug/mL	1ug/mL	0.1ug/mL					>10 kDa stressed COTS-conditioned water, 9.82 µg/mL
COTS STRESSED WATER >10KDa	>W98.2	98.2ug/mL	1	G2	10	10	5	2	80			8	80					70.5882	9.09091	5					>10 kDa stressed COTS-conditioned water, 0.982 µg/mL
COTS STRESSED WATER >10KDa	>W98.2	98.2ug/mL	1	G3	11	11	5	1	90.9091			10	90.9091					70	6.66667	6.25
COTS STRESSED WATER >10KDa	>W98.2	98.2ug/mL	1	G4	20	20	14	4	80			16	80					33.3333	7.14286	0
COTS STRESSED WATER >10KDa	>W98.2	98.2ug/mL	1	G5	10	10	6	1	90			9	90					35.7143	10	5.88235
COTS STRESSED WATER >10KDa	>W9.82	9.82ug/mL	1	H1	12	12	12	10	16.6667	01:10:00		2	16.6667					47.3684	10	0
COTS STRESSED WATER >10KDa	>W9.82	9.82ug/mL	1	H2	10	10	10	9	10			1	10				COTS STRESSED WATER >10KDa	98.2ug/mL	9.82ug/mL	0.982ug/mL
COTS STRESSED WATER >10KDa	>W9.82	9.82ug/mL	1	H3	10	10	10	8	20			2	20					66.6667	16.6667	5.26316
COTS STRESSED WATER >10KDa	>W9.82	9.82ug/mL	1	H4	20	20	20	17	15			3	15					80	10	0
COTS STRESSED WATER >10KDa	>W9.82	9.82ug/mL	1	H5	11	11	11	10	9.09091			1	9.09091					90.9091	20	5.55556
COTS STRESSED WATER >10KDa	>W0.982	0.982ug/mL	2	A1	19	19	19	18	5.26316	1:100		1	5.26316					80	15	0
COTS STRESSED WATER >10KDa	>W0.982	0.982ug/mL	2	A2	10	10	10	10	0			0	0					90	9.09091	0
COTS STRESSED WATER >10KDa	>W0.982	0.982ug/mL	2	A3	18	18	18	17	5.55556			1	5.55556
COTS STRESSED WATER >10KDa	>W0.982	0.982ug/mL	2	A4	14	14	14	14	0			0	0
COTS STRESSED WATER >10KDa	>W0.982	0.982ug/mL	2	A5	11	11	11	11	0			0	0
COTS VENOM >10KDa	>V93.3	93.3ug/mL	2	B1	17	17	17	10	41.1765	original		7	41.1765
COTS VENOM >10KDa	>V93.3	93.3ug/mL	2	B2	20	20	19	6	70			14	70
COTS VENOM >10KDa	>V93.3	93.3ug/mL	2	B3	11	11	11	6	45.4545			5	45.4545
COTS VENOM >10KDa	>V93.3	93.3ug/mL	2	B4	10	10	9	4	60			6	60
COTS VENOM >10KDa	>V93.3	93.3ug/mL	2	B5	10	10	10	6	40			4	40
COTS VENOM >10KDa	>V9.33	9.33ug/mL	2	C1	19	19	19	19	0	01:10:00		0	0
COTS VENOM >10KDa	>V9.33	9.33ug/mL	2	C2	14	14	14	14	0			0	0
COTS VENOM >10KDa	>V9.33	9.33ug/mL	2	C3	13	13	13	12	7.69231			1	7.69231
COTS VENOM >10KDa	>V9.33	9.33ug/mL	2	C4	10	10	10	10	0			0	0
COTS VENOM >10KDa	>V9.33	9.33ug/mL	2	C5	13	13	13	12	7.69231			1	7.69231
COTS VENOM >10KDa	>V0.933	0.933ug/mL	2	D1	18	18	18	18	0	1:100		0	0
COTS VENOM >10KDa	>V0.933	0.933ug/mL	2	D2	15	15	15	14	6.66667			1	6.66667
COTS VENOM >10KDa	>V0.933	0.933ug/mL	2	D3	10	10	10	10	0			0	0
COTS VENOM >10KDa	>V0.933	0.933ug/mL	2	D4	18	18	18	18	0			0	0
COTS VENOM >10KDa	>V0.933	0.933ug/mL	2	D5	12	12	12	11	8.33333			1	8.33333
COTS VENOM <10KDa	<V44.8	44.8ug/mL	2	E1	14	14	14	14	0	original		0	0
COTS VENOM <10KDa	<V44.8	44.8ug/mL	2	E2	11	11	11	11	0			0	0
COTS VENOM <10KDa	<V44.8	44.8ug/mL	2	E3	19	19	19	19	0			0	0
COTS VENOM <10KDa	<V44.8	44.8ug/mL	2	E4	10	10	10	9	10			1	10
COTS VENOM <10KDa	<V44.8	44.8ug/mL	2	E5	20	20	20	19	5			1	5
COTS VENOM <10KDa	<V4.48	4.48ug/mL	2	F1	14	14	14	14	0	01:10:00		0	0
COTS VENOM <10KDa	<V4.48	4.48ug/mL	2	F2	13	13	13	13	0			0	0
COTS VENOM <10KDa	<V4.48	4.48ug/mL	2	F3	11	11	11	10	9.09091			1	9.09091
COTS VENOM <10KDa	<V4.48	4.48ug/mL	2	F4	14	14	14	13	7.14286			1	7.14286
COTS VENOM <10KDa	<V4.48	4.48ug/mL	2	F5	10	10	10	10	0			0	0
COTS VENOM <10KDa	<V0.448	0.448ug/mL	2	G1	19	19	19	19	0	1:100		0	0
COTS VENOM <10KDa	<V0.448	0.448ug/mL	2	G2	17	17	17	17	0			0	0
COTS VENOM <10KDa	<V0.448	0.448ug/mL	2	G3	20	20	20	19	5			1	5
COTS VENOM <10KDa	<V0.448	0.448ug/mL	2	G4	15	15	15	14	6.66667			1	6.66667
COTS VENOM <10KDa	<V0.448	0.448ug/mL	2	G5	11	11	11	11	0			0	0
COTS STRESSED WATER >10KDa	<W10	10ug/mL	3	A1	17	17	16	5	70.5882	original		12	70.5882
COTS STRESSED WATER >10KDa	<W10	10ug/mL	3	A2	10	10	10	3	70			7	70
COTS STRESSED WATER >10KDa	<W10	10ug/mL	3	A3	12	12	12	8	33.3333			4	33.3333
COTS STRESSED WATER >10KDa	<W10	10ug/mL	3	A4	14	14	14	9	35.7143			5	35.7143
COTS STRESSED WATER >10KDa	<W10	10ug/mL	3	A5	19	19	18	10	47.3684			9	47.3684
COTS STRESSED WATER >10KDa	<W1	1ug/mL	3	B1	11	11	11	10	9.09091	01:10:00		1	9.09091
COTS STRESSED WATER >10KDa	<W1	1ug/mL	3	B2	15	15	15	14	6.66667			1	6.66667
COTS STRESSED WATER >10KDa	<W1	1ug/mL	3	B3	14	14	14	13	7.14286			1	7.14286
COTS STRESSED WATER >10KDa	<W1	1ug/mL	3	B4	10	10	10	9	10			1	10
COTS STRESSED WATER >10KDa	<W1	1ug/mL	3	B5	10	10	10	9	10			1	10
COTS STRESSED WATER >10KDa	<W0.1	0.1ug/mL	3	C1	20	20	20	19	5	1:100		1	5
COTS STRESSED WATER >10KDa	<W0.1	0.1ug/mL	3	C2	16	16	16	15	6.25			1	6.25
COTS STRESSED WATER >10KDa	<W0.1	0.1ug/mL	3	C3	18	18	18	18	0			0	0
COTS STRESSED WATER >10KDa	<W0.1	0.1ug/mL	3	C4	17	17	17	16	5.88235			1	5.88235
COTS STRESSED WATER >10KDa	<W0.1	0.1ug/mL	3	C5	11	11	11	11	0			0	0
CONTROL SEA WATER	CON	-	3	D1	16	16	16	16	0	original		0	0
CONTROL SEA WATER	CON	-	3	D2	14	14	14	13	7.14286			1	7.14286
CONTROL SEA WATER	CON	-	3	D3	20	20	20	19	5			1	5
CONTROL SEA WATER	CON	-	3	D4	11	11	11	11	0			0	0
CONTROL SEA WATER	CON	-	3	D5	19	19	19	18	5.26316			1	5.26316
					14.0632
					3.63438

## Sheet: Statistical analysis
SPSS Explore													Univariate Analysis of Variance
Case Processing Summary													Between-Subjects Factors
TREATMENT		Cases													N
		Valid		Missing		Total							TREATMENT	<V0.448	5
		N	Percent	N	Percent	N	Percent							<V4.48	5
FP	<V0.448	5	1	0	0	5	1							<V44.8	5
	<V4.48	5	1	0	0	5	1							<W0.1	5
	<V44.8	5	1	0	0	5	1							<W1	5
	<W0.1	5	1	0	0	5	1							<W10	5
	<W1	5	1	0	0	5	1							>V0.933	5
	<W10	5	1	0	0	5	1							>V9.33	5
	>V0.933	5	1	0	0	5	1							>V93.3	5
	>V9.33	5	1	0	0	5	1							>W0.982	5
	>V93.3	5	1	0	0	5	1							>W9.82	5
	>W0.982	5	1	0	0	5	1							>W98.2	5
	>W9.82	5	1	0	0	5	1							CON	5
	>W98.2	5	1	0	0	5	1							V1.1	5
	CON	5	1	0	0	5	1							V11	5
	V1.1	5	1	0	0	5	1							V110	5
	V11	5	1	0	0	5	1							W1.07	5
	V110	5	1	0	0	5	1							W10.7	5
	W1.07	5	1	0	0	5	1							W107	5
	W10.7	5	1	0	0	5	1
	W107	5	1	0	0	5	1						Descriptive Statistics
													Dependent Variable:	FP
Descriptives													TREATMENT	Mean	Std. Deviation	N
TREATMENT				Statistic	Std. Error								<V0.448	2.33333	3.24893	5
FP	<V0.448	Mean		2.33333	1.45297								<V4.48	3.24675	4.49883	5
		95% Confidence Interval for Mean	Lower Bound	-1.70075									<V44.8	3	4.47214	5
			Upper Bound	6.36741									<W0.1	3.42647	3.16074	5
		5% Trimmed Mean		2.22222									<W1	8.58009	1.58272	5
		Median		0									<W10	51.4009	18.0475	5
		Variance		10.5556									>V0.933	3	4.14997	5
		Std. Deviation		3.24893									>V9.33	3.07692	4.21325	5
		Minimum		0									>V93.3	51.3262	13.1313	5
		Maximum		6.66667									>W0.982	2.17111	2.97429	5
		Range		6.66667									>W9.82	14.1515	4.58518	5
		Interquartile Range		5.83333									>W98.2	81.5152	9.81463	5
		Skewness		0.755984	0.912871								CON	3.4812	3.28357	5
		Kurtosis		-2.47922	2								V1.1	3.33333	3.11805	5
	<V4.48	Mean		3.24675	2.01194								V11	4.8914	5.07323	5
		95% Confidence Interval for Mean	Lower Bound	-2.33929									V110	52.9277	14.6315	5
			Upper Bound	8.83279									W1.07	3.81818	5.23813	5
		5% Trimmed Mean		3.10245									W10.7	50.0819	11.4542	5
		Median		0									W107	88.2081	9.64245	5
		Variance		20.2395									Total	22.8405	29.6095	95
		Std. Deviation		4.49883
		Minimum		0									Levene's Test of Equality of Error Variancesa,b
		Maximum		9.09091											Levene Statistic	df1	df2	Sig.
		Range		9.09091									FP	Based on Mean	7.84758	18	76	4.3313e-11
		Interquartile Range		8.11688										Based on Median	2.20445	18	76	0.00917218
		Skewness		0.71417	0.912871									Based on Median and with adjusted df	2.20445	18	33.6938	0.023242
		Kurtosis		-2.72005	2									Based on trimmed mean	7.63008	18	76	8.0118e-11
	<V44.8	Mean		3	2								Tests the null hypothesis that the error variance of the dependent variable is equal across groups.
		95% Confidence Interval for Mean	Lower Bound	-2.55289									a. Dependent variable: FP
			Upper Bound	8.55289									b. Design: Intercept + TREATMENT
		5% Trimmed Mean		2.77778
		Median		0									Tests of Between-Subjects Effects
		Variance		20									Dependent Variable:	FP
		Std. Deviation		4.47214									Source	Type III Sum of Squares	df	Mean Square	F	Sig.
		Minimum		0									Corrected Model	77473.862a	18	4304.1	66.2417	5.69349e-39
		Maximum		10									Intercept	49560.6	1	49560.6	762.755	2.25404e-41
		Range		10									TREATMENT	77473.9	18	4304.1	66.2417	5.69349e-39
		Interquartile Range		7.5									Error	4938.16	76	64.9758
		Skewness		1.25779	0.912871								Total	131973	95
		Kurtosis		0.3125	2								Corrected Total	82412	94
	<W0.1	Mean		3.42647	1.41353								a. R Squared = .940 (Adjusted R Squared = .926)
		95% Confidence Interval for Mean	Lower Bound	-0.498105
			Upper Bound	7.35105									Multiple Comparisons
		5% Trimmed Mean		3.45997									Dependent Variable:	FP
		Median		5									(I) TREATMENT			Mean Difference (I-J)	Std. Error	Sig.	95% Confidence Interval
		Variance		9.99027															Lower Bound	Upper Bound
		Std. Deviation		3.16074									Tukey HSD	<V0.448	<V4.48	-0.91342	5.09807	1	-19.4831	17.6563
		Minimum		0											<V44.8	-0.666667	5.09807	1	-19.2363	17.903
		Maximum		6.25											<W0.1	-1.09314	5.09807	1	-19.6628	17.4765
		Range		6.25											<W1	-6.24675	5.09807	0.999183	-24.8164	12.3229
		Interquartile Range		6.06618											<W10	-49.0675*	5.09807	7.01217e-12	-67.6372	-30.4978
		Skewness		-0.517787	0.912871										>V0.933	-0.666667	5.09807	1	-19.2363	17.903
		Kurtosis		-3.21878	2										>V9.33	-0.74359	5.09807	1	-19.3133	17.8261
	<W1	Mean		8.58009	0.707815										>V93.3	-48.9929*	5.09807	7.10809e-12	-67.5625	-30.4232
		95% Confidence Interval for Mean	Lower Bound	6.61488											>W0.982	0.162222	5.09807	1	-18.4075	18.7319
			Upper Bound	10.5453											>W9.82	-11.8182	5.09807	0.692956	-30.3879	6.75149
		5% Trimmed Mean		8.6075											>W98.2	-79.1818*	5.09807	5.57221e-12	-97.7515	-60.6121
		Median		9.09091											CON	-1.14787	5.09807	1	-19.7175	17.4218
		Variance		2.50501											V1.1	-1	5.09807	1	-19.5697	17.5697
		Std. Deviation		1.58272											V11	-2.55807	5.09807	1	-21.1277	16.0116
		Minimum		6.66667											V110	-50.5944*	5.09807	5.95712e-12	-69.1641	-32.0247
		Maximum		10											W1.07	-1.48485	5.09807	1	-20.0545	17.0848
		Range		3.33333											W10.7	-47.7485*	5.09807	1.00748e-11	-66.3182	-29.1789
		Interquartile Range		3.09524											W107	-85.8748*	5.09807	5.57221e-12	-104.444	-67.3051
		Skewness		-0.432492	0.912871									<V4.48	<V0.448	0.91342	5.09807	1	-17.6563	19.4831
		Kurtosis		-2.84691	2										<V44.8	0.246753	5.09807	1	-18.3229	18.8164
	<W10	Mean		51.4009	8.07108										<W0.1	-0.179717	5.09807	1	-18.7494	18.39
		95% Confidence Interval for Mean	Lower Bound	28.9919											<W1	-5.33333	5.09807	0.999903	-23.903	13.2363
			Upper Bound	73.8098											<W10	-48.1541*	5.09807	8.74323e-12	-66.7238	-29.5844
		5% Trimmed Mean		51.3386											>V0.933	0.246753	5.09807	1	-18.3229	18.8164
		Median		47.3684											>V9.33	0.16983	5.09807	1	-18.3998	18.7395
		Variance		325.712											>V93.3	-48.0794*	5.09807	8.9545e-12	-66.6491	-29.5098
		Std. Deviation		18.0475											>W0.982	1.07564	5.09807	1	-17.494	19.6453
		Minimum		33.3333											>W9.82	-10.9048	5.09807	0.806466	-29.4744	7.66491
		Maximum		70.5882											>W98.2	-78.2684*	5.09807	5.57221e-12	-96.8381	-59.6987
		Range		37.2549											CON	-0.23445	5.09807	1	-18.8041	18.3352
		Interquartile Range		35.7703											V1.1	-0.0865801	5.09807	1	-18.6563	18.4831
		Skewness		0.260457	0.912871										V11	-1.64465	5.09807	1	-20.2143	16.925
		Kurtosis		-3.02091	2										V110	-49.6810*	5.09807	6.41964e-12	-68.2507	-31.1113
	>V0.933	Mean		3	1.85592										W1.07	-0.571429	5.09807	1	-19.1411	17.9982
		95% Confidence Interval for Mean	Lower Bound	-2.15286											W10.7	-46.8351*	5.09807	1.54915e-11	-65.4048	-28.2654
			Upper Bound	8.15286											W107	-84.9614*	5.09807	5.57221e-12	-103.531	-66.3917
		5% Trimmed Mean		2.87037										<V44.8	<V0.448	0.666667	5.09807	1	-17.903	19.2363
		Median		0											<V4.48	-0.246753	5.09807	1	-18.8164	18.3229
		Variance		17.2222											<W0.1	-0.426471	5.09807	1	-18.9961	18.1432
		Std. Deviation		4.14997											<W1	-5.58009	5.09807	0.999818	-24.1498	12.9896
		Minimum		0											<W10	-48.4009*	5.09807	8.13427e-12	-66.9705	-29.8312
		Maximum		8.33333											>V0.933	0	5.09807	1	-18.5697	18.5697
		Range		8.33333											>V9.33	-0.0769231	5.09807	1	-18.6466	18.4928
		Interquartile Range		7.5											>V93.3	-48.3262*	5.09807	8.3048e-12	-66.8959	-29.7565
		Skewness		0.699578	0.912871										>W0.982	0.828889	5.09807	1	-17.7408	19.3986
		Kurtosis		-2.80437	2										>W9.82	-11.1515	5.09807	0.777961	-29.7212	7.41816
	>V9.33	Mean		3.07692	1.88422										>W98.2	-78.5152*	5.09807	5.57221e-12	-97.0848	-59.9455
		95% Confidence Interval for Mean	Lower Bound	-2.15452											CON	-0.481203	5.09807	1	-19.0509	18.0885
			Upper Bound	8.30836											V1.1	-0.333333	5.09807	1	-18.903	18.2363
		5% Trimmed Mean		2.99145											V11	-1.8914	5.09807	1	-20.4611	16.6783
		Median		0											V110	-49.9277*	5.09807	6.25688e-12	-68.4974	-31.3581
		Variance		17.7515											W1.07	-0.818182	5.09807	1	-19.3879	17.7515
		Std. Deviation		4.21325											W10.7	-47.0819*	5.09807	1.35854e-11	-65.6515	-28.5122
		Minimum		0											W107	-85.2081*	5.09807	5.57221e-12	-103.778	-66.6385
		Maximum		7.69231										<W0.1	<V0.448	1.09314	5.09807	1	-17.4765	19.6628
		Range		7.69231											<V4.48	0.179717	5.09807	1	-18.39	18.7494
		Interquartile Range		7.69231											<V44.8	0.426471	5.09807	1	-18.1432	18.9961
		Skewness		0.608581	0.912871										<W1	-5.15362	5.09807	0.99994	-23.7233	13.4161
		Kurtosis		-3.33333	2										<W10	-47.9744*	5.09807	9.27591e-12	-66.5441	-29.4047
	>V93.3	Mean		51.3262	5.87249										>V0.933	0.426471	5.09807	1	-18.1432	18.9961
		95% Confidence Interval for Mean	Lower Bound	35.0216											>V9.33	0.349548	5.09807	1	-18.2201	18.9192
			Upper Bound	67.6308											>V93.3	-47.8997*	5.09807	9.52327e-12	-66.4694	-29.3301
		5% Trimmed Mean		50.918											>W0.982	1.25536	5.09807	1	-17.3143	19.825
		Median		45.4545											>W9.82	-10.725	5.09807	0.826024	-29.2947	7.84463
		Variance		172.43											>W98.2	-78.0887*	5.09807	5.57221e-12	-96.6584	-59.519
		Std. Deviation		13.1313											CON	-0.0547324	5.09807	1	-18.6244	18.5149
		Minimum		40											V1.1	0.0931373	5.09807	1	-18.4765	18.6628
		Maximum		70											V11	-1.46493	5.09807	1	-20.0346	17.1047
		Range		30											V110	-49.5013*	5.09807	6.5622e-12	-68.0709	-30.9316
		Interquartile Range		24.4118											W1.07	-0.391711	5.09807	1	-18.9614	18.178
		Skewness		0.821349	0.912871										W10.7	-46.6554*	5.09807	1.71598e-11	-65.2251	-28.0857
		Kurtosis		-1.46177	2										W107	-84.7817*	5.09807	5.57221e-12	-103.351	-66.212
	>W0.982	Mean		2.17111	1.33014									<W1	<V0.448	6.24675	5.09807	0.999183	-12.3229	24.8164
		95% Confidence Interval for Mean	Lower Bound	-1.52196											<V4.48	5.33333	5.09807	0.999903	-13.2363	23.903
			Upper Bound	5.86418											<V44.8	5.58009	5.09807	0.999818	-12.9896	24.1498
		5% Trimmed Mean		2.1037											<W0.1	5.15362	5.09807	0.99994	-13.4161	23.7233
		Median		0											<W10	-42.8208*	5.09807	3.25464e-10	-61.3904	-24.2511
		Variance		8.8464											>V0.933	5.58009	5.09807	0.999818	-12.9896	24.1498
		Std. Deviation		2.97429											>V9.33	5.50316	5.09807	0.999849	-13.0665	24.0728
		Minimum		0											>V93.3	-42.7461*	5.09807	3.46797e-10	-61.3158	-24.1764
		Maximum		5.55556											>W0.982	6.40898	5.09807	0.998869	-12.1607	24.9787
		Range		5.55556											>W9.82	-5.57143	5.09807	0.999822	-24.1411	12.9982
		Interquartile Range		5.42778											>W98.2	-72.9351*	5.09807	5.57221e-12	-91.5047	-54.3654
		Skewness		0.612791	0.912871										CON	5.09888	5.09807	0.999949	-13.4708	23.6686
		Kurtosis		-3.30874	2										V1.1	5.24675	5.09807	0.999923	-13.3229	23.8164
	>W9.82	Mean		14.1515	2.05055										V11	3.68868	5.09807	1	-14.881	22.2584
		95% Confidence Interval for Mean	Lower Bound	8.45826											V110	-44.3477*	5.09807	9.09303e-11	-62.9173	-25.778
			Upper Bound	19.8448											W1.07	4.7619	5.09807	0.999981	-13.8078	23.3316
		5% Trimmed Mean		14.1077											W10.7	-41.5018*	5.09807	1.00587e-09	-60.0715	-22.9321
		Median		15											W107	-79.6281*	5.09807	5.57221e-12	-98.1977	-61.0584
		Variance		21.0239										<W10	<V0.448	49.0675*	5.09807	7.01217e-12	30.4978	67.6372
		Std. Deviation		4.58518											<V4.48	48.1541*	5.09807	8.74323e-12	29.5844	66.7238
		Minimum		9.09091											<V44.8	48.4009*	5.09807	8.13427e-12	29.8312	66.9705
		Maximum		20											<W0.1	47.9744*	5.09807	9.27591e-12	29.4047	66.5441
		Range		10.9091											<W1	42.8208*	5.09807	3.25464e-10	24.2511	61.3904
		Interquartile Range		8.78788											>V0.933	48.4009*	5.09807	8.13427e-12	29.8312	66.9705
		Skewness		0.0666303	0.912871										>V9.33	48.3239*	5.09807	8.31035e-12	29.7543	66.8936
		Kurtosis		-1.88181	2										>V93.3	0.0746519	5.09807	1	-18.495	18.6443
	>W98.2	Mean		81.5152	4.38923										>W0.982	49.2297*	5.09807	6.82376e-12	30.6601	67.7994
		95% Confidence Interval for Mean	Lower Bound	69.3287											>W9.82	37.2493*	5.09807	3.86964e-08	18.6797	55.819
			Upper Bound	93.7016											>W98.2	-30.1143*	5.09807	1.47407e-05	-48.684	-11.5446
		5% Trimmed Mean		81.8182											CON	47.9197*	5.09807	9.45555e-12	29.35	66.4893
		Median		80											V1.1	48.0675*	5.09807	8.98948e-12	29.4978	66.6372
		Variance		96.3269											V11	46.5095*	5.09807	1.8719e-11	27.9398	65.0791
		Std. Deviation		9.81463											V110	-1.52688	5.09807	1	-20.0966	17.0428
		Minimum		66.6667											W1.07	47.5827*	5.09807	1.07691e-11	29.013	66.1523
		Maximum		90.9091											W10.7	1.31898	5.09807	1	-17.2507	19.8887
		Range		24.2424											W107	-36.8073*	5.09807	5.64093e-08	-55.377	-18.2376
		Interquartile Range		17.1212										>V0.933	<V0.448	0.666667	5.09807	1	-17.903	19.2363
		Skewness		-0.811325	0.912871										<V4.48	-0.246753	5.09807	1	-18.8164	18.3229
		Kurtosis		0.297234	2										<V44.8	0	5.09807	1	-18.5697	18.5697
	CON	Mean		3.4812	1.46846										<W0.1	-0.426471	5.09807	1	-18.9961	18.1432
		95% Confidence Interval for Mean	Lower Bound	-0.59589											<W1	-5.58009	5.09807	0.999818	-24.1498	12.9896
			Upper Bound	7.5583											<W10	-48.4009*	5.09807	8.13427e-12	-66.9705	-29.8312
		5% Trimmed Mean		3.47118											>V9.33	-0.0769231	5.09807	1	-18.6466	18.4928
		Median		5											>V93.3	-48.3262*	5.09807	8.3048e-12	-66.8959	-29.7565
		Variance		10.7818											>W0.982	0.828889	5.09807	1	-17.7408	19.3986
		Std. Deviation		3.28357											>W9.82	-11.1515	5.09807	0.777961	-29.7212	7.41816
		Minimum		0											>W98.2	-78.5152*	5.09807	5.57221e-12	-97.0848	-59.9455
		Maximum		7.14286											CON	-0.481203	5.09807	1	-19.0509	18.0885
		Range		7.14286											V1.1	-0.333333	5.09807	1	-18.903	18.2363
		Interquartile Range		6.20301											V11	-1.8914	5.09807	1	-20.4611	16.6783
		Skewness		-0.307408	0.912871										V110	-49.9277*	5.09807	6.25688e-12	-68.4974	-31.3581
		Kurtosis		-2.74292	2										W1.07	-0.818182	5.09807	1	-19.3879	17.7515
	V1.1	Mean		3.33333	1.39443										W10.7	-47.0819*	5.09807	1.35854e-11	-65.6515	-28.5122
		95% Confidence Interval for Mean	Lower Bound	-0.538234											W107	-85.2081*	5.09807	5.57221e-12	-103.778	-66.6385
			Upper Bound	7.2049										>V9.33	<V0.448	0.74359	5.09807	1	-17.8261	19.3133
		5% Trimmed Mean		3.33333											<V4.48	-0.16983	5.09807	1	-18.7395	18.3998
		Median		5											<V44.8	0.0769231	5.09807	1	-18.4928	18.6466
		Variance		9.72222											<W0.1	-0.349548	5.09807	1	-18.9192	18.2201
		Std. Deviation		3.11805											<W1	-5.50316	5.09807	0.999849	-24.0728	13.0665
		Minimum		0											<W10	-48.3239*	5.09807	8.31035e-12	-66.8936	-29.7543
		Maximum		6.66667											>V0.933	0.0769231	5.09807	1	-18.4928	18.6466
		Range		6.66667											>V93.3	-48.2493*	5.09807	8.49265e-12	-66.819	-29.6796
		Interquartile Range		5.83333											>W0.982	0.905812	5.09807	1	-17.6639	19.4755
		Skewness		-0.381802	0.912871										>W9.82	-11.0746	5.09807	0.787043	-29.6443	7.49508
		Kurtosis		-2.89796	2										>W98.2	-78.4382*	5.09807	5.57221e-12	-97.0079	-59.8686
	V11	Mean		4.8914	2.26882										CON	-0.40428	5.09807	1	-18.974	18.1654
		95% Confidence Interval for Mean	Lower Bound	-1.40785											V1.1	-0.25641	5.09807	1	-18.8261	18.3133
			Upper Bound	11.1907											V11	-1.81448	5.09807	1	-20.3842	16.7552
		5% Trimmed Mean		4.7813											V110	-49.8508*	5.09807	6.30374e-12	-68.4205	-31.2811
		Median		5											W1.07	-0.741259	5.09807	1	-19.3109	17.8284
		Variance		25.7377											W10.7	-47.0049*	5.09807	1.41366e-11	-65.5746	-28.4353
		Std. Deviation		5.07323											W107	-85.1312*	5.09807	5.57221e-12	-103.701	-66.5615
		Minimum		0										>V93.3	<V0.448	48.9929*	5.09807	7.10809e-12	30.4232	67.5625
		Maximum		11.7647											<V4.48	48.0794*	5.09807	8.9545e-12	29.5098	66.6491
		Range		11.7647											<V44.8	48.3262*	5.09807	8.3048e-12	29.7565	66.8959
		Interquartile Range		9.72851											<W0.1	47.8997*	5.09807	9.52327e-12	29.3301	66.4694
		Skewness		0.359388	0.912871										<W1	42.7461*	5.09807	3.46797e-10	24.1764	61.3158
		Kurtosis		-1.51201	2										<W10	-0.0746519	5.09807	1	-18.6443	18.495
	V110	Mean		52.9277	6.54341										>V0.933	48.3262*	5.09807	8.3048e-12	29.7565	66.8959
		95% Confidence Interval for Mean	Lower Bound	34.7603											>V9.33	48.2493*	5.09807	8.49265e-12	29.6796	66.819
			Upper Bound	71.0952											>W0.982	49.1551*	5.09807	6.90736e-12	30.5854	67.7248
		5% Trimmed Mean		52.8995											>W9.82	37.1747*	5.09807	4.12416e-08	18.605	55.7444
		Median		46.1538											>W98.2	-30.1889*	5.09807	1.38815e-05	-48.7586	-11.6193
		Variance		214.081											CON	47.8450*	5.09807	9.71434e-12	29.2753	66.4147
		Std. Deviation		14.6315											V1.1	47.9929*	5.09807	9.21718e-12	29.4232	66.5625
		Minimum		36.3636											V11	46.4348*	5.09807	1.95961e-11	27.8651	65.0045
		Maximum		70											V110	-1.60154	5.09807	1	-20.1712	16.9681
		Range		33.6364											W1.07	47.5080*	5.09807	1.11158e-11	28.9383	66.0777
		Interquartile Range		27.4242											W10.7	1.24433	5.09807	1	-17.3253	19.814
		Skewness		0.305467	0.912871										W107	-36.8819*	5.09807	5.29337e-08	-55.4516	-18.3123
		Kurtosis		-2.5156	2									>W0.982	<V0.448	-0.162222	5.09807	1	-18.7319	18.4075
	W1.07	Mean		3.81818	2.34256										<V4.48	-1.07564	5.09807	1	-19.6453	17.494
		95% Confidence Interval for Mean	Lower Bound	-2.68582											<V44.8	-0.828889	5.09807	1	-19.3986	17.7408
			Upper Bound	10.3222											<W0.1	-1.25536	5.09807	1	-19.825	17.3143
		5% Trimmed Mean		3.68687											<W1	-6.40898	5.09807	0.998869	-24.9787	12.1607
		Median		0											<W10	-49.2297*	5.09807	6.82376e-12	-67.7994	-30.6601
		Variance		27.438											>V0.933	-0.828889	5.09807	1	-19.3986	17.7408
		Std. Deviation		5.23813											>V9.33	-0.905812	5.09807	1	-19.4755	17.6639
		Minimum		0											>V93.3	-49.1551*	5.09807	6.90736e-12	-67.7248	-30.5854
		Maximum		10											>W9.82	-11.9804	5.09807	0.670907	-30.5501	6.58927
		Range		10											>W98.2	-79.3440*	5.09807	5.57221e-12	-97.9137	-60.7744
		Interquartile Range		9.54545											CON	-1.31009	5.09807	1	-19.8798	17.2596
		Skewness		0.62573	0.912871										V1.1	-1.16222	5.09807	1	-19.7319	17.4075
		Kurtosis		-3.23323	2										V11	-2.72029	5.09807	1	-21.29	15.8494
	W10.7	Mean		50.0819	5.12246										V110	-50.7566*	5.09807	5.90672e-12	-69.3263	-32.187
		95% Confidence Interval for Mean	Lower Bound	35.8596											W1.07	-1.64707	5.09807	1	-20.2167	16.9226
			Upper Bound	64.3041											W10.7	-47.9108*	5.09807	9.48552e-12	-66.4804	-29.3411
		5% Trimmed Mean		50.307											W107	-86.0370*	5.09807	5.57221e-12	-104.607	-67.4674
		Median		52.6316										>W9.82	<V0.448	11.8182	5.09807	0.692956	-6.75149	30.3879
		Variance		131.198											<V4.48	10.9048	5.09807	0.806466	-7.66491	29.4744
		Std. Deviation		11.4542											<V44.8	11.1515	5.09807	0.777961	-7.41816	29.7212
		Minimum		35											<W0.1	10.725	5.09807	0.826024	-7.84463	29.2947
		Maximum		61.1111											<W1	5.57143	5.09807	0.999822	-12.9982	24.1411
		Range		26.1111											<W10	-37.2493*	5.09807	3.86964e-08	-55.819	-18.6797
		Interquartile Range		22.2222											>V0.933	11.1515	5.09807	0.777961	-7.41816	29.7212
		Skewness		-0.469311	0.912871										>V9.33	11.0746	5.09807	0.787043	-7.49508	29.6443
		Kurtosis		-2.09818	2										>V93.3	-37.1747*	5.09807	4.12416e-08	-55.7444	-18.605
	W107	Mean		88.2081	4.31223										>W0.982	11.9804	5.09807	0.670907	-6.58927	30.5501
		95% Confidence Interval for Mean	Lower Bound	76.2355											>W98.2	-67.3636*	5.09807	5.57221e-12	-85.9333	-48.794
			Upper Bound	100.181											CON	10.6703	5.09807	0.831768	-7.89936	29.24
		5% Trimmed Mean		88.18											V1.1	10.8182	5.09807	0.81602	-7.75149	29.3879
		Median		90											V11	9.26011	5.09807	0.942411	-9.30956	27.8298
		Variance		92.9768											V110	-38.7762*	5.09807	1.04737e-08	-57.3459	-20.2065
		Std. Deviation		9.64245											W1.07	10.3333	5.09807	0.864829	-8.23634	28.903
		Minimum		76.9231											W10.7	-35.9304*	5.09807	1.18853e-07	-54.5	-17.3607
		Maximum		100											W107	-74.0566*	5.09807	5.57221e-12	-92.6263	-55.487
		Range		23.0769										>W98.2	<V0.448	79.1818*	5.09807	5.57221e-12	60.6121	97.7515
		Interquartile Range		18.5973											<V4.48	78.2684*	5.09807	5.57221e-12	59.6987	96.8381
		Skewness		-0.0643406	0.912871										<V44.8	78.5152*	5.09807	5.57221e-12	59.9455	97.0848
		Kurtosis		-2.02493	2										<W0.1	78.0887*	5.09807	5.57221e-12	59.519	96.6584
															<W1	72.9351*	5.09807	5.57221e-12	54.3654	91.5047
Extreme Valuesa															<W10	30.1143*	5.09807	1.47407e-05	11.5446	48.684
TREATMENT				Case Number	Value										>V0.933	78.5152*	5.09807	5.57221e-12	59.9455	97.0848
FP	<V0.448	Highest	1	74	6.66667										>V9.33	78.4382*	5.09807	5.57221e-12	59.8686	97.0079
			2	73	5										>V93.3	30.1889*	5.09807	1.38815e-05	11.6193	48.7586
		Lowest	1	75	0										>W0.982	79.3440*	5.09807	5.57221e-12	60.7744	97.9137
			2	72	.00b										>W9.82	67.3636*	5.09807	5.57221e-12	48.794	85.9333
	<V4.48	Highest	1	68	9.09091										CON	78.0339*	5.09807	5.57221e-12	59.4643	96.6036
			2	69	7.14286										V1.1	78.1818*	5.09807	5.57221e-12	59.6121	96.7515
		Lowest	1	70	0										V11	76.6237*	5.09807	5.57221e-12	58.0541	95.1934
			2	67	.00b										V110	28.5874*	5.09807	4.96503e-05	10.0177	47.1571
	<V44.8	Highest	1	64	10										W1.07	77.6970*	5.09807	5.57221e-12	59.1273	96.2666
			2	65	5										W10.7	31.4333*	5.09807	5.05934e-06	12.8636	50.003
		Lowest	1	63	0										W107	-6.69299	5.09807	0.998063	-25.2627	11.8767
			2	62	.00b									CON	<V0.448	1.14787	5.09807	1	-17.4218	19.7175
	<W0.1	Highest	1	87	6.25										<V4.48	0.23445	5.09807	1	-18.3352	18.8041
			2	89	5.88235										<V44.8	0.481203	5.09807	1	-18.0885	19.0509
		Lowest	1	90	0										<W0.1	0.0547324	5.09807	1	-18.5149	18.6244
			2	88	0										<W1	-5.09888	5.09807	0.999949	-23.6686	13.4708
	<W1	Highest	1	84	10										<W10	-47.9197*	5.09807	9.45555e-12	-66.4893	-29.35
			2	85	10										>V0.933	0.481203	5.09807	1	-18.0885	19.0509
		Lowest	1	82	6.66667										>V9.33	0.40428	5.09807	1	-18.1654	18.974
			2	83	7.14286										>V93.3	-47.8450*	5.09807	9.71434e-12	-66.4147	-29.2753
	<W10	Highest	1	76	70.5882										>W0.982	1.31009	5.09807	1	-17.2596	19.8798
			2	77	70										>W9.82	-10.6703	5.09807	0.831768	-29.24	7.89936
		Lowest	1	78	33.3333										>W98.2	-78.0339*	5.09807	5.57221e-12	-96.6036	-59.4643
			2	79	35.7143										V1.1	0.14787	5.09807	1	-18.4218	18.7175
	>V0.933	Highest	1	60	8.33333										V11	-1.4102	5.09807	1	-19.9799	17.1595
			2	57	6.66667										V110	-49.4465*	5.09807	6.61005e-12	-68.0162	-30.8769
		Lowest	1	59	0										W1.07	-0.336979	5.09807	1	-18.9067	18.2327
			2	58	.00b										W10.7	-46.6007*	5.09807	1.77216e-11	-65.1703	-28.031
	>V9.33	Highest	1	53	7.69231										W107	-84.7269*	5.09807	5.57221e-12	-103.297	-66.1573
			2	55	7.69231									V1.1	<V0.448	1	5.09807	1	-17.5697	19.5697
		Lowest	1	54	0										<V4.48	0.0865801	5.09807	1	-18.4831	18.6563
			2	52	.00b										<V44.8	0.333333	5.09807	1	-18.2363	18.903
	>V93.3	Highest	1	47	70										<W0.1	-0.0931373	5.09807	1	-18.6628	18.4765
			2	49	60										<W1	-5.24675	5.09807	0.999923	-23.8164	13.3229
		Lowest	1	50	40										<W10	-48.0675*	5.09807	8.98948e-12	-66.6372	-29.4978
			2	46	41.1765										>V0.933	0.333333	5.09807	1	-18.2363	18.903
	>W0.982	Highest	1	43	5.55556										>V9.33	0.25641	5.09807	1	-18.3133	18.8261
			2	41	5.3										>V93.3	-47.9929*	5.09807	9.21718e-12	-66.5625	-29.4232
		Lowest	1	45	0										>W0.982	1.16222	5.09807	1	-17.4075	19.7319
			2	44	.00b										>W9.82	-10.8182	5.09807	0.81602	-29.3879	7.75149
	>W9.82	Highest	1	38	20										>W98.2	-78.1818*	5.09807	5.57221e-12	-96.7515	-59.6121
			2	36	16.6667										CON	-0.14787	5.09807	1	-18.7175	18.4218
		Lowest	1	40	9.09091										V11	-1.55807	5.09807	1	-20.1277	17.0116
			2	37	10										V110	-49.5944*	5.09807	6.48559e-12	-68.1641	-31.0247
	>W98.2	Highest	1	33	90.9091										W1.07	-0.484848	5.09807	1	-19.0545	18.0848
			2	35	90										W10.7	-46.7485*	5.09807	1.62629e-11	-65.3182	-28.1789
		Lowest	1	31	66.6667										W107	-84.8748*	5.09807	5.57221e-12	-103.444	-66.3051
			2	34	80.00c									V11	<V0.448	2.55807	5.09807	1	-16.0116	21.1277
	CON	Highest	1	92	7.14286										<V4.48	1.64465	5.09807	1	-16.925	20.2143
			2	95	5.26316										<V44.8	1.8914	5.09807	1	-16.6783	20.4611
		Lowest	1	94	0										<W0.1	1.46493	5.09807	1	-17.1047	20.0346
			2	91	0										<W1	-3.68868	5.09807	1	-22.2584	14.881
	V1.1	Highest	1	12	6.66667										<W10	-46.5095*	5.09807	1.8719e-11	-65.0791	-27.9398
			2	13	5.00d										>V0.933	1.8914	5.09807	1	-16.6783	20.4611
		Lowest	1	14	0										>V9.33	1.81448	5.09807	1	-16.7552	20.3842
			2	11	0										>V93.3	-46.4348*	5.09807	1.95961e-11	-65.0045	-27.8651
	V11	Highest	1	9	11.7647										>W0.982	2.72029	5.09807	1	-15.8494	21.29
			2	6	7.69231										>W9.82	-9.26011	5.09807	0.942411	-27.8298	9.30956
		Lowest	1	8	0										>W98.2	-76.6237*	5.09807	5.57221e-12	-95.1934	-58.0541
			2	7	0										CON	1.4102	5.09807	1	-17.1595	19.9799
	V110	Highest	1	2	70										V1.1	1.55807	5.09807	1	-17.0116	20.1277
			2	3	66.6667										V110	-48.0363*	5.09807	9.08307e-12	-66.606	-29.4667
		Lowest	1	4	36.3636										W1.07	1.07322	5.09807	1	-17.4965	19.6429
			2	5	45.4545										W10.7	-45.1905*	5.09807	4.67387e-11	-63.7601	-26.6208
	W1.07	Highest	1	28	10										W107	-83.3167*	5.09807	5.57221e-12	-101.886	-64.7471
			2	30	9.09091									V110	<V0.448	50.5944*	5.09807	5.95712e-12	32.0247	69.1641
		Lowest	1	29	0										<V4.48	49.6810*	5.09807	6.41964e-12	31.1113	68.2507
			2	27	.00b										<V44.8	49.9277*	5.09807	6.25688e-12	31.3581	68.4974
	W10.7	Highest	1	22	61.1111										<W0.1	49.5013*	5.09807	6.5622e-12	30.9316	68.0709
			2	21	60										<W1	44.3477*	5.09807	9.09303e-11	25.778	62.9173
		Lowest	1	24	35										<W10	1.52688	5.09807	1	-17.0428	20.0966
			2	23	41.6667										>V0.933	49.9277*	5.09807	6.25688e-12	31.3581	68.4974
	W107	Highest	1	18	100										>V9.33	49.8508*	5.09807	6.30374e-12	31.2811	68.4205
			2	16	94.1176										>V93.3	1.60154	5.09807	1	-16.9681	20.1712
		Lowest	1	19	76.9231										>W0.982	50.7566*	5.09807	5.90672e-12	32.187	69.3263
			2	20	80										>W9.82	38.7762*	5.09807	1.04737e-08	20.2065	57.3459
a. The requested number of extreme values exceeds the number of data points. A smaller number of extremes is displayed.															>W98.2	-28.5874*	5.09807	4.96503e-05	-47.1571	-10.0177
b. Only a partial list of cases with the value .00 are shown in the table of lower extremes.															CON	49.4465*	5.09807	6.61005e-12	30.8769	68.0162
c. Only a partial list of cases with the value 80.00 are shown in the table of lower extremes.															V1.1	49.5944*	5.09807	6.48559e-12	31.0247	68.1641
d. Only a partial list of cases with the value 5.00 are shown in the table of upper extremes.															V11	48.0363*	5.09807	9.08307e-12	29.4667	66.606
															W1.07	49.1096*	5.09807	6.96099e-12	30.5399	67.6792
Tests of Normality															W10.7	2.84587	5.09807	1	-15.7238	21.4155
TREATMENT		Kolmogorov-Smirnova			Shapiro-Wilk										W107	-35.2804*	5.09807	2.06006e-07	-53.8501	-16.7107
		Statistic	df	Sig.	Statistic	df	Sig.							W1.07	<V0.448	1.48485	5.09807	1	-17.0848	20.0545
FP	<V0.448	0.363678	5	0.0293835	0.752779	5	0.0315732								<V4.48	0.571429	5.09807	1	-17.9982	19.1411
	<V4.48	0.364757	5	0.0284055	0.744997	5	0.0267342								<V44.8	0.818182	5.09807	1	-17.7515	19.3879
	<V44.8	0.348833	5	0.0462236	0.770908	5	0.0459543								<W0.1	0.391711	5.09807	1	-18.178	18.9614
	<W0.1	0.2907	5	0.193928	0.777427	5	0.0523772								<W1	-4.7619	5.09807	0.999981	-23.3316	13.8078
	<W1	0.226557	5	.200*	0.842251	5	0.171241								<W10	-47.5827*	5.09807	1.07691e-11	-66.1523	-29.013
	<W10	0.248628	5	.200*	0.8377	5	0.158663								>V0.933	0.818182	5.09807	1	-17.7515	19.3879
	>V0.933	0.365129	5	0.0280752	0.741629	5	0.024852								>V9.33	0.741259	5.09807	1	-17.8284	19.3109
	>V9.33	0.367396	5	0.0261337	0.684029	5	0.00647								>V93.3	-47.5080*	5.09807	1.11158e-11	-66.0777	-28.9383
	>V93.3	0.272617	5	.200*	0.86903	5	0.26252								>W0.982	1.64707	5.09807	1	-16.9226	20.2167
	>W0.982	0.367293	5	0.0262192	0.698513	5	0.00923913								>W9.82	-10.3333	5.09807	0.864829	-28.903	8.23634
	>W9.82	0.217379	5	.200*	0.93339	5	0.619661								>W98.2	-77.6970*	5.09807	5.57221e-12	-96.2666	-59.1273
	>W98.2	0.238656	5	.200*	0.890756	5	0.36092								CON	0.336979	5.09807	1	-18.2327	18.9067
	CON	0.278154	5	.200*	0.83968	5	0.164039								V1.1	0.484848	5.09807	1	-18.0848	19.0545
	V1.1	0.30351	5	0.14862	0.817302	5	0.111283								V11	-1.07322	5.09807	1	-19.6429	17.4965
	V11	0.232517	5	.200*	0.909396	5	0.46397								V110	-49.1096*	5.09807	6.96099e-12	-67.6792	-30.5399
	V110	0.278306	5	.200*	0.881582	5	0.316542								W10.7	-46.2637*	5.09807	2.18335e-11	-64.8334	-27.694
	W1.07	0.366975	5	0.0264847	0.712112	5	0.012766								W107	-84.3900*	5.09807	5.57221e-12	-102.96	-65.8203
	W10.7	0.206726	5	.200*	0.903866	5	0.43162							W10.7	<V0.448	47.7485*	5.09807	1.00748e-11	29.1789	66.3182
	W107	0.202685	5	.200*	0.944819	5	0.700176								<V4.48	46.8351*	5.09807	1.54915e-11	28.2654	65.4048
*. This is a lower bound of the true significance.															<V44.8	47.0819*	5.09807	1.35854e-11	28.5122	65.6515
a. Lilliefors Significance Correction															<W0.1	46.6554*	5.09807	1.71598e-11	28.0857	65.2251
															<W1	41.5018*	5.09807	1.00587e-09	22.9321	60.0715
															<W10	-1.31898	5.09807	1	-19.8887	17.2507
															>V0.933	47.0819*	5.09807	1.35854e-11	28.5122	65.6515
															>V9.33	47.0049*	5.09807	1.41366e-11	28.4353	65.5746
															>V93.3	-1.24433	5.09807	1	-19.814	17.3253
															>W0.982	47.9108*	5.09807	9.48552e-12	29.3411	66.4804
															>W9.82	35.9304*	5.09807	1.18853e-07	17.3607	54.5
															>W98.2	-31.4333*	5.09807	5.05934e-06	-50.003	-12.8636
															CON	46.6007*	5.09807	1.77216e-11	28.031	65.1703
															V1.1	46.7485*	5.09807	1.62629e-11	28.1789	65.3182
															V11	45.1905*	5.09807	4.67387e-11	26.6208	63.7601
															V110	-2.84587	5.09807	1	-21.4155	15.7238
															W1.07	46.2637*	5.09807	2.18335e-11	27.694	64.8334
															W107	-38.1263*	5.09807	1.8284e-08	-56.6959	-19.5566
														W107	<V0.448	85.8748*	5.09807	5.57221e-12	67.3051	104.444
															<V4.48	84.9614*	5.09807	5.57221e-12	66.3917	103.531
															<V44.8	85.2081*	5.09807	5.57221e-12	66.6385	103.778
															<W0.1	84.7817*	5.09807	5.57221e-12	66.212	103.351
															<W1	79.6281*	5.09807	5.57221e-12	61.0584	98.1977
															<W10	36.8073*	5.09807	5.64093e-08	18.2376	55.377
															>V0.933	85.2081*	5.09807	5.57221e-12	66.6385	103.778
															>V9.33	85.1312*	5.09807	5.57221e-12	66.5615	103.701
															>V93.3	36.8819*	5.09807	5.29337e-08	18.3123	55.4516
															>W0.982	86.0370*	5.09807	5.57221e-12	67.4674	104.607
															>W9.82	74.0566*	5.09807	5.57221e-12	55.487	92.6263
															>W98.2	6.69299	5.09807	0.998063	-11.8767	25.2627
															CON	84.7269*	5.09807	5.57221e-12	66.1573	103.297
															V1.1	84.8748*	5.09807	5.57221e-12	66.3051	103.444
															V11	83.3167*	5.09807	5.57221e-12	64.7471	101.886
															V110	35.2804*	5.09807	2.06006e-07	16.7107	53.8501
															W1.07	84.3900*	5.09807	5.57221e-12	65.8203	102.96
															W10.7	38.1263*	5.09807	1.8284e-08	19.5566	56.6959
													Games-Howell	<V0.448	<V4.48	-0.91342	2.48174	1	-13.2057	11.3789
															<V44.8	-0.666667	2.47207	1	-12.8989	11.5655
															<W0.1	-1.09314	2.02711	1	-10.8442	8.65797
															<W1	-6.24675	1.6162	0.188114	-14.9463	2.45282
															<W10	-49.0675	8.20082	0.0578451	-100.173	2.03838
															>V0.933	-0.666667	2.35702	1	-12.1986	10.8653
															>V9.33	-0.74359	2.37937	1	-12.4093	10.9221
															>V93.3	-48.9929*	6.04956	0.0160796	-85.6473	-12.3384
															>W0.982	0.162222	1.96987	1	-9.33339	9.65783
															>W9.82	-11.8182	2.51314	0.0657926	-24.3068	0.670426
															>W98.2	-79.1818*	4.62347	0.000398466	-106.079	-52.285
															CON	-1.14787	2.06579	1	-11.0831	8.78739
															V1.1	-1	2.01384	1	-10.69	8.68998
															V11	-2.55807	2.69419	0.999501	-16.2076	11.0915
															V110	-50.5944*	6.70278	0.0226088	-91.6659	-9.52295
															W1.07	-1.48485	2.75658	1	-15.5437	12.574
															W10.7	-47.7485*	5.32454	0.00945292	-79.4633	-16.0338
															W107	-85.8748*	4.55044	0.000240324	-112.267	-59.4821
														<V4.48	<V0.448	0.91342	2.48174	1	-11.3789	13.2057
															<V44.8	0.246753	2.83688	1	-13.3967	13.8902
															<W0.1	-0.179717	2.45885	1	-12.4169	12.0575
															<W1	-5.33333	2.13282	0.606389	-17.6104	6.9437
															<W10	-48.1541	8.31807	0.0590408	-98.5107	2.20255
															>V0.933	0.246753	2.73721	1	-12.9428	13.4363
															>V9.33	0.16983	2.75648	1	-13.1038	13.4435
															>V93.3	-48.0794*	6.20758	0.0146569	-83.98	-12.1789
															>W0.982	1.07564	2.41188	1	-11.0658	13.2171
															>W9.82	-10.9048	2.87275	0.157688	-24.7221	2.91254
															>W98.2	-78.2684*	4.82838	0.000201595	-104.614	-51.923
															CON	-0.23445	2.49084	1	-12.55	12.0811
															V1.1	-0.0865801	2.44793	1	-12.2994	12.1262
															V11	-1.64465	3.0324	1	-16.2907	13.0014
															V110	-49.6810*	6.84574	0.021479	-89.9806	-9.38135
															W1.07	-0.571429	3.08796	1	-15.5237	14.3808
															W10.7	-46.8351*	5.50341	0.00797837	-77.8589	-15.8114
															W107	-84.9614*	4.75849	0.000110781	-110.824	-59.0989
														<V44.8	<V0.448	0.666667	2.47207	1	-11.5655	12.8989
															<V4.48	-0.246753	2.83688	1	-13.8902	13.3967
															<W0.1	-0.426471	2.44909	1	-12.6023	11.7493
															<W1	-5.58009	2.12156	0.55435	-17.7792	6.61905
															<W10	-48.4009	8.31519	0.0580012	-98.7741	1.97243
															>V0.933	0	2.72845	1	-13.1437	13.1437
															>V9.33	-0.0769231	2.74778	1	-13.3057	13.1519
															>V93.3	-48.3262*	6.20372	0.0143873	-84.2415	-12.4109
															>W0.982	0.828889	2.40193	1	-11.2483	12.9061
															>W9.82	-11.1515	2.8644	0.141283	-24.9297	2.6267
															>W98.2	-78.5152*	4.82342	0.000201425	-104.868	-52.1622
															CON	-0.481203	2.4812	1	-12.7372	11.7748
															V1.1	-0.333333	2.43812	1	-12.4841	11.8174
															V11	-1.8914	3.02449	0.999998	-16.5055	12.7227
															V110	-49.9277*	6.84224	0.0211	-90.2434	-9.61206
															W1.07	-0.818182	3.0802	1	-15.7408	14.1044
															W10.7	-47.0819*	5.49906	0.00782719	-78.1178	-16.0459
															W107	-85.2081*	4.75346	0.000111027	-111.077	-59.3388
														<W0.1	<V0.448	1.09314	2.02711	1	-8.65797	10.8442
															<V4.48	0.179717	2.45885	1	-12.0575	12.4169
															<V44.8	0.426471	2.44909	1	-11.7493	12.6023
															<W1	-5.15362	1.58084	0.321769	-13.6101	3.30284
															<W10	-47.9744	8.19393	0.0628277	-99.1292	3.1804
															>V0.933	0.426471	2.33292	1	-11.0319	11.8849
															>V9.33	0.349548	2.35549	1	-11.2461	11.9452
															>V93.3	-47.8997*	6.04021	0.0178043	-84.6091	-11.1904
															>W0.982	1.25536	1.94096	0.999998	-8.08953	10.6002
															>W9.82	-10.725	2.49055	0.101287	-23.1629	1.71277
															>W98.2	-78.0887*	4.61123	0.000446435	-105.037	-51.1409
															CON	-0.0547324	2.03824	1	-9.86142	9.75196
															V1.1	0.0931373	1.98557	1	-9.45654	9.64281
															V11	-1.46493	2.67312	1	-15.0854	12.1555
															V110	-49.5013*	6.69434	0.024809	-90.6263	-8.37622
															W1.07	-0.391711	2.73599	1	-14.4279	13.6445
															W10.7	-46.6554*	5.31392	0.0106026	-78.4248	-14.886
															W107	-84.7817*	4.538	0.000269607	-111.225	-58.3388
														<W1	<V0.448	6.24675	1.6162	0.188114	-2.45282	14.9463
															<V4.48	5.33333	2.13282	0.606389	-6.9437	17.6104
															<V44.8	5.58009	2.12156	0.55435	-6.61905	17.7792
															<W0.1	5.15362	1.58084	0.321769	-3.30284	13.6101
															<W10	-42.8208	8.10206	0.0953528	-94.6826	9.0411
															>V0.933	5.58009	1.98631	0.484161	-5.68223	16.8424
															>V9.33	5.50316	2.01278	0.512715	-5.94264	16.949
															>V93.3	-42.7461*	5.91499	0.0314933	-80.3188	-5.17346
															>W0.982	6.40898	1.50675	0.125888	-1.54062	14.3586
															>W9.82	-5.57143	2.16928	0.579318	-18.1006	6.95778
															>W98.2	-72.9351*	4.44594	0.00115999	-100.827	-45.0428
															CON	5.09888	1.63014	0.363944	-3.69669	13.8945
															V1.1	5.24675	1.56379	0.294568	-3.09275	13.5863
															V11	3.68868	2.37667	0.945605	-10.2709	17.6483
															V110	-44.3477*	6.58158	0.0410477	-86.2864	-2.40888
															W1.07	4.7619	2.44716	0.829488	-9.6823	19.2061
															W10.7	-41.5018*	5.17114	0.0208706	-74.1852	-8.81839
															W107	-79.6281*	4.36994	0.00074468	-107.016	-52.2398
														<W10	<V0.448	49.0675	8.20082	0.0578451	-2.03838	100.173
															<V4.48	48.1541	8.31807	0.0590408	-2.20255	98.5107
															<V44.8	48.4009	8.31519	0.0580012	-1.97243	98.7741
															<W0.1	47.9744	8.19393	0.0628277	-3.1804	99.1292
															<W1	42.8208	8.10206	0.0953528	-9.0411	94.6826
															>V0.933	48.4009	8.28172	0.0587525	-2.17212	98.9738
															>V9.33	48.3239	8.28811	0.0589477	-2.21002	98.8579
															>V93.3	0.0746519	9.98141	1	-49.3024	49.4517
															>W0.982	49.2297	8.17996	0.0577094	-2.02583	100.485
															>W9.82	37.2493	8.3275	0.143891	-13.0535	87.5521
															>W98.2	-30.1143	9.18737	0.310757	-78.3488	18.1202
															CON	47.9197	8.20358	0.0628306	-3.16684	99.0061
															V1.1	48.0675	8.19066	0.0624857	-3.11066	99.2457
															V11	46.5095	8.38391	0.0656804	-3.48942	96.5083
															V110	-1.52688	10.3903	1	-52.1384	49.0846
															W1.07	47.5827	8.40417	0.0599253	-2.31454	97.4799
															W10.7	1.31898	9.5594	1	-47.2014	49.8394
															W107	-36.8073	9.15083	0.155902	-85.0431	11.4285
														>V0.933	<V0.448	0.666667	2.35702	1	-10.8653	12.1986
															<V4.48	-0.246753	2.73721	1	-13.4363	12.9428
															<V44.8	0	2.72845	1	-13.1437	13.1437
															<W0.1	-0.426471	2.33292	1	-11.8849	11.0319
															<W1	-5.58009	1.98631	0.484161	-16.8424	5.68223
															<W10	-48.4009	8.28172	0.0587525	-98.9738	2.17212
															>V9.33	-0.0769231	2.64476	1	-12.7971	12.6433
															>V93.3	-48.3262*	6.15878	0.0150664	-84.4268	-12.2256
															>W0.982	0.828889	2.28336	1	-10.4954	12.1532
															>W9.82	-11.1515	2.76572	0.121723	-24.4919	2.18888
															>W98.2	-78.5152*	4.76548	0.000245182	-104.975	-52.0553
															CON	-0.481203	2.3666	1	-12.0438	11.0814
															V1.1	-0.333333	2.3214	1	-11.7584	11.0918
															V11	-1.8914	2.93121	0.999997	-16.1546	12.3718
															V110	-49.9277*	6.80152	0.0218254	-90.4401	-9.4154
															W1.07	-0.818182	2.98865	1	-15.4175	13.7812
															W10.7	-47.0819*	5.44831	0.00837436	-78.2759	-15.8878
															W107	-85.2081*	4.69466	0.000138364	-111.177	-59.2393
														>V9.33	<V0.448	0.74359	2.37937	1	-10.9221	12.4093
															<V4.48	-0.16983	2.75648	1	-13.4435	13.1038
															<V44.8	0.0769231	2.74778	1	-13.1519	13.3057
															<W0.1	-0.349548	2.35549	1	-11.9452	11.2461
															<W1	-5.50316	2.01278	0.512715	-16.949	5.94264
															<W10	-48.3239	8.28811	0.0589477	-98.8579	2.21002
															>V0.933	0.0769231	2.64476	1	-12.6433	12.7971
															>V93.3	-48.2493*	6.16736	0.0150343	-84.3127	-12.1859
															>W0.982	0.905812	2.30642	1	-10.563	12.3747
															>W9.82	-11.0746	2.78479	0.12924	-24.4959	2.34673
															>W98.2	-78.4382*	4.77658	0.000237143	-104.875	-52.0018
															CON	-0.40428	2.38886	1	-12.0992	11.2907
															V1.1	-0.25641	2.34409	1	-11.8204	11.3076
															V11	-1.81448	2.94921	0.999999	-16.1415	12.5125
															V110	-49.8508*	6.80929	0.0218204	-90.3241	-9.37749
															W1.07	-0.741259	3.00631	1	-15.399	13.9165
															W10.7	-47.0049*	5.45802	0.00832659	-78.1665	-15.8434
															W107	-85.1312*	4.70592	0.000133164	-111.078	-59.1844
														>V93.3	<V0.448	48.9929*	6.04956	0.0160796	12.3384	85.6473
															<V4.48	48.0794*	6.20758	0.0146569	12.1789	83.98
															<V44.8	48.3262*	6.20372	0.0143873	12.4109	84.2415
															<W0.1	47.8997*	6.04021	0.0178043	11.1904	84.6091
															<W1	42.7461*	5.91499	0.0314933	5.17346	80.3188
															<W10	-0.0746519	9.98141	1	-49.4517	49.3024
															>V0.933	48.3262*	6.15878	0.0150664	12.2256	84.4268
															>V9.33	48.2493*	6.16736	0.0150343	12.1859	84.3127
															>W0.982	49.1551*	6.02124	0.016417	12.3306	85.9795
															>W9.82	37.1747*	6.2202	0.0431946	1.32158	73.0278
															>W98.2	-30.1889	7.33154	0.118274	-66.3013	5.92339
															CON	47.8450*	6.0533	0.0176221	11.2121	84.4779
															V1.1	47.9929*	6.03577	0.0177566	11.2571	84.7287
															V11	46.4348*	6.29552	0.0158048	10.8297	82.0399
															V110	-1.60154	8.79217	1	-44.0323	40.8292
															W1.07	47.5080*	6.32248	0.0139255	11.9779	83.0382
															W10.7	1.24433	7.79267	1	-36.4396	38.9283
															W107	-36.8819*	7.2857	0.0440412	-72.8694	-0.894498
														>W0.982	<V0.448	-0.162222	1.96987	1	-9.65783	9.33339
															<V4.48	-1.07564	2.41188	1	-13.2171	11.0658
															<V44.8	-0.828889	2.40193	1	-12.9061	11.2483
															<W0.1	-1.25536	1.94096	0.999998	-10.6002	8.08953
															<W1	-6.40898	1.50675	0.125888	-14.3586	1.54062
															<W10	-49.2297	8.17996	0.0577094	-100.485	2.02583
															>V0.933	-0.828889	2.28336	1	-12.1532	10.4954
															>V9.33	-0.905812	2.30642	1	-12.3747	10.563
															>V93.3	-49.1551*	6.02124	0.016417	-85.9795	-12.3306
															>W9.82	-11.9804	2.44419	0.0580062	-24.3311	0.370335
															>W98.2	-79.3440*	4.58636	0.000457401	-106.403	-52.2854
															CON	-1.31009	1.98132	0.999997	-10.8665	8.24633
															V1.1	-1.16222	1.9271	0.999999	-10.4363	8.11189
															V11	-2.72029	2.62998	0.998608	-16.2978	10.8572
															V110	-50.7566*	6.67724	0.0228804	-91.9933	-9.51997
															W1.07	-1.64707	2.69386	0.999998	-15.6534	12.3592
															W10.7	-47.9108*	5.29235	0.00981515	-79.7963	-16.0252
															W107	-86.0370*	4.51272	0.000281002	-112.59	-59.4845
														>W9.82	<V0.448	11.8182	2.51314	0.0657926	-0.670426	24.3068
															<V4.48	10.9048	2.87275	0.157688	-2.91254	24.7221
															<V44.8	11.1515	2.8644	0.141283	-2.6267	24.9297
															<W0.1	10.725	2.49055	0.101287	-1.71277	23.1629
															<W1	5.57143	2.16928	0.579318	-6.95778	18.1006
															<W10	-37.2493	8.3275	0.143891	-87.5521	13.0535
															>V0.933	11.1515	2.76572	0.121723	-2.18888	24.4919
															>V9.33	11.0746	2.78479	0.12924	-2.34673	24.4959
															>V93.3	-37.1747*	6.2202	0.0431946	-73.0278	-1.32158
															>W0.982	11.9804	2.44419	0.0580062	-0.370335	24.3311
															>W98.2	-67.3636*	4.8446	0.000434855	-93.6865	-41.0408
															CON	10.6703	2.52213	0.107198	-1.83992	23.1805
															V1.1	10.8182	2.47976	0.096376	-1.59725	23.2336
															V11	9.26011	3.05816	0.364346	-5.49207	24.0123
															V110	-38.7762	6.85718	0.0577778	-79.0243	1.47188
															W1.07	10.3333	3.11326	0.269616	-4.71767	25.3843
															W10.7	-35.9304*	5.51765	0.0264615	-66.9156	-4.94508
															W107	-74.0566*	4.77495	0.00022423	-99.8987	-48.2145
														>W98.2	<V0.448	79.1818*	4.62347	0.000398466	52.285	106.079
															<V4.48	78.2684*	4.82838	0.000201595	51.923	104.614
															<V44.8	78.5152*	4.82342	0.000201425	52.1622	104.868
															<W0.1	78.0887*	4.61123	0.000446435	51.1409	105.037
															<W1	72.9351*	4.44594	0.00115999	45.0428	100.827
															<W10	30.1143	9.18737	0.310757	-18.1202	78.3488
															>V0.933	78.5152*	4.76548	0.000245182	52.0553	104.975
															>V9.33	78.4382*	4.77658	0.000237143	52.0018	104.875
															>V93.3	30.1889	7.33154	0.118274	-5.92339	66.3013
															>W0.982	79.3440*	4.58636	0.000457401	52.2854	106.403
															>W9.82	67.3636*	4.8446	0.000434855	41.0408	93.6865
															CON	78.0339*	4.62836	0.00041907	51.1568	104.911
															V1.1	78.1818*	4.60541	0.000454174	51.209	105.155
															V11	76.6237*	4.94094	0.000161586	50.3828	102.865
															V110	28.5874	7.87919	0.207488	-10.9645	68.1393
															W1.07	77.6970*	4.97524	0.000135616	51.4651	103.929
															W10.7	31.4333	6.74574	0.0611896	-1.23707	64.1036
															W107	-6.69299	6.15311	0.998337	-36.2877	22.9017
														CON	<V0.448	1.14787	2.06579	1	-8.78739	11.0831
															<V4.48	0.23445	2.49084	1	-12.0811	12.55
															<V44.8	0.481203	2.4812	1	-11.7748	12.7372
															<W0.1	0.0547324	2.03824	1	-9.75196	9.86142
															<W1	-5.09888	1.63014	0.363944	-13.8945	3.69669
															<W10	-47.9197	8.20358	0.0628306	-99.0061	3.16684
															>V0.933	0.481203	2.3666	1	-11.0814	12.0438
															>V9.33	0.40428	2.38886	1	-11.2907	12.0992
															>V93.3	-47.8450*	6.0533	0.0176221	-84.4779	-11.2121
															>W0.982	1.31009	1.98132	0.999997	-8.24633	10.8665
															>W9.82	-10.6703	2.52213	0.107198	-23.1805	1.83992
															>W98.2	-78.0339*	4.62836	0.00041907	-104.911	-51.1568
															V1.1	0.14787	2.02505	1	-9.59889	9.89463
															V11	-1.4102	2.70257	1	-15.0727	12.2523
															V110	-49.4465*	6.70616	0.0246519	-90.4968	-8.39624
															W1.07	-0.336979	2.76477	1	-14.4063	13.7323
															W10.7	-46.6007*	5.32879	0.010416	-78.294	-14.9073
															W107	-84.7269*	4.55541	0.000250965	-111.1	-58.3537
														V1.1	<V0.448	1	2.01384	1	-8.68998	10.69
															<V4.48	0.0865801	2.44793	1	-12.1262	12.2994
															<V44.8	0.333333	2.43812	1	-11.8174	12.4841
															<W0.1	-0.0931373	1.98557	1	-9.64281	9.45654
															<W1	-5.24675	1.56379	0.294568	-13.5863	3.09275
															<W10	-48.0675	8.19066	0.0624857	-99.2457	3.11066
															>V0.933	0.333333	2.3214	1	-11.0918	11.7584
															>V9.33	0.25641	2.34409	1	-11.3076	11.8204
															>V93.3	-47.9929*	6.03577	0.0177566	-84.7287	-11.2571
															>W0.982	1.16222	1.9271	0.999999	-8.11189	10.4363
															>W9.82	-10.8182	2.47976	0.096376	-23.2336	1.59725
															>W98.2	-78.1818*	4.60541	0.000454174	-105.155	-51.209
															CON	-0.14787	2.02505	1	-9.89463	9.59889
															V11	-1.55807	2.66308	0.999999	-15.1664	12.0503
															V110	-49.5944*	6.69034	0.0247189	-90.7452	-8.44359
															W1.07	-0.484848	2.72618	1	-14.5121	13.5424
															W10.7	-46.7485*	5.30887	0.0105963	-78.5444	-14.9526
															W107	-84.8748*	4.53209	0.000275154	-111.342	-58.4072
														V11	<V0.448	2.55807	2.69419	0.999501	-11.0915	16.2076
															<V4.48	1.64465	3.0324	1	-13.0014	16.2907
															<V44.8	1.8914	3.02449	0.999998	-12.7227	16.5055
															<W0.1	1.46493	2.67312	1	-12.1555	15.0854
															<W1	-3.68868	2.37667	0.945605	-17.6483	10.2709
															<W10	-46.5095	8.38391	0.0656804	-96.5083	3.48942
															>V0.933	1.8914	2.93121	0.999997	-12.3718	16.1546
															>V9.33	1.81448	2.94921	0.999999	-12.5125	16.1415
															>V93.3	-46.4348*	6.29552	0.0158048	-82.0399	-10.8297
															>W0.982	2.72029	2.62998	0.998608	-10.8572	16.2978
															>W9.82	-9.26011	3.05816	0.364346	-24.0123	5.49207
															>W98.2	-76.6237*	4.94094	0.000161586	-102.865	-50.3828
															CON	1.4102	2.70257	1	-12.2523	15.0727
															V1.1	1.55807	2.66308	0.999999	-12.0503	15.1664
															V110	-48.0363*	6.92559	0.023336	-88.0051	-8.06754
															W1.07	1.07322	3.26116	1	-14.6153	16.7618
															W10.7	-45.1905*	5.60243	0.00845697	-75.9899	-14.391
															W107	-83.3167*	4.87267	8.45848e-05	-109.091	-57.5422
														V110	<V0.448	50.5944*	6.70278	0.0226088	9.52295	91.6659
															<V4.48	49.6810*	6.84574	0.021479	9.38135	89.9806
															<V44.8	49.9277*	6.84224	0.0211	9.61206	90.2434
															<W0.1	49.5013*	6.69434	0.024809	8.37622	90.6263
															<W1	44.3477*	6.58158	0.0410477	2.40888	86.2864
															<W10	1.52688	10.3903	1	-49.0846	52.1384
															>V0.933	49.9277*	6.80152	0.0218254	9.4154	90.4401
															>V9.33	49.8508*	6.80929	0.0218204	9.37749	90.3241
															>V93.3	1.60154	8.79217	1	-40.8292	44.0323
															>W0.982	50.7566*	6.67724	0.0228804	9.51997	91.9933
															>W9.82	38.7762	6.85718	0.0577778	-1.47188	79.0243
															>W98.2	-28.5874	7.87919	0.207488	-68.1393	10.9645
															CON	49.4465*	6.70616	0.0246519	8.39624	90.4968
															V1.1	49.5944*	6.69034	0.0247189	8.44359	90.7452
															V11	48.0363*	6.92559	0.023336	8.06754	88.0051
															W1.07	49.1096*	6.95009	0.0208629	9.22945	88.9897
															W10.7	2.84587	8.30998	1	-37.8119	43.5036
															W107	-35.2804	7.83655	0.0853926	-74.7544	4.19362
														W1.07	<V0.448	1.48485	2.75658	1	-12.574	15.5437
															<V4.48	0.571429	3.08796	1	-14.3808	15.5237
															<V44.8	0.818182	3.0802	1	-14.1044	15.7408
															<W0.1	0.391711	2.73599	1	-13.6445	14.4279
															<W1	-4.7619	2.44716	0.829488	-19.2061	9.6823
															<W10	-47.5827	8.40417	0.0599253	-97.4799	2.31454
															>V0.933	0.818182	2.98865	1	-13.7812	15.4175
															>V9.33	0.741259	3.00631	1	-13.9165	15.399
															>V93.3	-47.5080*	6.32248	0.0139255	-83.0382	-11.9779
															>W0.982	1.64707	2.69386	0.999998	-12.3592	15.6534
															>W9.82	-10.3333	3.11326	0.269616	-25.3843	4.71767
															>W98.2	-77.6970*	4.97524	0.000135616	-103.929	-51.4651
															CON	0.336979	2.76477	1	-13.7323	14.4063
															V1.1	0.484848	2.72618	1	-13.5424	14.5121
															V11	-1.07322	3.26116	1	-16.7618	14.6153
															V110	-49.1096*	6.95009	0.0208629	-88.9897	-9.22945
															W10.7	-46.2637*	5.63269	0.00729854	-77.0136	-15.5138
															W107	-84.3900*	4.90744	7.05816e-05	-110.161	-58.6192
														W10.7	<V0.448	47.7485*	5.32454	0.00945292	16.0338	79.4633
															<V4.48	46.8351*	5.50341	0.00797837	15.8114	77.8589
															<V44.8	47.0819*	5.49906	0.00782719	16.0459	78.1178
															<W0.1	46.6554*	5.31392	0.0106026	14.886	78.4248
															<W1	41.5018*	5.17114	0.0208706	8.81839	74.1852
															<W10	-1.31898	9.5594	1	-49.8394	47.2014
															>V0.933	47.0819*	5.44831	0.00837436	15.8878	78.2759
															>V9.33	47.0049*	5.45802	0.00832659	15.8434	78.1665
															>V93.3	-1.24433	7.79267	1	-38.9283	36.4396
															>W0.982	47.9108*	5.29235	0.00981515	16.0252	79.7963
															>W9.82	35.9304*	5.51765	0.0264615	4.94508	66.9156
															>W98.2	-31.4333	6.74574	0.0611896	-64.1036	1.23707
															CON	46.6007*	5.32879	0.010416	14.9073	78.294
															V1.1	46.7485*	5.30887	0.0105963	14.9526	78.5444
															V11	45.1905*	5.60243	0.00845697	14.391	75.9899
															V110	-2.84587	8.30998	1	-43.5036	37.8119
															W1.07	46.2637*	5.63269	0.00729854	15.5138	77.0136
															W107	-38.1263*	6.69589	0.0204327	-70.6092	-5.64331
														W107	<V0.448	85.8748*	4.55044	0.000240324	59.4821	112.267
															<V4.48	84.9614*	4.75849	0.000110781	59.0989	110.824
															<V44.8	85.2081*	4.75346	0.000111027	59.3388	111.077
															<W0.1	84.7817*	4.538	0.000269607	58.3388	111.225
															<W1	79.6281*	4.36994	0.00074468	52.2398	107.016
															<W10	36.8073	9.15083	0.155902	-11.4285	85.0431
															>V0.933	85.2081*	4.69466	0.000138364	59.2393	111.177
															>V9.33	85.1312*	4.70592	0.000133164	59.1844	111.078
															>V93.3	36.8819*	7.2857	0.0440412	0.894498	72.8694
															>W0.982	86.0370*	4.51272	0.000281002	59.4845	112.59
															>W9.82	74.0566*	4.77495	0.00022423	48.2145	99.8987
															>W98.2	6.69299	6.15311	0.998337	-22.9017	36.2877
															CON	84.7269*	4.55541	0.000250965	58.3537	111.1
															V1.1	84.8748*	4.53209	0.000275154	58.4072	111.342
															V11	83.3167*	4.87267	8.45848e-05	57.5422	109.091
															V110	35.2804	7.83655	0.0853926	-4.19362	74.7544
															W1.07	84.3900*	4.90744	7.05816e-05	58.6192	110.161
															W10.7	38.1263*	6.69589	0.0204327	5.64331	70.6092
													Based on observed means. The error term is Mean Square(Error) = 64.976.
													*. The mean difference is significant at the .05 level.
													FP
													TREATMENT		N	Subset
																1	2	3
													Tukey HSDa,b	>W0.982	5	2.17111
														<V0.448	5	2.33333
														<V44.8	5	3
														>V0.933	5	3
														>V9.33	5	3.07692
														<V4.48	5	3.24675
														V1.1	5	3.33333
														<W0.1	5	3.42647
														CON	5	3.4812
														W1.07	5	3.81818
														V11	5	4.8914
														<W1	5	8.58009
														>W9.82	5	14.1515
														W10.7	5		50.0819
														>V93.3	5		51.3262
														<W10	5		51.4009
														V110	5		52.9277
														>W98.2	5			81.5152
														W107	5			88.2081
														Sig.		0.670907	1	0.998063
													Means for groups in homogeneous subsets are displayed. Based on observed means. The error term is Mean Square(Error) = 64.976.
													a. Uses Harmonic Mean Sample Size = 5.000.
													b. Alpha = .05.
