# Supplementary material for: Crown-of-thorns starfish spines secrete defence proteins
Source: PeerJ. 2023 Aug 21;11:e15689. doi: 10.7717/peerj.15689 (PMC10448888; doi:10.7717/peerj.15689)
Supplement: Table S2 — Includes gene IDs, BLAST hit, domain and protein sequence. [file peerj-11-15689-s002.xlsx]

## Sheet: Total spine
Dataset	Relaxed or Stressed	Accession	-10lgP	Coverage (%)	#Peptides	#Unique	PTM	Avg. Mass	Description	BLASTbestHit	SeaurchinBestHit	GO_annotation	Pfam_annotation	Raw_FPKM	Average	Standard_Deviation	01_podia	02_spine	03_testis	04_nerve	05_nerve	06_nerve-m1	07_eg	08_mg	09_oocyte	10_mouth	11_ST	12_Bpodia	Domains	Amin acid sequence
cots2c	R	oki.185.68	253.35	13	24	4	Carbamidomethylation; Acetylation (K)	184077	oki.185.68	vitellogenin [Parvulastra exigua]	gi|780119307|ref|XP_011677674.1|#PREDICTED: uncharacterized protein LOC583660 [Strongylocentrotus purpuratus]	3#GO:0045735#nutrient reservoir activity#molecular_function,GO:0005319#lipid transporter activity#molecular_function,GO:0006869#lipid transport#biological_process,	3#Pfam#PF09172#Domain of unknown function (DUF1943),Pfam#PF00094#von Willebrand factor type D domain,Pfam#PF01347#Lipoprotein amino terminal region,	22.11,34.8,47.76,20.61,181.68,179.02,8.01,4.72,184.52,3834.13,33.51,79.06	385.827	1088.17	-0.334248	-0.322586	-0.310676	-0.335627	-0.187607	-0.190051	-0.347206	-0.350229	-0.184997	3.16891	-0.323772	-0.281912
cots2c	R	oki.185.68	248.71	17	22	2	Carbamidomethylation; Acetylation (K)	133746	gbr.198.25	vitellogenin [Parvulastra exigua]	gi|780119307|ref|XP_011677674.1|#PREDICTED: uncharacterized protein LOC583660 [Strongylocentrotus purpuratus]	3#GO:0045735#nutrient reservoir activity#molecular_function,GO:0005319#lipid transporter activity#molecular_function,GO:0006869#lipid transport#biological_process,	3#Pfam#PF09172#Domain of unknown function (DUF1943),Pfam#PF00094#von Willebrand factor type D domain,Pfam#PF01347#Lipoprotein amino terminal region,	22.11,34.8,47.76,20.61,181.68,179.02,8.01,4.72,184.52,3834.13,33.51,79.06	385.827	1088.17	-0.334248	-0.322586	-0.310676	-0.335627	-0.187607	-0.190051	-0.347206	-0.350229	-0.184997	3.16891	-0.323772	-0.281912
cots2c	R	oki.8.261	16.32	4	1	1		17494	oki.8.261	Phospholipase A2 AP-PLA2-II; [Acanthaster planci]	gi|390366767|ref|XP_782766.2|#PREDICTED: phospholipase A2 AP-PLA2-II [Strongylocentrotus purpuratus]	8#GO:0016042#lipid catabolic process#biological_process,GO:0005576#extracellular region#cellular_component,GO:0006644#phospholipid metabolic process#biological_process,GO:0019835#cytolysis#biological_process,GO:0009395#phospholipid catabolic process#biological_process,GO:0004623#phospholipase A2 activity#molecular_function,GO:0005509#calcium ion binding#molecular_function,GO:0044179#hemolysis in …	1#Pfam#PF00068#Phospholipase A2,	0,1150.05,0,1.33,7.69,2.13,0,0,11.79,0,1.39,1.16	97.9617	331.342	-0.295651	3.17523	-0.295651	-0.291637	-0.272442	-0.289223	-0.295651	-0.295651	-0.260068	-0.295651	-0.291456	-0.29215
cots2c	R	oki.127.36	21.27	1	1	1		275922	oki.127.36	serine/threonine-protein kinase	gi|780074625|ref|XP_011672008.1|#PREDICTED: serine/threonine-protein kinase atr [Strongylocentrotus purpuratus]	10#GO:0018105#peptidyl-serine phosphorylation#biological_process,GO:0005515#protein binding#molecular_function,GO:0004674#protein serine/threonine kinase activity#molecular_function,GO:0005524#ATP binding#molecular_function,GO:0005488#binding#molecular_function,GO:0006281#DNA repair#biological_process,GO:0016773#"phosphotransferase activity, alcohol group as acceptor"#molecular_function,GO:000367…	4#Pfam#PF08064#UME (NUC010) domain,Pfam#PF02259#FAT domain,Pfam#PF02260#FATC domain,Pfam#PF00454#Phosphatidylinositol 3- and 4-kinase,	5.41,5.34,8.75,5.8,4.24,4.45,2.78,5.75,5.97,0,4.95,3.03	4.70583	2.13506	0.329812	0.297026	1.89417	0.512477	-0.218183	-0.119825	-0.902006	0.489058	0.5921	-2.20408	0.114361	-0.784913	UME, PI3Kc, FATC	MASSYGSASGMAGSNQICLKDAEAAFNKLKNAKSTENTQQALKTCRKSICLVVEKYLTDLQKVSAELSKDASGTPAELSRGASGTPLCIVVLNFLHSCMRQFPNIFARTGLTMSGAIDTAVPMRPQLLVPQDPEYYMCRGLNMWLLSCLTRILNDYFCLALHDQITRVTVSLLHAVKYKDPPSFTELLNEFCRLLTDVSAAVSNNFAAGDVEELDPPLEIEHFVVDGDQLNSSEDQEVLAIYNNSRPITLRYHTNCNLLQLALTKILSEVIPDVTLIRSIHQTPGLWDTLVTQFDAGQYEVKQVTLDVITKLLALNGPPTVDILDKLIHLMLFLLTLFLSGDNLESYEDVVGLEQSLASCFSEFFCLEQHNHHQRLPLSVLEVTMETIARYLPIRGLGV…
cots2c	R	oki.8.30	21.11	2	1	1		47196	oki.8.30	carboxypeptidase D-like [Saccoglossus kowalevskii] PREDICTED	gi|780084949|ref|XP_011673298.1|#PREDICTED: carboxypeptidase E isoform X1 [Strongylocentrotus purpuratus]	8#GO:0005737#cytoplasm#cellular_component,GO:0008270#zinc ion binding#molecular_function,GO:0046872#metal ion binding#molecular_function,GO:0005886#plasma membrane#cellular_component,GO:0031225#anchored component of membrane#cellular_component,GO:0004181#metallocarboxypeptidase activity#molecular_function,GO:0005634#nucleus#cellular_component,GO:0006508#proteolysis#biological_process,	2#Pfam#PF00246#Zinc carboxypeptidase,Pfam#PF13620#Carboxypeptidase regulatory-like domain,	0,0.5,0.76,1.02,1.48,2.72,1.82,1.07,0,0,0.00,0.19	0.796667	0.870427	-0.91526	-0.340829	-0.0421249	0.256579	0.785056	2.20964	1.17567	0.314022	-0.91526	-0.91526	-0.91526	-0.696976	Zn_pept	MRKKSRWSSLTPLRINECNSVMTSGRAVHFLLFVISCGVCALPIVKFEYHNHAQLTSVMTSLTNMYPDTSHIYSIGKSVQGRDLWAVAVAGKKPHGRIIGRPEAKYVGNMHGNEAVGREVLLHLIEYLLKEYRGGNPQIRKLMDTTRIHIMPSMNPDGFEVSKQRCRGVDLRANSNGYDLNRNFPDYFEPTVDPIQPETKAVVDWIHGNKFVLSANFHGGALVANYPYDTGQPGTERPMDTAYHQSPDDDVFRFLAKTYSKAHPRMHLVQENICSPNTDTGFVDGITNGADWYSVAGGMQDFNYIFGGCMEITVEMSCCKYPAASELRAYWEENRSPMLEFLKQANRGVKGQVFNTDNRPIEGASVSIVELKSPHPQFTTSLGEYWKILLPGSYTLLVS…
cots2c	R	*No corresponding oki*	16.32	4	1	1		16318	gbr.558.4	Phospholipase A2 AP-PLA2																			Signal, PA2c	MKTFLILTMAVALAIQFGNLVMCLGNIGYTEGLEYDGYGCFCGKGGKGTPVDATDRCCEVHDNCYGQAVEEGKCWSVETYGTTYWYDQSTSGSCSIRCWEEGDYNSLVPRKACKAAICECDRKAAQCFADNRPTFNRKYLNYAKDTC*
cots2s	S	oki.185.68	267.14	41	74	4	Carbamidomethylation; Oxidation (M)	184077	oki.185.68	vitellogenin [Parvulastra exigua]	gi|780119307|ref|XP_011677674.1|#PREDICTED: uncharacterized protein LOC583660 [Strongylocentrotus purpuratus]	3#GO:0045735#nutrient reservoir activity#molecular_function,GO:0005319#lipid transporter activity#molecular_function,GO:0006869#lipid transport#biological_process,	3#Pfam#PF09172#Domain of unknown function (DUF1943),Pfam#PF00094#von Willebrand factor type D domain,Pfam#PF01347#Lipoprotein amino terminal region,	22.11,34.8,47.76,20.61,181.68,179.02,8.01,4.72,184.52,3834.13,33.51,79.06	385.827	1088.17	-0.334248	-0.322586	-0.310676	-0.335627	-0.187607	-0.190051	-0.347206	-0.350229	-0.184997	3.16891	-0.323772	-0.281912	Signal, LPD_N, DUF1943, VWD	MKLLLFLVGIALANAATTIIQNNDLEKSITIHRNAPETYPTEFQLSKTHRFNYTGDIRTSFPQTGNETVGQRLQCIVEIYPLTTTLWNMRLVNPTIYEINGTHDKPQWMVNSTKVTEELRELLQYNVSILINQGKIEAVFVNKSEAEWIVNLKKGIMNMISLTVEKDNVYEVDEEGVSGICKTLYTIKENKNEDLVTIMNITKVRDLTNCSKTAFNKLMTFKAKDCDDCEKSKDSMEALATFKYNITGTKQRYIINSVQSDAHYVFFPMGVKGGSVLVHVNQTLKLINVTSDPYFEKSPTQESRGGLTYLFPEIVKVEEDMLNTVQKVDFMLKKLEKQTNSSLTIDSPSYFLLLVRSLFEANYETLEDIWNLVRHKPEQRKWLIEAIPFVNRPDMTLLI…
cots2s	S	oki.185.68	250.55	42	56	5	Carbamidomethylation; Oxidation (M)	133746	gbr.198.25	vitellogenin [Parvulastra exigua]	gi|780119307|ref|XP_011677674.1|#PREDICTED: uncharacterized protein LOC583660 [Strongylocentrotus purpuratus]	3#GO:0045735#nutrient reservoir activity#molecular_function,GO:0005319#lipid transporter activity#molecular_function,GO:0006869#lipid transport#biological_process,	3#Pfam#PF09172#Domain of unknown function (DUF1943),Pfam#PF00094#von Willebrand factor type D domain,Pfam#PF01347#Lipoprotein amino terminal region,	22.11,34.8,47.76,20.61,181.68,179.02,8.01,4.72,184.52,3834.13,33.51,79.06	385.827	1088.17	-0.334248	-0.322586	-0.310676	-0.335627	-0.187607	-0.190051	-0.347206	-0.350229	-0.184997	3.16891	-0.323772	-0.281912		MSRCAECYDICEHRVLQWHHNTKVNTTYVYNLVRMRHACYRSLGIQINSLKKTAKFVPPALVHSLLHCEKHFDDSTKATPWDPTVYKQMGVNQVTSEVDDNLTLEEAQALVDVTKKTKVREMCLVAMGQVGLPDHIPYIEPILHQTVTNQTQDVRIAACFALRKMKNIPNKVLSLLLPILRNPYEDPELRMIAYLVTTVTNKRPSVFTLIGQELNKEKSKQVRSFIYSHLKTLSESVVPCEKDLAIAARYALVFTKPFNLGPTYSKVRNVGFYDHETKLGAKLKTRTMFSEGELTPSRTNIGLEVEMLGKKTNFLEVEMKTSGMTNLLDKMFGVDGHFYKRKSIFDLLKESNRKRRSVSSNEEELNKINKKLSPYEVTPEDPRFRLYISMVGNRILDMD…
cots2s	S	oki.258.16	184.89	17	26	26	Carbamidomethylation	183645	oki.258.16	Uncharacterised protein	gi|780069107|ref|XP_011671342.1|#PREDICTED: papilin-like [Strongylocentrotus purpuratus]	5#GO:0030414#peptidase inhibitor activity#molecular_function,GO:0005515#protein binding#molecular_function,GO:0005576#extracellular region#cellular_component,GO:0004869#cysteine-type endopeptidase inhibitor activity#molecular_function,GO:0004867#serine-type endopeptidase inhibitor activity#molecular_function,	3#Pfam#PF00014#Kunitz/Bovine pancreatic trypsin inhibitor domain,Pfam#PF05375#Pacifastin inhibitor (LCMII),Pfam#PF00086#Thyroglobulin type-1 repeat,	2.2,7.13,13.82,3.32,31.19,42.9,1.81,1.45,29.03,1178.08,3.83,2.98	109.812	336.71	-0.319597	-0.304956	-0.285087	-0.316271	-0.233499	-0.198722	-0.320755	-0.321825	-0.239914	3.17266	-0.314756	-0.317281	Signal, EGF, VWC_def, TY	MRIFLLLAFVAVVRGASLPWSVVPWEEWDVDLGITGPEVSMPSPSDSPNSIKVCCEGYTGTVEDGCPTPVCDSPCLNGGTCAAPNHCICPKAYTGQTCDTLKREFVWSSWANVNQKPLLDSFQMTLNLYHIRDEVEACKNVVPEDIECRTRENHMDHTQTGQVVTCDRRSGFKCRNDEQPYGEPCLDYEVRILCPVKDQVTKRGFTCIHETLEYNVGEVVKEGDCSACECQSDGRWNCHRDNHFCDRVRTGQCVVGERVFNHGDTTTLDCKMCTCDTTTGWSCVNIDDHTCVAPPEDDYCRIDNHFIFFHGQTAKKDCNTCICKNREWDCTQMICPDKTNKAAYFHKCTNPLTNERHNDGEIIKRDCNVCVCTQGKWDCTRDPCVEGTSLESEYSLANR…
cots2s	S	oki.185.68	165.18	39	20	1	Carbamidomethylation	50603	gbr.198.26	vitellogenin [Parvulastra exigua]	gi|780119307|ref|XP_011677674.1|#PREDICTED: uncharacterized protein LOC583660 [Strongylocentrotus purpuratus]	3#GO:0045735#nutrient reservoir activity#molecular_function,GO:0005319#lipid transporter activity#molecular_function,GO:0006869#lipid transport#biological_process,	3#Pfam#PF09172#Domain of unknown function (DUF1943),Pfam#PF00094#von Willebrand factor type D domain,Pfam#PF01347#Lipoprotein amino terminal region,	22.11,34.8,47.76,20.61,181.68,179.02,8.01,4.72,184.52,3834.13,33.51,79.06	385.827	1088.17	-0.334248	-0.322586	-0.310676	-0.335627	-0.187607	-0.190051	-0.347206	-0.350229	-0.184997	3.16891	-0.323772	-0.281912
cots2s	S	oki.27.35	136.47	10	12	12	Carbamidomethylation; HexNAc2	150661	oki.27.35	Plancitoxin-1 [Acanthaster planci]	gi|780067770|ref|XP_003725560.2|#PREDICTED: plancitoxin-1 isoform X2 [Strongylocentrotus purpuratus]	6#GO:0005576#extracellular region#cellular_component,GO:0000737#"DNA catabolic process, endonucleolytic"#biological_process,GO:0006259#DNA metabolic process#biological_process,GO:0004531#deoxyribonuclease II activity#molecular_function,GO:0090305#nucleic acid phosphodiester bond hydrolysis#biological_process,GO:0006915#apoptotic process#biological_process,	1#Pfam#PF03265#Deoxyribonuclease II,	16.15,48.42,0.62,6.29,7.92,7.69,0.12,0.29,4.54,0,16.66,15.74	10.37	13.5603	0.426244	2.80598	-0.71901	-0.300878	-0.180674	-0.197636	-0.755883	-0.743346	-0.429931	-0.764732	0.463854	0.396009
cots2s	S	oki.8.264	87.93	35	7	6	Carbamidomethylation; Deamidation (NQ); Dehydration	17667	gbr.558.1	Phospholipase A2 AP-PLA2-II; [Acanthaster planci]	gi|780176033|ref|XP_003724325.2|#PREDICTED: phospholipase A2-like [Strongylocentrotus purpuratus]	8#GO:0016042#lipid catabolic process#biological_process,GO:0005576#extracellular region#cellular_component,GO:0006644#phospholipid metabolic process#biological_process,GO:0019835#cytolysis#biological_process,GO:0009395#phospholipid catabolic process#biological_process,GO:0004623#phospholipase A2 activity#molecular_function,GO:0005509#calcium ion binding#molecular_function,GO:0044179#hemolysis in …	1#Pfam#PF00068#Phospholipase A2,	0,2189.5,3.11,1.39,0,4.44,0,0,0,0,3.36,0.00	183.483	631.733	-0.290444	3.17542	-0.285521	-0.288244	-0.290444	-0.283416	-0.290444	-0.290444	-0.290444	-0.290444	-0.285126	-0.290444
cots2s	S	oki.162.19	65.54	7	3	3	Sulfation	46333	gbr.234.15	pancreatic triacylglycerol lipase-like [Apis florea]	gi|390348966|ref|XP_781220.3|#PREDICTED: inactive pancreatic lipase-related protein 1 [Strongylocentrotus purpuratus]	11#GO:0004806#triglyceride lipase activity#molecular_function,GO:0050253#retinyl-palmitate esterase activity#molecular_function,GO:0004620#phospholipase activity#molecular_function,GO:0006629#lipid metabolic process#biological_process,GO:0009395#phospholipid catabolic process#biological_process,GO:0005615#extracellular space#cellular_component,GO:0019376#galactolipid catabolic process#biological_…	1#Pfam#PF00151#Lipase,	0,751.26,0,0,0,0,1.81,0.61,1.1,0,3.40,0.00	63.1817	216.691	-0.291575	3.17539	-0.291575	-0.291575	-0.291575	-0.291575	-0.283222	-0.28876	-0.286499	-0.291575	-0.275884	-0.291575	Signal, POLXc, CHAD, ORANGE, DM6, DTW, LRRNT, PTN, WSC, ZnF_C3H1, ZnF_NFX	MSGLHCHLITASLVISLMCIMEVCTEVCFKDSSGAVNSELCFSNRLGCWAEDPKLYPRKPSEQDNHFFLYTRNNADSVELKWDDASSLGAFDAQRRTVVVAHGFRSSPDRKGFKGIREAVLREAVSPMCGVPHSPLSSRLSQHLETGPKPVAQCRMVRRAVPCSSSRPNPPRLAPSVWCNQKANQSHCLQLYPDGAVEAPSLSDVNVIMVDWRKAAAGLLKYPQCRVNSRLVGRQLGILLKLLHDHRNLDYAHVHIVGHSLGAHLSGLAGKYLGGQVGRITGLDPAKPDFKDYTHIPDCILDKTDAQFVDIIHSDRGHSVYGLQTAIGHQDFYPNYHKFNQIGCNYFNTLTGCAHTRAVDFFIASVEHLRDPSTECDYSTKPCDGSNCPSSGCPKMGIE…
cots2s	S	oki.162.19	65.54	7	3	3	Sulfation	46407	oki.162.19	pancreatic triacylglycerol lipase-like [Apis florea]	gi|390348966|ref|XP_781220.3|#PREDICTED: inactive pancreatic lipase-related protein 1 [Strongylocentrotus purpuratus]	11#GO:0004806#triglyceride lipase activity#molecular_function,GO:0050253#retinyl-palmitate esterase activity#molecular_function,GO:0004620#phospholipase activity#molecular_function,GO:0006629#lipid metabolic process#biological_process,GO:0009395#phospholipid catabolic process#biological_process,GO:0005615#extracellular space#cellular_component,GO:0019376#galactolipid catabolic process#biological_…	1#Pfam#PF00151#Lipase,	0,751.26,0,0,0,0,1.81,0.61,1.1,0,3.40,0.00	63.1817	216.691	-0.291575	3.17539	-0.291575	-0.291575	-0.291575	-0.291575	-0.283222	-0.28876	-0.286499	-0.291575	-0.275884	-0.291575	Signal, POLXc, CHAD, ORANGE, DM6, DTW, GDNF, LRRNT, PTN, WSC, ZnF_C3H1, ZnF_NFX	MSGLHCHLITASLVISLMCIMEVCTEVCFKDSSDAVNSELCFSNRLGCWAEDPKLYPRKPSEQDNHFFLYTRNNADSVELKWDDASSLGAFDAQRRTVVVAHGFRSSPDRKGFKGIREAVLREAVSPMCGVPHSPLCSRLSQHLETGPKPVAQCRMVRRAVPCSSSRPNPPRLAPSVWCNQKANQSHCLQLYPDGAVEAPSLSDVNVIMVDWRKAAAGLLKYPQCRVNSRLVGRQLGILLKLLHDHRNLDYAHVHIVGHSLGAHLSGLAGKYLGGQVGRITGLDPAKPDFKDYTHIPDCILDKTDAQFVDIIHSDRGHSVYGLQTAIGHQDFYPNYHKFNQIGCNYFNTLTGCAHTRAVDFFIASVEHLRDPSTECDYSTKPCDGSNCPSSGCPKMGIE…
cots2s	S	oki.83.49	67.62	0	3	2		541013	gbr.504.1	deleted in malignant brain tumors 1 protein [Gallus gallus]	gi|780114328|ref|XP_011676986.1|#PREDICTED: uncharacterized protein LOC583353 [Strongylocentrotus purpuratus]	25#GO:0043627#response to estrogen#biological_process,GO:0005515#protein binding#molecular_function,GO:0019048#modulation by virus of host morphology or physiology#biological_process,GO:0005576#extracellular region#cellular_component,GO:0030858#positive regulation of epithelial cell differentiation#biological_process,GO:0005578#proteinaceous extracellular matrix#cellular_component,GO:0007155#cell…	3#Pfam#PF00530#Scavenger receptor cysteine-rich domain,Pfam#PF00008#EGF-like domain,Pfam#PF00754#F5/8 type C domain,	0.49,5.81,7.47,2.36,2.72,6.26,1.07,3.03,9.65,10.62,4.20,4.30	4.83167	3.22174	-1.34762	0.303667	0.818917	-0.767185	-0.655444	0.443343	-1.16759	-0.559222	1.49557	1.79665	-0.196064	-0.165025	Signal, FTP, EGF, SR domain	MKILAIFLLISPVVLGGQVLPPELSLIGKTVTQSTILASYAPSAAIDGTISTFSHTVVGDPHPWWQVDLGEDYCVRTITVILRQGCCAIPLDGKTATQSSTHEPFDAGVAIDGNVYTFSHTLADDSHPWWQVDLGDEYCVGKITVVLRHGCCGQGRFTAAVARAGLSTDYAENEPCGSLATRAQSYDGATVEFVCDVPRRARYVSLDIDPSSPDVTKAILQLGEVKVEENIEQGCPSFCPLQILRMSATQSSTYNSDDTYSADKAIDGQIETFAHTDDNTDSHPTWQVDLGREVNVGRITVMLRQGCCDQNRFMAAVARAGLNADYAQNQPCGSMATEEQAATGATIVFVCPVPRRARYVSLDIDPANSEAVIKLLQLAEVIVEEATYSECPTICPIPL…
cots2s	S	oki.23.43	75.53	9	2	2		33187	gbr.370.21	Uncharacterized protein LOC110975837 [Acanthaster planci]	No seaurchin mapping	No GO mapping	No Pfam mapping	1.96,13843.77,6.01,0,1.56,4.31,0.72,0.48,25.38,0,10.17,4.90	1158.27	3994.9	-0.289447	3.17542	-0.288433	-0.289937	-0.289547	-0.288859	-0.289757	-0.289817	-0.283584	-0.289937	-0.287392	-0.288711	SR, IMPDH, CCP, CFEM, Kelch, Mterf	MSLRGYQWEEHLMRLKHGGSDVATSSQLAVSTISRYSTVDVQTFQQDESRVFIGRLCGQSVGDAVNVTVLLNNNPGWEPVKGVVEYFVIDSNYQEGVLCSNKDSNGYATPNCLIESWPNKYDIIIIATAGSVSGIAFTLNAEFYDEGTEAASYVKANLPTRRHAPSNLGASVKELSRKPVILTESVLTFPSVSLGYLEEALISFTWCGNTETHIFAVASTITSVDGESSFAQYMCKTLPCDVGVNNIAHNGDQLPSNTVLTDPMTSKENLYVVVVNWGGPYDEEANKYIGNFFFNADQVRYY*
cots2s	S	oki.23.43	75.53	9	2	2		31564	oki.23.43	Uncharacterized protein LOC110975837 [Acanthaster planci]	No seaurchin mapping	No GO mapping	No Pfam mapping	1.96,13843.77,6.01,0,1.56,4.31,0.72,0.48,25.38,0,10.17,4.90	1158.27	3994.9	-0.289447	3.17542	-0.288433	-0.289937	-0.289547	-0.288859	-0.289757	-0.289817	-0.283584	-0.289937	-0.287392	-0.288711	SR, CCP, FN3, CFEM, Mterf	MRLKHGGSAVATSSQLAVSTISRYSTVDVQTFQQDESRVFIGRLCGQSVGDAVNVTVLLNNNPGWEPVKGVVEYFVIDSNYQEGVLCSNKDSNGYATPNCLIESWPNKYDIIVIATAGSVSGIAFTLNAEFYDEGTEAASYVKANLPTRRHAPSNLGASVKELSRKPVILTESVLTFPSVSLGYLEEALISFTWCGNTETHIFAVASTITSVDGESSFAQYMCKTLPCDVGVNNIAHNGDQLPSNTVLTDPMTSKENLYVVVVNWGGPYDEEANKYIGNFLFNADQVRYY*
cots2s	S	oki.267.11	57.45	3	2	2	Carbamidomethylation	62245	gbr.102.53	sodium-dependent noradrenaline transporter isoform X1 [Orcinus orca] PREDICTED	gi|780135498|ref|XP_011679914.1|#PREDICTED: sodium-dependent noradrenaline transporter-like, partial [Strongylocentrotus purpuratus]	9#GO:0005328#neurotransmitter:sodium symporter activity#molecular_function,GO:0006836#neurotransmitter transport#biological_process,GO:0007268#synaptic transmission#biological_process,GO:0044765#single-organism transport#biological_process,GO:0022891#substrate-specific transmembrane transporter activity#molecular_function,GO:0016021#integral component of membrane#cellular_component,GO:0005887#int…	1#Pfam#PF00209#Sodium:neurotransmitter symporter family,	26.59,89.6,0.33,4.77,5.41,8.84,6.77,2.67,10.62,18.88,6.15,8.10	15.7275	24.3513	0.446075	3.03362	-0.632307	-0.449976	-0.423694	-0.282839	-0.367845	-0.536214	-0.209742	0.129459	-0.393305	-0.313228	PSN, UreE_C, UDG, TLC, Proteasome_A_N	MHLSQGLHDLVGLKWDLVLCLLAVMVVLFFSLWKGVKSSGKVSFPDESIAGHWKWVVNPSEKVVWVTATLPYIVLLVLLIHGCTLPGSGKGILYYLTPDFGRLLEAQVWIDAAVQIFFSTGAGFGVHLAYASYNKFHNNIYKDVLFTSAVNSVTSFFAGFVVFAVLGYMSETTGKDIKDVATEGPGLVFVVYPEAIATMDGSVFWSIIFYLMLITLGLDSSFGGLEAVISGLTDRFPKYFKNHRKLLTLGVVVSVFFCALLNVTYGGIYMFVLQERFAAGASLLFVVMLEAIIISWLYGVDNFIDNIKEMLGFKPGIWWRLCWKIFAPIFLTLVFFVSLALSEPLTYDDYVYPPWGQAFGWLLAISSMIFVPIFAVVNVFKAEGDGFKTKLAFLITPKN…
cots2s	S	oki.267.11	57.45	2	2	2	Carbamidomethylation	95525	oki.267.11	sodium-dependent noradrenaline transporter isoform X1 [Orcinus orca] PREDICTED	gi|780135498|ref|XP_011679914.1|#PREDICTED: sodium-dependent noradrenaline transporter-like, partial [Strongylocentrotus purpuratus]	9#GO:0005328#neurotransmitter:sodium symporter activity#molecular_function,GO:0006836#neurotransmitter transport#biological_process,GO:0007268#synaptic transmission#biological_process,GO:0044765#single-organism transport#biological_process,GO:0022891#substrate-specific transmembrane transporter activity#molecular_function,GO:0016021#integral component of membrane#cellular_component,GO:0005887#int…	1#Pfam#PF00209#Sodium:neurotransmitter symporter family,	26.59,89.6,0.33,4.77,5.41,8.84,6.77,2.67,10.62,18.88,6.15,8.10	15.7275	24.3513	0.446075	3.03362	-0.632307	-0.449976	-0.423694	-0.282839	-0.367845	-0.536214	-0.209742	0.129459	-0.393305	-0.313228	CBD_IV, 7TM_GPCR_Srsx, Brr6_like_C_C, FN1, PSN	MNMSAGKSLKPEGQTLGCSDANSDKDTAPDRLVEPRTGARSGPARHAHSTRRQSAGAPEDDEAGLVNLGADKAANGGHAGSSREPATALNAEHPGSALKAADGASTATMEMKVKASQHDIMLEPDGDELGVIDDGGTGDDRETWGGKIDFLLSVIGFAVDLANVWRFPYLAYRNGGGAFLIPYVIFLIFGGLPMLYMELALGQYFRQGAINVWSICPLSQGLGWAVVLIAWYVAFYYNVIIAWSIYYLFASFTSVLPWSDCSNEWNTQLCFDGSFNESWVRVGDEAFLVNSSTGNSPAKEYYERRVLEMHLSQGLHDLVGLKWDLVLCLLAVMVVLFFSLWKGVKSSGKVSFPDESVAGHWKWVVNPSEKVVWVTATLPYIVLLVLLIHGCTLPGSGKG…
cots2s	S	oki.90.35	69.42	8	2	2		38696	gbr.44.14	Actin, cytoplasmic; Flags: Precursor [Pisaster ochraceus]"	gi|336455060|ref|NP_001032234.2|#actin, cytoskeletal 1B [Strongylocentrotus purpuratus]	3#GO:0005737#cytoplasm#cellular_component,GO:0005856#cytoskeleton#cellular_component,GO:0005524#ATP binding#molecular_function,	1#Pfam#PF00022#Actin,	5568.25,9150.87,176.44,3394.24,3499.75,4296.77,1126.28,1432.08,2800.86,19025.45,7798.79,5854.88	5343.72	5068.39	0.0442997	0.751155	-1.01951	-0.384635	-0.363818	-0.206565	-0.832106	-0.771772	-0.50171	2.69942	0.484388	0.100852	Actin	MVAFMDTILKGVMVGMGQKDSYVGDEAQSKRGILTLKYPIEHGIVTNWDDMEKIWHHTFYNELRVAPEEHPVLLTEAPLNPKANREKMTQIMFETFNTPAMYVAIQAVLSLYASGRTTGIVFDSGDGVSHTVPIYEGYALPHAILRLDLAGRDLTDYLMKILTERGYSFTTTAEREIVRDIKEKLCYVALDFEQEMQTAASSSSLEKSYELPDGQVITIGNERFRDPEALFQPSFLGMETAGIHETTYNSIMKCDVDIRKDLYANTVLSGGSTMFPGIADRMQKEITALAPPTMKIKIIAPPERKYSVWIGGSILASLSTFQQMWISKQEYDESGPSIVHRKCF*
cots2s	S	oki.90.35	69.42	8	2	2		38726	oki.90.35	Actin, cytoplasmic; Flags: Precursor [Pisaster ochraceus]"	gi|336455060|ref|NP_001032234.2|#actin, cytoskeletal 1B [Strongylocentrotus purpuratus]	3#GO:0005737#cytoplasm#cellular_component,GO:0005856#cytoskeleton#cellular_component,GO:0005524#ATP binding#molecular_function,	1#Pfam#PF00022#Actin,	5568.25,9150.87,176.44,3394.24,3499.75,4296.77,1126.28,1432.08,2800.86,19025.45,7798.79,5854.88	5343.72	5068.39	0.0442997	0.751155	-1.01951	-0.384635	-0.363818	-0.206565	-0.832106	-0.771772	-0.50171	2.69942	0.484388	0.100852	Actin	MEAFMDTILKGVMVGMGQKDSYVGDEAQSKRGILTLKYPIEHGIVTNWDDMEKIWHHTFYNELRVAPEEHPVLLTEAPLNPKANREKMTQIMFETFNTPAMYVAIQAVLSLYASGRTTGIVFDSGDGVSHTVPIYEGYALPHAILRLDLAGRDLTDYLMKILTERGYSFTTTAEREIVRDIKEKLCYVALDFEQEMQTAASSSSLEKSYELPDGQVITIGNERFRDPEALFQPSFLGMETAGIHETTYNSIMKCDVDIRKDLYANTVLSGGSTMFPGIADRMQKEITALAPPTMKIKIIAPPERKYSVWIGGSILASLSTFQQMWISKQEYDESGPSIVHRKCF*
cots2s	S	oki.111.24	52.13	8	2	2	Carbamidomethylation	27145	gbr.283.2	Uncharacterised protein							-0.743695	0.522674	0.520617	-0.451039	-0.440512	-0.445068	-0.290706	-0.193735	-0.0254602	-0.447214	0.0522292	-0.954838
cots2s	S	oki.36.13	49.2	1	2	2		214301	gbr.35.36	vitellogenin 2 [Patiriella regularis]	gi|115916235|ref|XP_788611.2|#PREDICTED: uncharacterized protein C1orf228 homolog [Strongylocentrotus purpuratus]	3#GO:0005319#lipid transporter activity#molecular_function,GO:0005488#binding#molecular_function,GO:0006869#lipid transport#biological_process,	3#Pfam#PF09172#Domain of unknown function (DUF1943),Pfam#PF00094#von Willebrand factor type D domain,Pfam#PF01347#Lipoprotein amino terminal region,	265.45,80.08,39.58,138.77,143.81,504.22,7.68,13.04,131.01,1486,253.72,377.08	286.703	406.581	-0.0522734	-0.508198	-0.607809	-0.363848	-0.351451	0.53499	-0.686268	-0.673085	-0.382934	2.94971	-0.0811237	0.222285	Signal, LPD_N, DUF1943, VWD	MRQLLLLLVGVAFVHAAVVPSQERYFAAGREYVYHYEGQVVSGIPGVSKEVAGIKIITDVHIHMMADNKCLLRFEQVQLAKIQTETEDPAKQLTVDKLQRLPQEIETPLLEQLVKPIEFRYLNGKVFHIVISQNEPVWASNIKKGVLELMLVNIQGTDDLNEPETQRTQPSNILHQKKHYRVMERGIAGYCQSVYKVKISDSRPHIINKEVQPQRFVLNITKTRDLLECQQRTQRSKLSLLSSKKCEKCKGWETSPATEPFSEFRKPNEKKEELLKCLSQVRYSISLKDHSKFVIDAVVAEGKHIFQPFGQKGGKAVAFVNQTFVLKSTREIPQDEFIPDVENPKDQAEDLTFVFEAWTEHEHDSEEDRERTEEDGPHMSQIRTKVKTYLQKIQDNIKK…
cots2s	S	oki.36.13	49.2	1	2	2		247100	oki.36.13	vitellogenin 2 [Patiriella regularis]	gi|115916235|ref|XP_788611.2|#PREDICTED: uncharacterized protein C1orf228 homolog [Strongylocentrotus purpuratus]	3#GO:0005319#lipid transporter activity#molecular_function,GO:0005488#binding#molecular_function,GO:0006869#lipid transport#biological_process,	3#Pfam#PF09172#Domain of unknown function (DUF1943),Pfam#PF00094#von Willebrand factor type D domain,Pfam#PF01347#Lipoprotein amino terminal region,	265.45,80.08,39.58,138.77,143.81,504.22,7.68,13.04,131.01,1486,253.72,377.08	286.703	406.581	-0.0522734	-0.508198	-0.607809	-0.363848	-0.351451	0.53499	-0.686268	-0.673085	-0.382934	2.94971	-0.0811237	0.222285	LPD_N, DUF1943, VWD	MAKAQTAISSIMAMLREWDKGSTAVRLKILNDFIQTSQNKTGPELEADFAQAASLFLARLTAWLRLTHKFLAEFLEVGGVLTVLEILGLKQAKEEDKTQALHLLMCIANAGRKYKELICESYGIRAVAECLARSKSEETQECARHMLQTLAQGNPKFEMQVYKGLIALLPSSSPKAQQMAAQTLRIVQKIVRQANPNVVDPLVDLLKSYHLEVQFEAIELIKDLMSYDVQEQLLVSLVAALVPVKDKHMKRPEILDDPNVPELKRPLPVYVQQAAAAKVIGMLVHDMRDIAEKLIQKRCVHNLMVAMGNEDHADSQRQASITLEYLASTFPIVDENIREAMGDVLYQLFMSNPETLYTNMNPVQADVLRSNKVNIPGNAAVVPSQERYFAAGREYVYHY…
cots2s	S	oki.85.28	67.8	16	2	2	Carbamidomethylation	14816	gbr.207.8	Uncharacterised protein							0.479478	-0.745092	1.52692	-0.457895	-0.48409	-0.444061	1.7817	0.879503	0.0513413	-0.447214	1.70879	1.45376
cots2s	S	oki.141.73	31.95	14	1	1		9984	oki.141.73	Ependymin							-0.743695	1.51328	-0.682513	-0.441392	-0.396585	-0.451871	-0.496999	-0.939479	1.56002	-0.447214	-0.740001	0.295003	Signal	MDIKSAVLLLLVGLATSYAQPAEGPCCFPDQFEVGYGSETAVGGRGGTKRLALVGQAAIDVTKNMIGNEFMLFQSDEERPSRQRLVQDYEQV*
cots2s	S	oki.152.23	38.03	7	1	1		14448	gbr.243.14	Histone H2A [Asterias rubens]	gi|390334386|ref|XP_003723914.1|#PREDICTED: late histone H2A.L3-like [Strongylocentrotus purpuratus]	6#GO:0000786#nucleosome#cellular_component,GO:0006974#cellular response to DNA damage stimulus#biological_process,GO:0003677#DNA binding#molecular_function,GO:0006334#nucleosome assembly#biological_process,GO:0046982#protein heterodimerization activity#molecular_function,GO:0005634#nucleus#cellular_component,	1#Pfam#PF00125#Core histone H2A/H2B/H3/H4,	6.55,10.61,12.05,7.17,10.37,2.87,2.44,9.71,2.26,0,0.57,0.00	5.38333	4.53037	0.257521	1.1537	1.47155	0.394376	1.10072	-0.554775	-0.64969	0.955036	-0.689421	-1.18828	-1.06246	-1.18828	H2A	MSGRGKGGKQRAKAKSRSARAGLQFPVGRVHRFLRKGNYAERVGAGAPVYLAAVMEYLAAEILELAGNAARDNKKTRINPRHLQLAIRNDEELNKLLSGVTIAQGGVLPNIQAVLLPKKSAAGKGGKKSSQSLEY*
cots2s	S	oki.152.23	38.03	7	1	1		14448	oki.152.23	Histone H2A [Asterias rubens]	gi|390334386|ref|XP_003723914.1|#PREDICTED: late histone H2A.L3-like [Strongylocentrotus purpuratus]	6#GO:0000786#nucleosome#cellular_component,GO:0006974#cellular response to DNA damage stimulus#biological_process,GO:0003677#DNA binding#molecular_function,GO:0006334#nucleosome assembly#biological_process,GO:0046982#protein heterodimerization activity#molecular_function,GO:0005634#nucleus#cellular_component,	1#Pfam#PF00125#Core histone H2A/H2B/H3/H4,	6.55,10.61,12.05,7.17,10.37,2.87,2.44,9.71,2.26,0,0.57,0.00	5.38333	4.53037	0.257521	1.1537	1.47155	0.394376	1.10072	-0.554775	-0.64969	0.955036	-0.689421	-1.18828	-1.06246	-1.18828	H2A	MSGRGKGGKQRAKAKSRSARAGLQFPVGRVHRFLRKGNYAERVGAGAPVYLAAVMEYLAAEILELAGNAARDNKKTRINPRHLQLAIRNDEELNKLLSGVTIAQGGVLPNIQAVLLPKKSAAGKGGKKSSQSLEY*
cots2s	S	oki.3.224	20.14	1	1	1		41529	oki.3.224	L-threonine 3-dehydrogenase, mitochondrial-like, partial [Saccoglossus kowalevskii]"	gi|390366108|ref|XP_789391.3|#PREDICTED: L-threonine 3-dehydrogenase, mitochondrial [Strongylocentrotus purpuratus]	7#GO:0000166#nucleotide binding#molecular_function,GO:0050662#coenzyme binding#molecular_function,GO:0005739#mitochondrion#cellular_component,GO:0008743#L-threonine 3-dehydrogenase activity#molecular_function,GO:0008152#metabolic process#biological_process,GO:0003824#catalytic activity#molecular_function,GO:0019518#L-threonine catabolic process to glycine#biological_process,	1#Pfam#PF01370#NAD dependent epimerase/dehydratase family,	75.52,84.32,8.75,56.38,61.87,81.53,53.49,75.53,19.3,0,88.08,76.81	56.7983	30.7883	0.608076	0.893899	-1.5606	-0.0135874	0.164727	0.80328	-0.107454	0.608401	-1.21794	-1.8448	1.01602	0.649975	Pfam:Epimerase	MAAMFQWTIRAAFVRLSRRGNKPGLARCLSTTLPAQQDFGSLPSLDNPRVLITGALGQLGQGLAKMLRNKYGRDNVIMTDIIKPPKHILQSGPYYFADVLDFKNVQELIVNERIDWLVHFSALLSAVGEEDVPLAIKVNIQGLHNVMELAKMYQLRIFCPSTIGAFGPESPRNPTPDVTIQRPRTIYGVSKVHAELLGEYYHHRFGVDFRSLRLPGVISGDTTPGGGTTDYAVQIFDEALTSGLFTCYLKPDTMLPMIYIDDCLRAVVEMLEVPEEKLSRRTYNIAAVSFTPQELADEIKKVVPRLDVDYKPDSRQDIADSWPQRFEDSGARTDWGWTHHYDLTALVNVMLAVVGERLGVTTGSEATAKETV*
cots2s	S	oki.11.66	20.14	1	1	1		58421	oki.11.66	Ependymin	gi|115644340|ref|XP_001177745.1|#PREDICTED: development-specific protein LVN1.2 isoform X2 [Strongylocentrotus purpuratus]	3#GO:0007160#cell-matrix adhesion#biological_process,GO:0005576#extracellular region#cellular_component,GO:0005509#calcium ion binding#molecular_function,	1#Pfam#PF00811#Ependymin,	3105.21,1588.05,1.77,701.46,863.67,1093.28,14.1,39.25,54.57,72.16,2160.45,2102.11	983.007	1048.73	2.02359	0.57693	-0.935643	-0.268464	-0.113792	0.105149	-0.923886	-0.899904	-0.885296	-0.868524	1.12273	1.0671	Signal	MYAAVILCILVVAASASPEKFIFGNKLDQPAPEKCCAEPYYTFQADSVFNTLQEGSLLTELIRARGAYDSIDKKFGLKVDLHISNGTVELYQLINDFKEGLGYYIYTEEEETKCVEFPITSGFPYNCIPEGSTYVGSVTIGDRALRAANWYFNDKTDPTKDMHIVFSIKEEECIDLGYLARTFDPETGTEISVDRTGISDYNLGICDPDTYFKPPEECKSAKVKRVNSVPKRIGGLRGPHESKFINLVTIGERALKAGNWYMLYTDDPDQDVYVVYSFKNPEYVDLGYFSRAMDKRYQVPSCGRTRTAAPTTAWASATQKVTTTTSVQDGSLLVEYDNAEGAYDAKFERIAVKLVIDYFNGTEVYLRLIEDYIKGVSYYILEHAGEDICFVGRTEGRFN…
cots2s	S	oki.226.28	20.14	0	1	1		159115	oki.226.28	Disco-interacting protein 2 homolog C-like, partial [Strongylocentrotus purpuratus]	gi|780135862|ref|XP_011679958.1|#PREDICTED: disco-interacting protein 2 homolog C, partial [Strongylocentrotus purpuratus]	4#GO:0008134#transcription factor binding#molecular_function,GO:0008152#metabolic process#biological_process,GO:0005634#nucleus#cellular_component,GO:0003824#catalytic activity#molecular_function,	2#Pfam#PF00501#AMP-binding enzyme,Pfam#PF06464#DMAP1-binding Domain,	40.18,30.41,14.8,33.38,28.84,34.7,23.02,28.75,9,3.59,39.03,28.48	26.1817	11.5498	1.212	0.366097	-0.985446	0.623245	0.230163	0.737533	-0.273743	0.222371	-1.48762	-1.95603	1.11243	0.198994	DMAP_binding	MAEQRLDASKLPVHIREKLSELEQELKEGDITHKGYEKKKHKLIEPFMHQLEVSEQASAAAAAKRSGKSRRYEHHEPENRYRSDVREEAVKVALAKHREREMPLPMPSKRQSFHTSAVPIETPPDSDTDDDSRSSTSSLNRLGDRKSGSRPSSAGSFRLPGMEPGFSELVNRQAANGHLGRGGARRLDVASSMASSPMPVAQPPPDVTTSSGYIAARQLDDDEEEDEHDGASYRALPNSKVSAKIQQLLNTLKRPKRKPLQEFFQEDDDELEVTEMDPNAPKPEGNTITPAIGEQLSIPTGLPRNLESALQRYGTAHQKATVVTSLDANGKVNCTLTYGKLLTRANKLAFYLLHKIGSKGEPQLKPGDRVALVFPNSDPAGFITAMYGCLIAGVVPVAI…
cots2s	S	oki.9.122	20.14	1	1	1		69056	oki.9.122	hypothetical protein X975_16282, partial [Stegodyphus mimosarum]"	No seaurchin mapping	No GO mapping	No Pfam mapping	0.79,1.93,0,0.65,0,1.39,0,0.19,0,0,6.91,8.60	1.705	2.91647	-0.313736	0.0771482	-0.584612	-0.361739	-0.584612	-0.108007	-0.584612	-0.519464	-0.584612	-0.584612	1.78469	2.36416	HLH, DM4, ENTH, LisH, RINGv, Igc1, Telo_bind, Tet_JBP, DUF1719, HormR, GluR_Homer-bdg, GPS, AMPKBI, ZnF_BED, CTD, MAGUK_N_PEST	MEAWNRLLTSARVEPADLFRQILTEVLDDLMDQVSGPSRTEKVKHSLRNISRMYKGGLSRASSQYRPDWSDSANRCAYVFLYLMQHCHLVYSSLQRESNDIIAAWRNMSNMKVCSIGGGPGSDLVGVTTFLREYGIFPPSLECLVLDLYPNWKDTWDTIHQCIPEHFRVKYERCDVVTDVGLASNAHQFIQQADLITLVKFFSAVSAFFRTDQGRSRGNFLRSILREIKPGCLVLYIDNVHDSDTQFEREFASRVGLEKVSQFRGRPTLPFDQYSLTVENYCRVLDFKPMRSCNVIIQLYKKEAVQRFSRLVTPFDYINSGSGRLDNINRPGSLQPRLSFCPSTEGVPMSVPASQFARPALFGWTTRSNQTERKSTPSVNPYDNQQRVPMVVRGTNVLA…
cots2s	S	oki.270.6	38.03	2	1	1		40534	gbr.448.6	Histone H2A.x [Salmo salar]	gi|115698878|ref|XP_001178526.1|#PREDICTED: histone H2A, embryonic [Strongylocentrotus purpuratus]	11#GO:0006310#DNA recombination#biological_process,GO:0046982#protein heterodimerization activity#molecular_function,GO:0006810#transport#biological_process,GO:0007126#meiotic nuclear division#biological_process,GO:0006281#DNA repair#biological_process,GO:0008289#lipid binding#molecular_function,GO:0000786#nucleosome#cellular_component,GO:0003677#DNA binding#molecular_function,GO:0006334#nucleoso…	3#Pfam#PF14651#Lipocalin / cytosolic fatty-acid binding protein family,Pfam#PF00061#Lipocalin / cytosolic fatty-acid binding protein family,Pfam#PF00125#Core histone H2A/H2B/H3/H4,	47,132.75,2.7,94.84,95.96,105.37,442.29,195.73,163.29,93.21,97.68,102.94	131.147	109.616	-0.767651	0.0146269	-1.17179	-0.331218	-0.321	-0.235155	2.83849	0.589179	0.293237	-0.346088	-0.305309	-0.257323	H2A	MSGRGKVNKKSKSTSRSSRAGLQFPVGRVHRFLRKGKYAHRIGSGAAVYMAAILEYLTAEILELAGNAARDNKKSRIIPRHLQLAIRNDEELNKLLCHVTIAQVYIERCLSETIVLDDYSRKGVAMTHFEGTYKLKSSDNFDVFLCALGVNPLLRTVGNYTKPTLVVTVTKDGTHFLFKQSATAFRKYDLEFDLGVNFEHRTVDGRMVKVSTAFSVCKEFVQRKKMAQFNGKYKLDPDNSQNLEEFMKALGVSEEMRKIGSSVVPEVTIETADGKHFKMTTVTTYTTVVVEFNLGEEQEITTADGRKTKNVYTLDGTTLKHVETPADGNGPTATYDRILNAAGDIEMVMTTGSVVAKRLYKKL*
cots2s	S	oki.270.6	38.03	2	1	1		40535	oki.270.6	Histone H2A.x [Salmo salar]	gi|115698878|ref|XP_001178526.1|#PREDICTED: histone H2A, embryonic [Strongylocentrotus purpuratus]	11#GO:0006310#DNA recombination#biological_process,GO:0046982#protein heterodimerization activity#molecular_function,GO:0006810#transport#biological_process,GO:0007126#meiotic nuclear division#biological_process,GO:0006281#DNA repair#biological_process,GO:0008289#lipid binding#molecular_function,GO:0000786#nucleosome#cellular_component,GO:0003677#DNA binding#molecular_function,GO:0006334#nucleoso…	3#Pfam#PF14651#Lipocalin / cytosolic fatty-acid binding protein family,Pfam#PF00061#Lipocalin / cytosolic fatty-acid binding protein family,Pfam#PF00125#Core histone H2A/H2B/H3/H4,	47,132.75,2.7,94.84,95.96,105.37,442.29,195.73,163.29,93.21,97.68,102.94	131.147	109.616	-0.767651	0.0146269	-1.17179	-0.331218	-0.321	-0.235155	2.83849	0.589179	0.293237	-0.346088	-0.305309	-0.257323	H2A	MSGRGKVNKKSKSTSRSSRAGLQFPVGRVHRFLRKGKYAHRIGSGAAVYMAAILEYLTAEILELAGNAARDNKKSRIIPRHLQLAIRNDEELNKLLCHVTIAQVYIERCLSETIVLDDYSRKGVAMTHFEGTYKLKSSDNFDVFLCALGVNPLLRTIGNYTKPTLVVTVTKDGTHFLFKQSATAFRKYDLEFDLGVNFEHRTVDGRMVKVSTAFSVCKEFVQRKKMAQFNGKYKLDPDNSQNLEEFMKALGVSEEMRKIGSSVVPEVTIETADGKHFKMTTVTTYTTVVVEFNLGEEQEITTADGRKTKNVYTLDGTTLKHVETPADGNGPTATYNRTLNAAGDIEMVMTTGSVVAKRLYKKL*
cots2s	S	oki.14.161	20.14	0	1	1		132538	oki.14.161	ATP-dependent RNA helicase DDX20-like [Saccoglossus kowalevskii]	gi|390339493|ref|XP_793570.2|#PREDICTED: uncharacterized protein LOC588813 [Strongylocentrotus purpuratus]	19#GO:0009889#regulation of biosynthetic process#biological_process,GO:0005737#cytoplasm#cellular_component,GO:0044444#cytoplasmic part#cellular_component,GO:0050794#regulation of cellular process#biological_process,GO:0008026#ATP-dependent helicase activity#molecular_function,GO:0006397#mRNA processing#biological_process,GO:0005681#spliceosomal complex#cellular_component,GO:1901362#organic cycli…	2#Pfam#PF00271#Helicase conserved C-terminal domain,Pfam#PF00270#DEAD/DEAH box helicase,	8.34,6.75,5.12,4.42,2.13,10.04,10.93,11.7,12.28,2.2,4.82,7.35	7.17333	3.54164	0.329415	-0.11953	-0.57977	-0.777418	-1.42401	0.809419	1.06071	1.27813	1.44189	-1.40425	-0.664476	0.0498828	DEXDc, HELICc	MIVQAKSGTGKTCVFSVIILESLDLQCAGVQALVLTPTREIATQVQGVIQSIGRAMQGLRCHTFIGGTLFGPDRQKLKKCHIAVGTPGRVKQLIEYDVMRTESIRLLILDEADKLLDDKFQDQINWIYNHLPVNKQMLALSATYPEALAKGLTSYMRDPTFVRLNPRKVALKGIKQFYKVVPSHGLYHKAFEVKVEHLLQLLTRVSFSQCLVFSNLSSRAQNLSDILCDRGWPSTCISGNQDQVQRHSAMSMLKTFKCRVLISTDLTARGIDAENVNLIVNLDVPSDGKTYMHRIGRAGRFGSKGVAVTFASEGNEETLLRNIQKQCHVSLQLLPDPVPSDLVNSISVDRSCIDTEEESTSGFECDSDSQDNPDIDAEIGMEELQCVSGAREASDKVVK…
cots2s	S	oki.23.4	20.14	1	1	1		85054	oki.23.4	Carnitine O-acetyltransferase [Pteropus alecto]	gi|779988918|ref|XP_011666338.1|#PREDICTED: carnitine O-acetyltransferase [Strongylocentrotus purpuratus]	9#GO:0005777#peroxisome#cellular_component,GO:0006810#transport#biological_process,GO:0016746#"transferase activity, transferring acyl groups"#molecular_function,GO:0005739#mitochondrion#cellular_component,GO:0004092#carnitine O-acetyltransferase activity#molecular_function,GO:0005743#mitochondrial inner membrane#cellular_component,GO:0006631#fatty acid metabolic process#biological_process,GO:000…	1#Pfam#PF00755#Choline/Carnitine o-acyltransferase,	45.23,31.73,57.8,19.37,16.57,24.45,15.89,26.35,10.42,81.12,42.81,41.72	34.455	20.459	0.526663	-0.133193	1.14106	-0.737328	-0.874187	-0.489026	-0.907424	-0.396158	-1.17479	2.2809	0.408377	0.3551	Nothing	MLSSVARHIMRQSANIGPMMKAAEKTAVMLGRKQAQPGRMFAHQQSLSRLPVPPLQQTLYKYLLAIKPILSEEDYEATKKIVTEFGKPGGYGESLQMALIERSQKMDNWLSEWWLHKAYLEFRSPVVIHVSPGVVFPRENFRGVDGQLEFSARFIAGVLDFKQLIDSDSLPVDYMGGQPLCMDQYHRILSSCRVPGVKKDSVATFPPYKPDAPRHIIIGHNNHLHRSSVVVKTMRKTMRKTMHMTMHKTMRKTMHKTRHKTRHKTMHKTRHKTMHKTRHKTRHKTRHKTRHKTMHMTMHKTRHKTMHKTMHKTRHMTMHKNRLFSLDVYDSQGKPLPISEIHTKLKEIVAASPFPAVPVNILTSEHRNTWGKIYKKMSKDKVNRASFEEIKRSIFMLSL…
cots2s	S	oki.52.136	20.14	0	1	1		317362	gbr.150.26	dynein heavy chain 6, axonemal-like, partial [Strongylocentrotus purpuratus]	gi|780092343|ref|XP_011674183.1|#PREDICTED: dynein heavy chain 6, axonemal, partial [Strongylocentrotus purpuratus]	10#GO:0005737#cytoplasm#cellular_component,GO:0005874#microtubule#cellular_component,GO:0005524#ATP binding#molecular_function,GO:0001539#cilium or flagellum-dependent cell motility#biological_process,GO:0006200#obsolete ATP catabolic process#biological_process,GO:0005930#axoneme#cellular_component,GO:0016887#ATPase activity#molecular_function,GO:0005858#axonemal dynein complex#cellular_component…	6#Pfam#PF12775#P-loop containing dynein motor region D3,Pfam#PF12774#Hydrolytic ATP binding site of dynein motor region D1,Pfam#PF12780#P-loop containing dynein motor region D4,Pfam#PF12777#Microtubule-binding stalk of dynein motor,Pfam#PF08393#Dynein heavy chain, N-terminal region 2,Pfam#PF12781#ATP-binding dynein motor region D5,	1.84,3.3,17.82,1.16,1.38,1.38,4.41,5.98,2.59,3.15,3.49,1.16	3.97167	4.60294	-0.46311	-0.145921	3.00858	-0.610842	-0.563046	-0.563046	0.095229	0.436315	-0.300171	-0.178509	-0.104643	-0.610842	AAA domian	EALISDYSDSGVSAQQVLNDLSEVERDLQLRRLLWESTEEWSRLVDEWTASQFDKLNVDVVQKNVNRFTQTVYMLEKGLPPNEVLPRLKERVIDFKQGMPIMTALRNPALRPRHWQEIQDLIGRHIVRDKNFTLGKFMDLQLFQYKDKINDISTQASNEATLEIMLNKVIDLWQSTDFRLIPHSNRDFMIIAGADDITQQLEESQVTIATIRGSRFVSPIKALVEEWDRKLNVFSRTLDEWMNCQRNWLYLEQIFLAPDIQRQLPSEAKLFAAVDKSWKDIMRRTEDRPNALRAAVAPGVLEILQTNNSNLEKIHKCLEDYLETKRLVFPRFYFLSNDELLDILAQSKNPDAVQPHLVKCFGNIKSLEIVREPKLPPTVRTMISAEGEIILMPKNVRAR…
cots2s	S	oki.52.136	20.14	0	1	1		453711	oki.52.136	dynein heavy chain 6, axonemal-like, partial [Strongylocentrotus purpuratus]	gi|780092343|ref|XP_011674183.1|#PREDICTED: dynein heavy chain 6, axonemal, partial [Strongylocentrotus purpuratus]	10#GO:0005737#cytoplasm#cellular_component,GO:0005874#microtubule#cellular_component,GO:0005524#ATP binding#molecular_function,GO:0001539#cilium or flagellum-dependent cell motility#biological_process,GO:0006200#obsolete ATP catabolic process#biological_process,GO:0005930#axoneme#cellular_component,GO:0016887#ATPase activity#molecular_function,GO:0005858#axonemal dynein complex#cellular_component…	6#Pfam#PF12775#P-loop containing dynein motor region D3,Pfam#PF12774#Hydrolytic ATP binding site of dynein motor region D1,Pfam#PF12780#P-loop containing dynein motor region D4,Pfam#PF12777#Microtubule-binding stalk of dynein motor,Pfam#PF08393#Dynein heavy chain, N-terminal region 2,Pfam#PF12781#ATP-binding dynein motor region D5,	1.84,3.3,17.82,1.16,1.38,1.38,4.41,5.98,2.59,3.15,3.49,1.16	3.97167	4.60294	-0.46311	-0.145921	3.00858	-0.610842	-0.563046	-0.563046	0.095229	0.436315	-0.300171	-0.178509	-0.104643	-0.610842	AAA domian	MDTPHYSESELTSESGVGRSPEPNVDLGYNDISPQNVSELFVTPNTGSRPAQSAPATLQTTPFDAISAAFLESASPPVHLLPGPDEEPPSRQNGAAKTVTFAGTPQYFQATKAAQRRGLDLKARLYDRPQDAQVYQTIRPAGMQSKKIQNGVIGTSNVPVVPRPPPSRVPAPGGALRTTLFKRDHARIRMKRQGSKSSLLEEETKQQKQDRLGSEPAASRDTEPKSTTGQATPDEIQFLDVHKPTAQHSLTDKHPVATGMSVAPTSPLMQLTKKEFTPDPSVTSDTGDPPSPPSSPSGSRKQDPKLVFMYLKTNKFDDTPPEIDSLTYHLRRMRNAMELVVDLPRHGPTVKEEMIGIEDRLLEPAKHSIEAQLKSKQKHLFGRPEDPGEFVYALPRDRR…
cots2s	S	oki.28.81	20.14	0	1	1		122983	gbr.24.87	Zinc finger protein 227-like [Saccoglossus kowalevskii]	gi|780012559|ref|XP_011663975.1|#PREDICTED: zinc finger and BTB domain-containing protein 17 [Strongylocentrotus purpuratus]	7#GO:0003676#nucleic acid binding#molecular_function,GO:0003677#DNA binding#molecular_function,GO:0008270#zinc ion binding#molecular_function,GO:0005634#nucleus#cellular_component,GO:0046872#metal ion binding#molecular_function,GO:0006351#"transcription, DNA-templated"#biological_process,GO:0006355#"regulation of transcription, DNA-templated"#biological_process,	No Pfam mapping	15.86,22.1,21.27,13.54,16.31,20.4,49.33,31.68,8.1,46.03,23.22,25.83	24.4725	12.4274	-0.693028	-0.190909	-0.257698	-0.879713	-0.656817	-0.327704	2.00022	0.579971	-1.31746	1.73468	-0.100786	0.109235	ZnF_C2H2	MASQDASVTVATKQALQKGHRFGPYKGRLRAADIDDDVPFGAWKIYPKDENDKTYILSSQDPTLPRWLHCIKITKEEAECNITLVQVGFKFYFEMTKDVLEGVEYALRGRRSERPTEDTDEPACQPPPPGKRRGRKPRKEYTPEELQALEERKKKELEERIRRTSTRDRSRRCVECGEKFTSGVLFMRHRGKCGVLKEEDLLTESSDGDENTDDEQEKEPDNEEGKDEENGDSMDVPEEEDGAEGGEGEDEENITQLGEAVDHLIAGMEADEGEDGNPSVLAESGQQDAPVIPNPLLREIGDAPVPLAVTVASPLPVKRPRGRPRKDGRPPIQRKKRGRRKRRKRRRRFDDDDDEDHQPIIKQVKDECLPSQPDPERFPFTCETCQKVFPTKSWFDFHL…
cots2s	S	oki.28.81	20.14	0	1	1		123656	oki.28.81	Zinc finger protein 227-like [Saccoglossus kowalevskii]	gi|780012559|ref|XP_011663975.1|#PREDICTED: zinc finger and BTB domain-containing protein 17 [Strongylocentrotus purpuratus]	7#GO:0003676#nucleic acid binding#molecular_function,GO:0003677#DNA binding#molecular_function,GO:0008270#zinc ion binding#molecular_function,GO:0005634#nucleus#cellular_component,GO:0046872#metal ion binding#molecular_function,GO:0006351#"transcription, DNA-templated"#biological_process,GO:0006355#"regulation of transcription, DNA-templated"#biological_process,	No Pfam mapping	15.86,22.1,21.27,13.54,16.31,20.4,49.33,31.68,8.1,46.03,23.22,25.83	24.4725	12.4274	-0.693028	-0.190909	-0.257698	-0.879713	-0.656817	-0.327704	2.00022	0.579971	-1.31746	1.73468	-0.100786	0.109235	ZnF_C2H2	MASQDASVTVATKQALQKGHRFGPYKGRLRAADIDDDVPFGAWKIYPKDENDKTYILSSQDPTLPRWLHCIKITKEEAECNITLVQVGFKFYFEMTKDVLEGVEYALRGRRSERPTEDTDEPACQPPPPGKRRGRKPRKEYTPEELQALEERKKKELEERIRRTSTRDRSRRCVECGEKFTSGVLFMRHRGKCGVLKEEDLLTESSDGDENTDDEQEKEPDNEEGKDEENGDSMDVPXXXXXXXXXXXXXXXNITQLGEAVDHLIAGMEADEGEDGDPSVLAESGQQDAPVIPNPLLREIGDAPVPLAVTVASPLPVKRPRGRPRKDGRPPIQRKKRGRRKRRKRRRRFDDDDDEDHQPIIKQVKDECLPSQPDPERFPFTCETCQKVFPTKSWFDFHL…
cots2s	S	oki.24.119	20.14	1	1	1		39121	oki.24.119	glycosyltransferase-like protein LARGE1, partial [Strongylocentrotus purpuratus]"	gi|390368395|ref|XP_790103.3|#PREDICTED: glycosyltransferase-like protein LARGE1, partial [Strongylocentrotus purpuratus]	3#GO:0016757#"transferase activity, transferring glycosyl groups"#molecular_function,GO:0016021#integral component of membrane#cellular_component,GO:0000139#Golgi membrane#cellular_component,	No Pfam mapping	10.88,7.87,10.49,6.83,6.19,22.57,6.87,12.26,4.15,0,13.84,14.17	9.67667	5.785	0.208009	-0.312302	0.140594	-0.492077	-0.602708	2.22875	-0.485163	0.446557	-0.955345	-1.67272	0.719678	0.776722	Zn_dep_PLPC, Col_cuticle_N, PEHE	MNVVRVNKKSLGVAVMLFVVAVVIVKYFLRSQDGWSESKEEVLDFKKKETMADKFLEMERENQMLRKQLSISQAQLQQTYETYQNVKVNGSDDTGTSSNQSTSGSPCQNQQPAVPKCEIIHVAVVCAGHNASREVTNLIKSVLFYRKNPLHFHFLVDEVAHIILKTLFQTWDVPGVKVSFYLAEDFKDEEKVLLLSRGSQPGSGQASGSFGPMELTGKLRSRLWKTRAATIIVKYAMPLVRHGLEESTWHSSQRFPSDADKYNLLFDIGQEENFSNSPCMYSLSPQYQSHWAGLPAIDGACPTWCARRGAMTPRHPLIHLALAFNLASPGRRTSFSWSLCPEFCSFR*
cots2s	S	oki.181.26	38.03	7	1	1		13542	gbr.260.13	Histone H2A [Asterias rubens]	gi|780070294|ref|XP_011671468.1|#PREDICTED: late histone H2A.L3 [Strongylocentrotus purpuratus]	5#GO:0000786#nucleosome#cellular_component,GO:0003677#DNA binding#molecular_function,GO:0006334#nucleosome assembly#biological_process,GO:0046982#protein heterodimerization activity#molecular_function,GO:0005634#nucleus#cellular_component,	1#Pfam#PF00125#Core histone H2A/H2B/H3/H4,	0,0,27.65,0,0,0,0,10.22,0,0,0.00,0.00	3.15583	8.25425	-0.382328	-0.382328	2.96746	-0.382328	-0.382328	-0.382328	-0.382328	0.855822	-0.382328	-0.382328	-0.382328	-0.382328	H2A	MSGRGKGGKQRAKAKSRSARAGLQFPVGRVHRFLRKGNYAERVGAGAPVYLAAVMEYLAAEILELAGNAARDNKKTRINPRHLQLAIRNDEELNKLLSGVTIAQGGVLPNIQAVLLPKKTSSKAAK*
cots2s	S	oki.181.26	38.03	7	1	1		13542	oki.181.26	Histone H2A [Asterias rubens]	gi|780070294|ref|XP_011671468.1|#PREDICTED: late histone H2A.L3 [Strongylocentrotus purpuratus]	5#GO:0000786#nucleosome#cellular_component,GO:0003677#DNA binding#molecular_function,GO:0006334#nucleosome assembly#biological_process,GO:0046982#protein heterodimerization activity#molecular_function,GO:0005634#nucleus#cellular_component,	1#Pfam#PF00125#Core histone H2A/H2B/H3/H4,	0,0,27.65,0,0,0,0,10.22,0,0,0.00,0.00	3.15583	8.25425	-0.382328	-0.382328	2.96746	-0.382328	-0.382328	-0.382328	-0.382328	0.855822	-0.382328	-0.382328	-0.382328	-0.382328	H2A	MSGRGKGGKQRAKAKSRSARAGLQFPVGRVHRFLRKGNYAERVGAGAPVYLAAVMEYLAAEILELAGNAARDNKKTRINPRHLQLAIRNDEELNKLLSGVTIAQGGVLPNIQAVLLPKKTSSKAAK*
cots2s	S	oki.40.48	38.03	7	1	1		13526	oki.40.48	Histone H2A [Asterias rubens]	gi|780070294|ref|XP_011671468.1|#PREDICTED: late histone H2A.L3 [Strongylocentrotus purpuratus]	5#GO:0000786#nucleosome#cellular_component,GO:0003677#DNA binding#molecular_function,GO:0006334#nucleosome assembly#biological_process,GO:0046982#protein heterodimerization activity#molecular_function,GO:0005634#nucleus#cellular_component,	1#Pfam#PF00125#Core histone H2A/H2B/H3/H4,	0,1.52,32.26,0,0,0,5.62,17.66,7.76,0,0.00,0.78	5.46667	9.94846	-0.549499	-0.396711	2.69321	-0.549499	-0.549499	-0.549499	0.0154128	1.22565	0.230521	-0.549499	-0.549499	-0.471095	H2A	MSGRGKGGKQRAKAKSRSARAGLQFPVGRVHRFLRKGNYAERVGAGAPVYLAAVMEYLAAEILELAGNAARDNKKTRINPRHLQLAIRNDEELNKLLSGVTIAQGGVLPNIQAVLLPKKTASKAAK*
cots2s	S	oki.27.48	20.14	0	1	1		160580	oki.27.48	disabled homolog 2-interacting protein	gi|780174796|ref|XP_003728444.2|#PREDICTED: disabled homolog 2-interacting protein [Strongylocentrotus purpuratus]	19#GO:0005622#intracellular#cellular_component,GO:0046580#negative regulation of Ras protein signal transduction#biological_process,GO:0005737#cytoplasm#cellular_component,GO:0005515#protein binding#molecular_function,GO:0030308#negative regulation of cell growth#biological_process,GO:0071364#cellular response to epidermal growth factor stimulus#biological_process,GO:0043065#positive regulation o…	1#Pfam#PF00616#GTPase-activator protein for Ras-like GTPase,	85.07,64.74,10.52,503,511.39,199.36,64.14,34.51,16.31,10.86,98.89,100.05	141.57	178.577	-0.316391	-0.430236	-0.733859	2.02395	2.07093	0.323615	-0.433596	-0.599519	-0.701436	-0.731955	-0.239001	-0.232505	PH, C2, RasGAP, DUF1866	MNESCGSVFVEEVDEEKEGPARAEGWIKVFEEGIIKYCRRGSYNFLSSLRWQLQFCVLDFKASKLHHFNNELEAALVQENAGSPMVRLNPSRVDYYSRWNHVSMSHLGPNFLKTESSTLPRKLPNYDRLDVSQDGVGRARRKSAPSGGIQMTTDATGQQSKLSGIFPKRMKIALKRTKSVGKFDNKHATLKEEDEESDMTSPNSIKPAHSHESLLLGPQTSLDVFDLSSNDLVIVPLHSSILGQDHCFQITNSHGKKYYSCRSASERDKWMESIRSAIHPEKDHKRRKDSVLRLWVVEGKNVPVKRKYYCEICLDDMLYARTTAKSRGDMVFWGEQFLFTCLPEAKNIKVHLYKEPDKKKRRDKNYVGVVSIPLEPISNRATIEKWYPLTNTSTKGDTP…
cots2s	S	oki.201.3	38.03	7	1	1		14877	gbr.36.82	Histone H2A [Asterias rubens]	gi|390334386|ref|XP_003723914.1|#PREDICTED: late histone H2A.L3-like [Strongylocentrotus purpuratus]	5#GO:0000786#nucleosome#cellular_component,GO:0003677#DNA binding#molecular_function,GO:0006334#nucleosome assembly#biological_process,GO:0046982#protein heterodimerization activity#molecular_function,GO:0005634#nucleus#cellular_component,	1#Pfam#PF00125#Core histone H2A/H2B/H3/H4,	0,0,0,0,0,0,23.39,38.78,118.25,0,0.00,0.00	15.035	34.8	-0.43204	-0.43204	-0.43204	-0.43204	-0.43204	-0.43204	0.240086	0.682328	2.96595	-0.43204	-0.43204	-0.43204	H2A	MTGRGKGGKGKGMGGKARSRSNRAGLQFPVGRVHRFMRKGRYSERIGAGAPVYMAAVLEYLVAEILELAGNAARDNKKTRINPRHLQLAIRNDEELNKMMSGVTIAQGGVLPNIQSVLLPSSKTNKAAKALAAQSQEY*
cots2s	S	oki.201.3	38.03	7	1	1		14877	oki.201.3	Histone H2A [Asterias rubens]	gi|390334386|ref|XP_003723914.1|#PREDICTED: late histone H2A.L3-like [Strongylocentrotus purpuratus]	5#GO:0000786#nucleosome#cellular_component,GO:0003677#DNA binding#molecular_function,GO:0006334#nucleosome assembly#biological_process,GO:0046982#protein heterodimerization activity#molecular_function,GO:0005634#nucleus#cellular_component,	1#Pfam#PF00125#Core histone H2A/H2B/H3/H4,	0,0,0,0,0,0,23.39,38.78,118.25,0,0.00,0.00	15.035	34.8	-0.43204	-0.43204	-0.43204	-0.43204	-0.43204	-0.43204	0.240086	0.682328	2.96595	-0.43204	-0.43204	-0.43204	H2A	MTGRGKGGKGKGMGGKARSRSNRAGLQFPVGRVHRFMRKGRYSERIGAGAPVYMAAVLEYLVAEILELAGNAARDNKKTRINPRHLQLAIRNDEELNKMMSGVTIAQGGVLPNIQSVLLPSSKTNKAAKALAAQSQEY*
cots2s	S	oki.11.110	23.65	7	1	1		13536	gbr.142.30	Histone H2B, gonadal [Asterias rubens]	gi|72160395|ref|XP_792239.1|#PREDICTED: late histone H2B.L3-like [Strongylocentrotus purpuratus]	7#GO:0000786#nucleosome#cellular_component,GO:0003677#DNA binding#molecular_function,GO:0006334#nucleosome assembly#biological_process,GO:0046982#protein heterodimerization activity#molecular_function,GO:0005811#lipid particle#cellular_component,GO:0005634#nucleus#cellular_component,GO:0035267#NuA4 histone acetyltransferase complex#cellular_component,	1#Pfam#PF00125#Core histone H2A/H2B/H3/H4,	0,3.26,93.61,0,3.17,17.54,16.1,40.74,0,0,5.85,3.26	15.2942	27.3829	-0.558531	-0.439478	2.86003	-0.558531	-0.442765	0.082016	0.0294284	0.929261	-0.558531	-0.558531	-0.344893	-0.439478	H2B	MPPKPSGKGQKKAGKAKGAPRTDKKKKRKRKESYGIYIYKVMKQVHPDTGISSRAMSIMNSFVNDIFERIAAEASRLAHYNKKSTITSREVQTAVRLLLPGELAKHAVSEGTKAVTKYTTSK*
cots2s	S	oki.11.110	23.65	7	1	1		13536	oki.11.110	Histone H2B, gonadal [Asterias rubens]	gi|72160395|ref|XP_792239.1|#PREDICTED: late histone H2B.L3-like [Strongylocentrotus purpuratus]	7#GO:0000786#nucleosome#cellular_component,GO:0003677#DNA binding#molecular_function,GO:0006334#nucleosome assembly#biological_process,GO:0046982#protein heterodimerization activity#molecular_function,GO:0005811#lipid particle#cellular_component,GO:0005634#nucleus#cellular_component,GO:0035267#NuA4 histone acetyltransferase complex#cellular_component,	1#Pfam#PF00125#Core histone H2A/H2B/H3/H4,	0,3.26,93.61,0,3.17,17.54,16.1,40.74,0,0,5.85,3.26	15.2942	27.3829	-0.558531	-0.439478	2.86003	-0.558531	-0.442765	0.082016	0.0294284	0.929261	-0.558531	-0.558531	-0.344893	-0.439478	H2B	MPPKPSGKGQKKAGKAKGAPRTDKKKKRKRKESYGIYIYKVMKQVHPDTGISSRAMSIMNSFVNDIFERIAAEASRLAHYNKKSTITSREVQTAVRLLLPGELAKHAVSEGTKAVTKYTTSK
cots2s	S	oki.13.117	23.65	7	1	1		13550	gbr.43.46	histone H2B-II protein [Rhabdopleura compacta]	gi|72160395|ref|XP_792239.1|#PREDICTED: late histone H2B.L3-like [Strongylocentrotus purpuratus]	7#GO:0000786#nucleosome#cellular_component,GO:0003677#DNA binding#molecular_function,GO:0006334#nucleosome assembly#biological_process,GO:0046982#protein heterodimerization activity#molecular_function,GO:0005811#lipid particle#cellular_component,GO:0005634#nucleus#cellular_component,GO:0035267#NuA4 histone acetyltransferase complex#cellular_component,	1#Pfam#PF00125#Core histone H2A/H2B/H3/H4,	0,0,14.78,0,0,0,0,21.85,1.38,0,0.65,0.00	3.22167	7.22148	-0.446123	-0.446123	1.60055	-0.446123	-0.446123	-0.446123	-0.446123	2.57957	-0.255026	-0.446123	-0.356113	-0.446123	H2B	MPPKPSGKGQKKAGKAKGAPRTDKKKKRKRKETYGIYIYKVMKQVHPDTGISSRAMSIMNSFVNDIFERIAAEASRLAHYNKKSTITSREVQTAVRLLLPGELAKHAVSEGTKAVTKYTTSK*
cots2s	S	oki.13.117	23.65	7	1	1		13550	oki.13.117	histone H2B-II protein [Rhabdopleura compacta]	gi|72160395|ref|XP_792239.1|#PREDICTED: late histone H2B.L3-like [Strongylocentrotus purpuratus]	7#GO:0000786#nucleosome#cellular_component,GO:0003677#DNA binding#molecular_function,GO:0006334#nucleosome assembly#biological_process,GO:0046982#protein heterodimerization activity#molecular_function,GO:0005811#lipid particle#cellular_component,GO:0005634#nucleus#cellular_component,GO:0035267#NuA4 histone acetyltransferase complex#cellular_component,	1#Pfam#PF00125#Core histone H2A/H2B/H3/H4,	0,0,14.78,0,0,0,0,21.85,1.38,0,0.65,0.00	3.22167	7.22148	-0.446123	-0.446123	1.60055	-0.446123	-0.446123	-0.446123	-0.446123	2.57957	-0.255026	-0.446123	-0.356113	-0.446123	H2B	MPPKPSGKGQKKAGKAKGAPRTDKKKKRKRKETYGIYIYKVMKQVHPDTGISSRAMSIMNSFVNDIFERIAAEASRLAHYNKKSTITSREVQTAVRLLLPGELAKHAVSEGTKAVTKYTTSK*
cots2s	S	oki.181.27	23.65	7	1	1		13536	gbr.260.12	Histone H2B, gonadal [Asterias rubens]	gi|72160395|ref|XP_792239.1|#PREDICTED: late histone H2B.L3-like [Strongylocentrotus purpuratus]	7#GO:0000786#nucleosome#cellular_component,GO:0003677#DNA binding#molecular_function,GO:0006334#nucleosome assembly#biological_process,GO:0046982#protein heterodimerization activity#molecular_function,GO:0005811#lipid particle#cellular_component,GO:0005634#nucleus#cellular_component,GO:0035267#NuA4 histone acetyltransferase complex#cellular_component,	1#Pfam#PF00125#Core histone H2A/H2B/H3/H4,	0,1.63,37.93,0,0,0,28.98,83.8,6.9,0,0.00,0.00	13.27	25.6517	-0.517314	-0.453771	0.961339	-0.517314	-0.517314	-0.517314	0.612435	2.74952	-0.248326	-0.517314	-0.517314	-0.517314	H2B	MPPKPSGKGQKKAGKAKGAPRTDKKKKRKRKESYGIYIYKVMKQVHPDTGISSRAMSIMNSFVNDIFERIAAEASRLAHYNKKSTITSREVQTAVRLLLPGELAKHAVSEGTKAVTKYTTSK*
cots2s	S	oki.1.78	38.03	7	1	1		13410	gbr.2.173	Histone H2 A.F/Z [Strongylocentrotus purpuratus]	gi|184186115|ref|NP_001116980.1|#histone H2 A.F/Z [Strongylocentrotus purpuratus]	5#GO:0000786#nucleosome#cellular_component,GO:0003677#DNA binding#molecular_function,GO:0006334#nucleosome assembly#biological_process,GO:0046982#protein heterodimerization activity#molecular_function,GO:0005634#nucleus#cellular_component,	1#Pfam#PF00125#Core histone H2A/H2B/H3/H4,	437.13,377.81,2325.35,215.02,195.75,337.39,15215.3,13504.87,506.42,1481.97,239.96,251.81	2924.07	5391.9	-0.461236	-0.472237	-0.11104	-0.502429	-0.506003	-0.479734	2.27958	1.96235	-0.448385	-0.267456	-0.497803	-0.495606	H2A	MAGGKAGKDSGKAKAKAVSRSARAGLQFPVGRIHRHLKNRTTSHGRVGATAAVYSAAILEYLTAEVLELAGNASKDLKVKRITPRHLQLAIRGDEELDSLIKATIAGGGVIPHIHKSLIGKKGSQKAS*
cots2s	S	oki.1.78	38.03	7	1	1		13410	oki.1.78	Histone H2 A.F/Z [Strongylocentrotus purpuratus]	gi|184186115|ref|NP_001116980.1|#histone H2 A.F/Z [Strongylocentrotus purpuratus]	5#GO:0000786#nucleosome#cellular_component,GO:0003677#DNA binding#molecular_function,GO:0006334#nucleosome assembly#biological_process,GO:0046982#protein heterodimerization activity#molecular_function,GO:0005634#nucleus#cellular_component,	1#Pfam#PF00125#Core histone H2A/H2B/H3/H4,	437.13,377.81,2325.35,215.02,195.75,337.39,15215.3,13504.87,506.42,1481.97,239.96,251.81	2924.07	5391.9	-0.461236	-0.472237	-0.11104	-0.502429	-0.506003	-0.479734	2.27958	1.96235	-0.448385	-0.267456	-0.497803	-0.495606	H2A	MAGGKAGKDSGKAKAKAVSRSARAGLQFPVGRIHRHLKNRTTSHGRVGATAAVYSAAILEYLTAEVLELAGNASKDLKVKRITPRHLQLAIRGDEELDSLIKATIAGGGVIPHIHKSLIGKKGSQKAS*
cots2s	S	oki.98.10	39.24	10	1	1		12144	gbr.272.7	Uncharacterised protein							1.54222	-0.489752	-0.682513	1.7888	1.78788	1.78885	-0.496999	-0.939479	-0.402103	-0.447214	-0.575576	-0.932068
cots2s	S	oki.13.116	38.03	7	1	1		13481	gbr.43.47	Histone H2A [Asterias rubens]	gi|780070294|ref|XP_011671468.1|#PREDICTED: late histone H2A.L3 [Strongylocentrotus purpuratus]	5#GO:0000786#nucleosome#cellular_component,GO:0003677#DNA binding#molecular_function,GO:0006334#nucleosome assembly#biological_process,GO:0046982#protein heterodimerization activity#molecular_function,GO:0005634#nucleus#cellular_component,	1#Pfam#PF00125#Core histone H2A/H2B/H3/H4,	0,0,0,0,0,0,0,1.89,1.31,0,0.63,0.00	0.319167	0.636945	-0.50109	-0.50109	-0.50109	-0.50109	-0.50109	-0.50109	-0.50109	2.4662	1.5556	-0.50109	0.488006	-0.50109	H2A	MSGRGKGGKQRAKAKSRSARAGLQFPVGRVHRFLRKGNYAERVGAGAPVYLAAVMEYLAAEILELAGNAARDNKKTRINPRHLQLAIRNDEELNKLLSGVTIAQGGVLPNIQAVLLPKKTSKPAK*
cots2s	S	oki.13.116	38.03	7	1	1		13481	oki.13.116	Histone H2A [Asterias rubens]	gi|780070294|ref|XP_011671468.1|#PREDICTED: late histone H2A.L3 [Strongylocentrotus purpuratus]	5#GO:0000786#nucleosome#cellular_component,GO:0003677#DNA binding#molecular_function,GO:0006334#nucleosome assembly#biological_process,GO:0046982#protein heterodimerization activity#molecular_function,GO:0005634#nucleus#cellular_component,	1#Pfam#PF00125#Core histone H2A/H2B/H3/H4,	0,0,0,0,0,0,0,1.89,1.31,0,0.63,0.00	0.319167	0.636945	-0.50109	-0.50109	-0.50109	-0.50109	-0.50109	-0.50109	-0.50109	2.4662	1.5556	-0.50109	0.488006	-0.50109	H2A	MSGRGKGGKQRAKAKSRSARAGLQFPVGRVHRFLRKGNYAERVGAGAPVYLAAVMEYLAAEILELAGNAARDNKKTRINPRHLQLAIRNDEELNKLLSGVTIAQGGVLPNIQAVLLPKKTSKPAK*
cots2s	S	oki.62.176	23.65	7	1	1		14477	gbr.6.81	cleavage stage histone H2B [Psammechinus miliaris]	gi|72091075|ref|XP_781938.1|#PREDICTED: late histone H2B.L4-like [Strongylocentrotus purpuratus]	5#GO:0000786#nucleosome#cellular_component,GO:0003677#DNA binding#molecular_function,GO:0006334#nucleosome assembly#biological_process,GO:0046982#protein heterodimerization activity#molecular_function,GO:0005634#nucleus#cellular_component,	1#Pfam#PF00125#Core histone H2A/H2B/H3/H4,	0,0,4.2,0,0,0,541.38,722.48,1080.12,0,0.00,0.00	195.682	372.003	-0.526021	-0.526021	-0.514731	-0.526021	-0.526021	-0.526021	0.929288	1.41611	2.3775	-0.526021	-0.526021	-0.526021	H2B	MTKASSRGMGTGEKKAAAKVKAPTATMAGSGKKDKHRKKRKESYNVYIYKVLKQVHPDTGISSRAISIMNSFVNDIFERIASEASRLAQYNKKSTISSREVQTAVRLLLPGELAKHAVSEGTKAVTKYTTTR*
cots2s	S	oki.62.176	23.65	7	1	1		14477	oki.62.176	cleavage stage histone H2B [Psammechinus miliaris]	gi|72091075|ref|XP_781938.1|#PREDICTED: late histone H2B.L4-like [Strongylocentrotus purpuratus]	5#GO:0000786#nucleosome#cellular_component,GO:0003677#DNA binding#molecular_function,GO:0006334#nucleosome assembly#biological_process,GO:0046982#protein heterodimerization activity#molecular_function,GO:0005634#nucleus#cellular_component,	1#Pfam#PF00125#Core histone H2A/H2B/H3/H4,	0,0,4.2,0,0,0,541.38,722.48,1080.12,0,0.00,0.00	195.682	372.003	-0.526021	-0.526021	-0.514731	-0.526021	-0.526021	-0.526021	0.929288	1.41611	2.3775	-0.526021	-0.526021	-0.526021	H2B	MTKASSRGMGTGEKKAAAKVKAPTATMAGSGKKDKHRKKRKESYNVYIYKVLKQVHPDTGISSRAISIMNSFVNDIFERIASEASRLAQYNKKSTISSREVQTAVRLLLPGELAKHAVSEGTKAVTKYTTTR*
cots2s	S	oki.40.47	23.65	7	1	1		13536	gbr.81.62	Histone H2B, gonadal [Asterias rubens]	gi|72160395|ref|XP_792239.1|#PREDICTED: late histone H2B.L3-like [Strongylocentrotus purpuratus]	7#GO:0000786#nucleosome#cellular_component,GO:0003677#DNA binding#molecular_function,GO:0006334#nucleosome assembly#biological_process,GO:0046982#protein heterodimerization activity#molecular_function,GO:0005811#lipid particle#cellular_component,GO:0005634#nucleus#cellular_component,GO:0035267#NuA4 histone acetyltransferase complex#cellular_component,	1#Pfam#PF00125#Core histone H2A/H2B/H3/H4,	0,0,16.26,0,0,0,12.03,9.62,1.38,0,0.00,4.08	3.61417	5.74818	-0.62875	-0.62875	2.19997	-0.62875	-0.62875	-0.62875	1.46409	1.04482	-0.388674	-0.62875	-0.62875	0.0810401	H2B	MPPKPSGKGQKKAGKAKGAPRTDKKKKRKRKESYGIYIYKVMKQVHPDTGISSRAMSIMNSFVNDIFERIAAEASRLAHYNKKSTITSREVQTAVRLLLPGELAKHAVSEGTKAVTKYTTSK*
cots2s	S	oki.11.111	38.03	7	1	1		13531	gbr.142.31	Histone H2A [Asterias rubens]	gi|780070294|ref|XP_011671468.1|#PREDICTED: late histone H2A.L3 [Strongylocentrotus purpuratus]	5#GO:0000786#nucleosome#cellular_component,GO:0003677#DNA binding#molecular_function,GO:0006334#nucleosome assembly#biological_process,GO:0046982#protein heterodimerization activity#molecular_function,GO:0005634#nucleus#cellular_component,	1#Pfam#PF00125#Core histone H2A/H2B/H3/H4,	0,0,18.43,2.06,2.97,9.86,2.81,4.65,2.59,0,4.36,0.00	3.9775	5.35418	-0.742878	-0.742878	2.69929	-0.358132	-0.188171	1.09868	-0.218054	0.125603	-0.259144	-0.742878	0.0714396	-0.742878	H2A	MSGRGKGGKSRAKAKSRSARAGLQFPVGRVHRFLRKGNYAERVGAGAPVYLAAVMEYLAAEILELAGNAARDNKKTRINPRHLQLAIRNDEELNKLLSGVTIAQGGVLPNIQAVLLPKKTSSKATK*
cots2s	S	oki.11.111	38.03	7	1	1		13531	oki.11.111	Histone H2A [Asterias rubens]	gi|780070294|ref|XP_011671468.1|#PREDICTED: late histone H2A.L3 [Strongylocentrotus purpuratus]	5#GO:0000786#nucleosome#cellular_component,GO:0003677#DNA binding#molecular_function,GO:0006334#nucleosome assembly#biological_process,GO:0046982#protein heterodimerization activity#molecular_function,GO:0005634#nucleus#cellular_component,	1#Pfam#PF00125#Core histone H2A/H2B/H3/H4,	0,0,18.43,2.06,2.97,9.86,2.81,4.65,2.59,0,4.36,0.00	3.9775	5.35418	-0.742878	-0.742878	2.69929	-0.358132	-0.188171	1.09868	-0.218054	0.125603	-0.259144	-0.742878	0.0714396	-0.742878	H2A	MSGRGKGGKSRAKAKSRSARAGLQFPVGRVHRFLRKGNYAERVGAGAPVYLAAVMEYLAAEILELAGNAARDNKKTRINPRHLQLAIRNDEELNKLLSGVTIAQGGVLPNIQAVLLPKKTSSKATK*
cots2s	S	*No corresponding oki*	31.95	3	1	1		52224	gbr.60.102	Ependymin
cots2s	S	*No corresponding oki*	31.95	6	1	1		25010	gbr.60.102b	Ependymin
cots2s	S	oki.11.66b	20.14	2	1	1		27421	oki.11.66b	Ependymin
cots2s	S	oki.141.73a	31.95	9	1	1		15619	oki.141.73a	Ependymin
cots2s	S	*No corresponding oki*	38.03	13	1	1		7284	gbr.2697.2	Histone H2A [Asterias rubens]																			H2A	MSGRGKGGKAKGKAKSRSSRAGLQFPVGRIHRLLRKGNYAERVGAGAPVYLAAVMEYLAAEVLELAGNAA
cots2s	S	*No corresponding oki*	38.03	7	1	1		13526	gbr.81.61	Histone H2A [Asterias rubens]																			H2A	MSGRGKGGKQRAKAKSRSARAGLQFPVGRVHRFLRKGNYAERVGAGAPVYLAAVMEYLAAEILELAGNAARDNKKTRINPRHLQLAIRNDEELNKLLSGVTIAQGGVLPNIQAVLLPKKTASKAAK*
cots2s	S	*No corresponding oki*	38.03	7	1	1		14086	gbr.1356.1	histone H2A type 1-like isoform X2 [Xenopus (Silurana) tropicalis]																			H2A	MSGKGGKSKSGKVGAKSKTRSSRAGLQFPVGRIHRFIRKGNYAERVGAGAPVYLAAVLEYLTAEILELAGNAARDNKKSRIIPRHLQLAIRNDEELNKLLQGVTIAQGGVLPNIQSVLLPKKQSSSQPKSK*
cots2s	S	*No corresponding oki*	23.65	7	1	1		13777	gbr.2697.1	Histone H2B [Urechis caupo]																			H2B	MPPKPASKGAKKAASKAKAARTTDKKKRRRRRESYSIYIYKVLKQVHPDTGISSKAMSIMNSFVNDIFERIAAEASRLAHYNRRSTITSREIQTAVRLLLPGELAKHAVSEGTKAVTKYTQSK*
cots2s	S	*No corresponding oki*	23.65	11	1	1		8973	gbr.1356.4	histone H2B 5-like [Anolis carolinensis]																			H2B	VLKQVHPDTGISSKAMSIMNSFVNDIFERIAGEASRLAHYNKRSTISSREIQTAVRLLLPGELAKHAVSEGTKAVTKYTSSK*
cots3c	R	oki.185.68	212.26	15	24	4	Carbamidomethylation	184077	oki.185.68	vitellogenin [Parvulastra exigua]	gi|780119307|ref|XP_011677674.1|#PREDICTED: uncharacterized protein LOC583660 [Strongylocentrotus purpuratus]	3#GO:0045735#nutrient reservoir activity#molecular_function,GO:0005319#lipid transporter activity#molecular_function,GO:0006869#lipid transport#biological_process,	3#Pfam#PF09172#Domain of unknown function (DUF1943),Pfam#PF00094#von Willebrand factor type D domain,Pfam#PF01347#Lipoprotein amino terminal region,	22.11,34.8,47.76,20.61,181.68,179.02,8.01,4.72,184.52,3834.13,33.51,79.06	385.827	1088.17	-0.334248	-0.322586	-0.310676	-0.335627	-0.187607	-0.190051	-0.347206	-0.350229	-0.184997	3.16891	-0.323772	-0.281912
cots3c	R	oki.185.68	197.11	17	21	1	Carbamidomethylation	133746	gbr.198.25	vitellogenin [Parvulastra exigua]	gi|780119307|ref|XP_011677674.1|#PREDICTED: uncharacterized protein LOC583660 [Strongylocentrotus purpuratus]	3#GO:0045735#nutrient reservoir activity#molecular_function,GO:0005319#lipid transporter activity#molecular_function,GO:0006869#lipid transport#biological_process,	3#Pfam#PF09172#Domain of unknown function (DUF1943),Pfam#PF00094#von Willebrand factor type D domain,Pfam#PF01347#Lipoprotein amino terminal region,	22.11,34.8,47.76,20.61,181.68,179.02,8.01,4.72,184.52,3834.13,33.51,79.06	385.827	1088.17	-0.334248	-0.322586	-0.310676	-0.335627	-0.187607	-0.190051	-0.347206	-0.350229	-0.184997	3.16891	-0.323772	-0.281912
cots3c	R	oki.27.35	207.66	14	17	17	Carbamidomethylation; Sodium adduct	150661	oki.27.35	Plancitoxin-1 [Acanthaster planci]	gi|780067770|ref|XP_003725560.2|#PREDICTED: plancitoxin-1 isoform X2 [Strongylocentrotus purpuratus]	6#GO:0005576#extracellular region#cellular_component,GO:0000737#"DNA catabolic process, endonucleolytic"#biological_process,GO:0006259#DNA metabolic process#biological_process,GO:0004531#deoxyribonuclease II activity#molecular_function,GO:0090305#nucleic acid phosphodiester bond hydrolysis#biological_process,GO:0006915#apoptotic process#biological_process,	1#Pfam#PF03265#Deoxyribonuclease II,	16.15,48.42,0.62,6.29,7.92,7.69,0.12,0.29,4.54,0,16.66,15.74	10.37	13.5603	0.426244	2.80598	-0.71901	-0.300878	-0.180674	-0.197636	-0.755883	-0.743346	-0.429931	-0.764732	0.463854	0.396009
cots3c	R	oki.8.264	125.83	35	7	3	Carbamidomethylation; Deamidation (NQ); Dehydration	17667	gbr.558.1	Phospholipase A2 AP-PLA2-II; [Acanthaster planci]	gi|780176033|ref|XP_003724325.2|#PREDICTED: phospholipase A2-like [Strongylocentrotus purpuratus]	8#GO:0016042#lipid catabolic process#biological_process,GO:0005576#extracellular region#cellular_component,GO:0006644#phospholipid metabolic process#biological_process,GO:0019835#cytolysis#biological_process,GO:0009395#phospholipid catabolic process#biological_process,GO:0004623#phospholipase A2 activity#molecular_function,GO:0005509#calcium ion binding#molecular_function,GO:0044179#hemolysis in …	1#Pfam#PF00068#Phospholipase A2,	0,2189.5,3.11,1.39,0,4.44,0,0,0,0,3.36,0.00	183.483	631.733	-0.290444	3.17542	-0.285521	-0.288244	-0.290444	-0.283416	-0.290444	-0.290444	-0.290444	-0.290444	-0.285126	-0.290444
cots3c	R	*No corresponding oki*	136.87	37	6	1	Carbamidomethylation; Deamidation (NQ); Dehydration	16318	gbr.558.4	Phospholipase A2 AP-PLA2-II [Acanthaster planci]
cots3c	R	oki.8.262	63.78	12	3	3	Carbamidomethylation	22517	oki.8.262	Phospholipase A2 AP-PLA2-II; [Acanthaster planci]	gi|780176033|ref|XP_003724325.2|#PREDICTED: phospholipase A2-like [Strongylocentrotus purpuratus]	8#GO:0016042#lipid catabolic process#biological_process,GO:0005576#extracellular region#cellular_component,GO:0006644#phospholipid metabolic process#biological_process,GO:0019835#cytolysis#biological_process,GO:0009395#phospholipid catabolic process#biological_process,GO:0004623#phospholipase A2 activity#molecular_function,GO:0005509#calcium ion binding#molecular_function,GO:0044179#hemolysis in …	1#Pfam#PF00068#Phospholipase A2,	0,2605.06,0,1.82,2.06,4.38,0,0.41,2.18,94.91,2.47,1.32	226.218	749.624	-0.301775	3.17338	-0.301775	-0.299347	-0.299027	-0.295932	-0.301775	-0.301228	-0.298867	-0.175165	-0.29848	-0.300014
cots3c	R	oki.111.24	54.11	8	2	2	Carbamidomethylation	27145	gbr.283.2	Uncharacterised protein							-0.743695	0.522674	0.520617	-0.451039	-0.440512	-0.445068	-0.290706	-0.193735	-0.0254602	-0.447214	0.0522292	-0.954838
cots3c	R	oki.83.49	62.1	0	2	2	Phosphorylation (STY)	541013	gbr.504.1	deleted in malignant brain tumors 1 protein [Gallus gallus]	gi|780114328|ref|XP_011676986.1|#PREDICTED: uncharacterized protein LOC583353 [Strongylocentrotus purpuratus]	25#GO:0043627#response to estrogen#biological_process,GO:0005515#protein binding#molecular_function,GO:0019048#modulation by virus of host morphology or physiology#biological_process,GO:0005576#extracellular region#cellular_component,GO:0030858#positive regulation of epithelial cell differentiation#biological_process,GO:0005578#proteinaceous extracellular matrix#cellular_component,GO:0007155#cell…	3#Pfam#PF00530#Scavenger receptor cysteine-rich domain,Pfam#PF00008#EGF-like domain,Pfam#PF00754#F5/8 type C domain,	0.49,5.81,7.47,2.36,2.72,6.26,1.07,3.03,9.65,10.62,4.20,4.30	4.83167	3.22174	-1.34762	0.303667	0.818917	-0.767185	-0.655444	0.443343	-1.16759	-0.559222	1.49557	1.79665	-0.196064	-0.165025
cots3c	R	*No corresponding oki*	76.97	6	2	2	Carbamidomethylation	52224	gbr.60.102	Ependymin																			Signal	MDIKLAALLLLVGLATSYAQPAEGPCCFPDQFVVGVDSEAFLGQGYPWQLEEEQSRESASKIQPEGVVLGSETAVGGRGGTKRLAIVGQSAVDVNKNMIGNEFTLFQSDEERPSRQRLIYDYEQGFQYIIDTDELKCSKTKLQGDIPRCVPPGVDFNTTVYLGDRQLFIDSYHYQIQQLFKNGRSSVSVTKEGCIPNSASFSGTTFRTSILSFAGYFNYEAGIADPDRFFEVPEYCPTSVVILDGVNNGLAVSYAQPAEGPCCFPDQFEVGYGSETAVGGRGGTKRLALVGQAAIDVTKNMIGNEFMLFQSDEERPSRQRLVQDYEQGFQYIIDTDELKCSKTKLQGDIPHCVPPGVDFNTTVYLGDRQLFIDSYHYQIQQLFKNGRSSVSVTKEGCIP…
cots3c	R	*No corresponding oki*	76.97	13	2	2	Carbamidomethylation	25010	gbr.60.102b	Ependymin
cots3c	R	oki.90.29	42.34	3	1	1		41860	oki.90.29	Actin, cytoplasmic [Pisaster ochraceus]"	gi|336455060|ref|NP_001032234.2|#actin, cytoskeletal 1B [Strongylocentrotus purpuratus]	3#GO:0005737#cytoplasm#cellular_component,GO:0005856#cytoskeleton#cellular_component,GO:0005524#ATP binding#molecular_function,	1#Pfam#PF00022#Actin,	564.31,1057.25,23.34,696.22,708.11,524.84,188.48,142.84,599.43,1528.33,325.99,251.80	550.912	423.946	0.0316039	1.19435	-1.24443	0.342752	0.370798	-0.0614976	-0.8549	-0.962556	0.114445	2.30553	-0.530543	-0.705542
cots3c	R	oki.3.171	42.34	4	1	1		28150	gbr.11.164	actin, cytoplasmic A3a isoform X1 [Bactrocera dorsalis]"	gi|780178325|ref|XP_011661664.1|#PREDICTED: muscle actin isoform X1 [Strongylocentrotus purpuratus]	3#GO:0005737#cytoplasm#cellular_component,GO:0005856#cytoskeleton#cellular_component,GO:0005524#ATP binding#molecular_function,	2#Pfam#PF00022#Actin,Pfam#PF03997#VPS28 protein,	56.69,104.49,25.31,60.62,66.96,75.32,20.09,41.67,157.94,77.5,89.36,68.76	70.3925	36.8624	-0.37172	0.924993	-1.22299	-0.265107	-0.0931165	0.133673	-1.3646	-0.779181	2.37498	0.192811	0.514548	-0.0442863	Actin	MCDEETAALVIDNGSGMCKAGFAGDDAPRAVFPSIVGRPRHQGVMVGMGQKDNYVGEEAQNKRGILTLKYPIEHGVVTNWDDMERVWHHTFYNELRVAPEEHPILLTEAPLNPKGNREKMVQIMFETFSSPACYVAIQAVLSLYSSGRTTGIVLDSGDGVSHTVPIYEGYALPHAICRLDLAGRDMTDYMTKIMTERGYSFTTTAEREIVRDIKEKLCYVALDYEQEMKISIGSSSIEKSYELPDGQIITIGK*
cots3c	R	oki.3.171	42.34	2	1	1		55588	oki.3.171	actin, cytoplasmic A3a isoform X1 [Bactrocera dorsalis]"	gi|780178325|ref|XP_011661664.1|#PREDICTED: muscle actin isoform X1 [Strongylocentrotus purpuratus]	3#GO:0005737#cytoplasm#cellular_component,GO:0005856#cytoskeleton#cellular_component,GO:0005524#ATP binding#molecular_function,	2#Pfam#PF00022#Actin,Pfam#PF03997#VPS28 protein,	56.69,104.49,25.31,60.62,66.96,75.32,20.09,41.67,157.94,77.5,89.36,68.76	70.3925	36.8624	-0.37172	0.924993	-1.22299	-0.265107	-0.0931165	0.133673	-1.3646	-0.779181	2.37498	0.192811	0.514548	-0.0442863	Pfam:VPS28	MIMTIMMLRYYRYMHVHVAKAVSWETGFQTYGKEVKLFRNFREREKYDNMAELFAVINTLQWLEKAYIRDAITPKEYTAACSKLLVQYKAAFKQVQSDQIPTVETFMKKYRMDCPAAMERIKEDRPITIKNDDGNTSECIAQIVSLFITVMDKLRLDMKAVDEIEPELRELSETMNKMTLLTDDYQGKEKVNSWLKTMSSMRASDELDEDQIRQLLHDLDSAYQSFIRLLGTGSMCDEETAALVIDNGSGMCKAGFAGDDAPRAVFPSIVGRPRHQGVMVGMGQKDNYVGEEAQNKRGILTLKYPIEHGVVTNWDDMERVWHHTFYNELRVAPEEHPILLTEAPLNPKGNREKMVQIMFETFSSPACYVAIQAVLSLYSSGRTTGIVLDSGDGVSHTVP…
cots3c	R	oki.90.30	42.34	3	1	1		43994	gbr.44.8	beta-actin [Patiria pectinifera]	gi|115918029|ref|XP_001176242.1|#PREDICTED: actin-15B [Strongylocentrotus purpuratus]	3#GO:0005737#cytoplasm#cellular_component,GO:0005856#cytoskeleton#cellular_component,GO:0005524#ATP binding#molecular_function,	1#Pfam#PF00022#Actin,	13.35,26.82,0.82,6.62,10.53,11.79,0.81,5.31,10.42,63.55,1.53,2.79	12.8617	17.5629	0.0278049	0.794763	-0.685632	-0.35539	-0.132761	-0.0610188	-0.686201	-0.429979	-0.139024	2.88611	-0.645205	-0.573463	Actin	MCDDDVAALVIDNGSGMCKAGFAGDDAPRAVFPSIVGRPLHQANITLTILIKNFTLFVDNKPVMVGMGLKDRYVGDEAQSKRGILSIKYPIEHGIVTNWDDMEKIWHHTFYNELRVGPDEYSVLLTEAPLNPKANREKMAQTMFETFNTPAMYVAIQAVLSLYASGRTTGIVFDSGDGVSHTVPIYEGYALPHAIFRLDFAGGELTDYLMKILTERSYRLFTTAEREIVREIKEKLCYVAVDFEQEMQTAASSSSLEQSHKLPDGQVITIGNERFRTPEALFQPALLGEEFPGIDGTIYNSIMKCALDIRRDLFTSIVLSGGSTMFPGIADRMQKEITALAPPDLEIKIITPPERKYSVWIGGSILASLSTFQQMWISKQEYDESGPSIVHCKCF*
cots3c	R	oki.90.30	42.34	3	1	1		43962	oki.90.30	beta-actin [Patiria pectinifera]	gi|115918029|ref|XP_001176242.1|#PREDICTED: actin-15B [Strongylocentrotus purpuratus]	3#GO:0005737#cytoplasm#cellular_component,GO:0005856#cytoskeleton#cellular_component,GO:0005524#ATP binding#molecular_function,	1#Pfam#PF00022#Actin,	13.35,26.82,0.82,6.62,10.53,11.79,0.81,5.31,10.42,63.55,1.53,2.79	12.8617	17.5629	0.0278049	0.794763	-0.685632	-0.35539	-0.132761	-0.0610188	-0.686201	-0.429979	-0.139024	2.88611	-0.645205	-0.573463	Actin	MCDDDVAALVIDNGSGMCKAGFAGDDAPRAVFPSIVGRPLHQANITLTILIKNFTLFVDNKPVMVGMGLKDRYVGDEAQSKRGILSIKYPIEHGIVTNWDDMEKIWHHTFYNELRVGPDEYPVLLTEAPLNPKANREKMAQTMFETFNTPAMYVAIQAVLSLYASGRTTGIVFDSGDGVSHTVPIYEGYALPHAIFRLDFAGGELTDYLMKILTERSYRLFTTAEREIVREIKEKLCYVAVDFEQEMQTAASSSSLEQSHKLPDGQVITIGNERFRTPEALFQPALLGEEFPGIDGTIYNSIMKCALDIRRDLFASIVLSGGSTMFPGIADRMQKEITALAPPDLEIKIITPPERKYSVWIGGSTLASLSTFQQMWISKQEYDESGPSIVHCKCF*
cots3c	R	oki.90.35	47.61	3	1	1		38696	gbr.44.14	Actin, cytoplasmic [Pisaster ochraceus]"	gi|336455060|ref|NP_001032234.2|#actin, cytoskeletal 1B [Strongylocentrotus purpuratus]	3#GO:0005737#cytoplasm#cellular_component,GO:0005856#cytoskeleton#cellular_component,GO:0005524#ATP binding#molecular_function,	1#Pfam#PF00022#Actin,	5568.25,9150.87,176.44,3394.24,3499.75,4296.77,1126.28,1432.08,2800.86,19025.45,7798.79,5854.88	5343.72	5068.39	0.0442997	0.751155	-1.01951	-0.384635	-0.363818	-0.206565	-0.832106	-0.771772	-0.50171	2.69942	0.484388	0.100852
cots3c	R	oki.90.35	47.61	3	1	1		38726	oki.90.35	Actin, cytoplasmic [Pisaster ochraceus]"	gi|336455060|ref|NP_001032234.2|#actin, cytoskeletal 1B [Strongylocentrotus purpuratus]	3#GO:0005737#cytoplasm#cellular_component,GO:0005856#cytoskeleton#cellular_component,GO:0005524#ATP binding#molecular_function,	1#Pfam#PF00022#Actin,	5568.25,9150.87,176.44,3394.24,3499.75,4296.77,1126.28,1432.08,2800.86,19025.45,7798.79,5854.88	5343.72	5068.39	0.0442997	0.751155	-1.01951	-0.384635	-0.363818	-0.206565	-0.832106	-0.771772	-0.50171	2.69942	0.484388	0.100852	Actin	MEAFMDTILKGVMVGMGQKDSYVGDEAQSKRGILTLKYPIEHGIVTNWDDMEKIWHHTFYNELRVAPEEHPVLLTEAPLNPKANREKMTQIMFETFNTPAMYVAIQAVLSLYASGRTTGIVFDSGDGVSHTVPIYEGYALPHAILRLDLAGRDLTDYLMKILTERGYSFTTTAEREIVRDIKEKLCYVALDFEQEMQTAASSSSLEKSYELPDGQVITIGNERFRDPEALFQPSFLGMETAGIHETTYNSIMKCDVDIRKDLYANTVLSGGSTMFPGIADRMQKEITALAPPTMKIKIIAPPERKYSVWIGGSILASLSTFQQMWISKQEYDESGPSIVHRKCF*
cots3c	R	oki.12.137	42.34	3	1	1		41954	gbr.3.50	Actin, cytoplasmic [Pisaster ochraceus]"	gi|780178325|ref|XP_011661664.1|#PREDICTED: muscle actin isoform X1 [Strongylocentrotus purpuratus]	3#GO:0005737#cytoplasm#cellular_component,GO:0005856#cytoskeleton#cellular_component,GO:0005524#ATP binding#molecular_function,	1#Pfam#PF00022#Actin,	17255.46,2334.94,182.13,284.25,323.5,428.61,54,57.18,311.06,3034.88,3222.67,4556.42	2670.43	4847.6	3.00871	-0.0692065	-0.513305	-0.492239	-0.484142	-0.462459	-0.539737	-0.539081	-0.486708	0.0751826	0.113921	0.389058
cots3c	R	oki.12.137	42.34	3	1	1		41954	oki.12.137	Actin, cytoplasmic [Pisaster ochraceus]"	gi|780178325|ref|XP_011661664.1|#PREDICTED: muscle actin isoform X1 [Strongylocentrotus purpuratus]	3#GO:0005737#cytoplasm#cellular_component,GO:0005856#cytoskeleton#cellular_component,GO:0005524#ATP binding#molecular_function,	1#Pfam#PF00022#Actin,	17255.46,2334.94,182.13,284.25,323.5,428.61,54,57.18,311.06,3034.88,3222.67,4556.42	2670.43	4847.6	3.00871	-0.0692065	-0.513305	-0.492239	-0.484142	-0.462459	-0.539737	-0.539081	-0.486708	0.0751826	0.113921	0.389058
cots3c	R	oki.164.18	42.34	3	1	1		42184	oki.164.18	act protein isoform X1 [Ciona intestinalis]	gi|47550921|ref|NP_999634.1|#actin related protein 1 [Strongylocentrotus purpuratus]	3#GO:0005737#cytoplasm#cellular_component,GO:0005856#cytoskeleton#cellular_component,GO:0005524#ATP binding#molecular_function,	1#Pfam#PF00022#Actin,	2.78,12.7,0,9.57,10.54,3.68,0,10.81,0.25,273.25,4.31,9.65	28.1283	77.3334	-0.32778	-0.199504	-0.363728	-0.239978	-0.227435	-0.316142	-0.363728	-0.223944	-0.360495	3.16967	-0.307995	-0.238944	Actin	MSAFEDDDICPLVVDNGSGMCKAGFAGDDAPRAVFPAVVGRPRHEVMMVGMGKKDSYIGDEAQSKRGILTLKYPIEHGIVTNWDDMEKIWHHTFYNELRVAPEEHPVLLTEAPLNPKANREKMTQIMFETFNVPAMYVSIQAVLSLYSSGRTTGVVFDSGDGVSHVVPIYEGYSLPHAIQRLDLAGRDLTDYLMVILSERGYAFSSSAEREIVRDIKEKLCYLALDFDQEMVTAQSSSSVEKSYELPDGQTITIGNERFRCPEVLFQPSLIGMESAGIHEVLYNSVMKCDMDIRRDMYANVVMSGGSTMFPGTADRMSKELTALVPPSSKVKIIAPPERKYSVWIGGSILASLSTFGQMWISKQEYDENGPGIVHRKCF*
cots3c	R	oki.98.10	43.74	10	1	1		12144	gbr.272.7	Uncharacterised protein							1.54222	-0.489752	-0.682513	1.7888	1.78788	1.78885	-0.496999	-0.939479	-0.402103	-0.447214	-0.575576	-0.932068
cots3c	R	oki.12.167	21.77	0	1	1		261008	oki.12.167	fidgetin-like protein 1-like [Strongylocentrotus purpuratus]	gi|780032617|ref|XP_011666909.1|#PREDICTED: fidgetin-like protein 1 isoform X1 [Strongylocentrotus purpuratus]	10#GO:0016787#hydrolase activity#molecular_function,GO:0008568#microtubule-severing ATPase activity#molecular_function,GO:0031122#cytoplasmic microtubule organization#biological_process,GO:0005515#protein binding#molecular_function,GO:0046034#ATP metabolic process#biological_process,GO:0005524#ATP binding#molecular_function,GO:0000228#nuclear chromosome#cellular_component,GO:0000287#magnesium ion…	3#Pfam#PF15276#Protein phosphatase 1 binding,Pfam#PF00004#ATPase family associated with various cellular activities (AAA),Pfam#PF00498#FHA domain,	16.31,11.29,105.34,2.84,2.24,5.42,188.31,125.51,15.1,9.48,30.28,22.36	44.54	60.8088	-0.464242	-0.546796	0.999855	-0.685756	-0.695623	-0.643328	2.36429	1.33155	-0.48414	-0.576561	-0.234505	-0.36475	AAA, FHA domain	MSEATKSESESFILHKWQKCHFDLHGPQASPRVKIDAVTGILQQIYQASAIGRINSDVSCDLTQRYIQAHSSVVDSVNSETESEAWNPSLTPENVKNLPFIQQFLQFSKANAQSNKPDRLNDPLILHQKNCGRQKRLAEPQPSANQPSARDHSANESNGISSSHANKLPVTKTPSQQSQEHQSSFPTVRSMTSSTNTAKYPLGQSSTKQGLWGQGQTDNRQPPQMSTVSRIPNLVVNSRGNYAVTPSVQERPTTIPQSDPTILHNHVPAFSSRSTSNWNQSNGLINENPGPAYDRDIPKSSGFHTHQGYRPSGPTSHVAPPNSLKRKTMFQEVEFQGDGQLPFRTSIPERTGCADGRFNEGQGARHMENDDDTSAVPNAFKTASEQLIIQNQKKYGNRA…
cots3c	R	oki.85.28	65.31	10	1	1		14816	gbr.207.8	Uncharacterised protein							0.479478	-0.745092	1.52692	-0.457895	-0.48409	-0.444061	1.7817	0.879503	0.0513413	-0.447214	1.70879	1.45376
cots3c	R	*No corresponding oki*	42.34	3	1	1		41860	gbr.44.7	Actin, cytoplasmic [Pisaster ochraceus]																			Actin	MCDDDVAALVIDNGSGMCKAGFAGDDAPRAVFPSIVGRPRHQGVMVGMGQKDSYVGDEAQSKRGILTLKYPIEHGIVTNWDDMEKIWHHTFYNELRVAPEEHPVLLTEAPLNPKANREKMTQIMFETFNTPAMYVAIQAVLSLYASGRTTGIVFDSGDGVSHTVPIYEGYALPHAILRLDLAGRDLTDYLMKILTERGYSFTTTAEREIVRDIKEKLCYVALDFEQEMHTAASSSSLEKSYELPDGQVITIGNERFRSPEAMFQPAFLGMESSGIHETTYNSIMKCDVDIRKDLYANTVLSGGSTMFPGIADRMQKEVTALAPPTMKIKIIAPPERKYSVWIGGSILASLSTFQQMWISKQEYDESGPSIVHRKCF*
cots3c	R	*No corresponding oki*	42.34	3	1	1		42184	gbr.33.9	cytoskeletal actin 2 [Molgula occulta]																			Actin	MSAFEDDDICPLVVDNGSGMCKAGFAGDDAPRAVFPAVVGRPRHEVMMVGMGKKDSYIGDEAQSKRGILTLKYPIEHGIVTNWDDMEKIWHHTFYNELRVAPEEHPVLLTEAPLNPKANREKMTQIMFETFNVPAMYVSIQAVLSLYSSGRTTGVVFDSGDGVSHVVPIYEGYSLPHAIQRLDLAGRDLTDYLMVILSERGYAFSSSAEREIVRDIKEKLCYLALDFDQEMVTAQSSSSVEKSYELPDGQTITIGNERFRCPEVLFQPSLIGMESAGIHEVLYNSVMKCDMDIRRDMYANVVMSGGSTMFPGTADRMSKELTALVPPSSKVKIIAPPERKYSVWIGGSILASLSTFGQMWISKQEYDENGPGIVHRKCF*
cots3s	S	oki.27.35	215.04	15	19	17	Carbamidomethylation; Sodium adduct; HexNAc2	150661	oki.27.35	Plancitoxin-1; AltName: Full=Plancitoxin I; Short=Plan-I; Contains: RecName: Full=Plancitoxin-1 subunit alpha; Contains: RecName: Full=Plancitoxin-1 subunit beta; Flags: Precursor [Acanthaster planci]	gi|780067770|ref|XP_003725560.2|#PREDICTED: plancitoxin-1 isoform X2 [Strongylocentrotus purpuratus]	6#GO:0005576#extracellular region#cellular_component,GO:0000737#"DNA catabolic process, endonucleolytic"#biological_process,GO:0006259#DNA metabolic process#biological_process,GO:0004531#deoxyribonuclease II activity#molecular_function,GO:0090305#nucleic acid phosphodiester bond hydrolysis#biological_process,GO:0006915#apoptotic process#biological_process,	1#Pfam#PF03265#Deoxyribonuclease II,	16.15,48.42,0.62,6.29,7.92,7.69,0.12,0.29,4.54,0,16.66,15.74	10.37	13.5603	0.426244	2.80598	-0.71901	-0.300878	-0.180674	-0.197636	-0.755883	-0.743346	-0.429931	-0.764732	0.463854	0.396009
cots3s	S	oki.185.68	173.7	10	16	4	Carbamidomethylation	184077	oki.185.68	vitellogenin [Parvulastra exigua]	gi|780119307|ref|XP_011677674.1|#PREDICTED: uncharacterized protein LOC583660 [Strongylocentrotus purpuratus]	3#GO:0045735#nutrient reservoir activity#molecular_function,GO:0005319#lipid transporter activity#molecular_function,GO:0006869#lipid transport#biological_process,	3#Pfam#PF09172#Domain of unknown function (DUF1943),Pfam#PF00094#von Willebrand factor type D domain,Pfam#PF01347#Lipoprotein amino terminal region,	22.11,34.8,47.76,20.61,181.68,179.02,8.01,4.72,184.52,3834.13,33.51,79.06	385.827	1088.17	-0.334248	-0.322586	-0.310676	-0.335627	-0.187607	-0.190051	-0.347206	-0.350229	-0.184997	3.16891	-0.323772	-0.281912
cots3s	S	oki.185.68	157.38	12	14	2	Carbamidomethylation	133746	gbr.198.25	vitellogenin [Parvulastra exigua]	gi|780119307|ref|XP_011677674.1|#PREDICTED: uncharacterized protein LOC583660 [Strongylocentrotus purpuratus]	3#GO:0045735#nutrient reservoir activity#molecular_function,GO:0005319#lipid transporter activity#molecular_function,GO:0006869#lipid transport#biological_process,	3#Pfam#PF09172#Domain of unknown function (DUF1943),Pfam#PF00094#von Willebrand factor type D domain,Pfam#PF01347#Lipoprotein amino terminal region,	22.11,34.8,47.76,20.61,181.68,179.02,8.01,4.72,184.52,3834.13,33.51,79.06	385.827	1088.17	-0.334248	-0.322586	-0.310676	-0.335627	-0.187607	-0.190051	-0.347206	-0.350229	-0.184997	3.16891	-0.323772	-0.281912
cots3s	S	oki.8.264	162.74	52	11	3	Carbamidomethylation; Deamidation (NQ); Dehydration	17667	gbr.558.1	Phospholipase A2 AP-PLA2-II; [Acanthaster planci]	gi|780176033|ref|XP_003724325.2|#PREDICTED: phospholipase A2-like [Strongylocentrotus purpuratus]	8#GO:0016042#lipid catabolic process#biological_process,GO:0005576#extracellular region#cellular_component,GO:0006644#phospholipid metabolic process#biological_process,GO:0019835#cytolysis#biological_process,GO:0009395#phospholipid catabolic process#biological_process,GO:0004623#phospholipase A2 activity#molecular_function,GO:0005509#calcium ion binding#molecular_function,GO:0044179#hemolysis in …	1#Pfam#PF00068#Phospholipase A2,	0,2189.5,3.11,1.39,0,4.44,0,0,0,0,3.36,0.00	183.483	631.733	-0.290444	3.17542	-0.285521	-0.288244	-0.290444	-0.283416	-0.290444	-0.290444	-0.290444	-0.290444	-0.285126	-0.290444	Signal, PA2c	MKTFLILAMAVALAKAQSTDEITNLVQFGKLVMCLGNIGYTEGLEYDGYGCFCGKGGKGTPVDATDRCCEVHDNCYGQAVEEGKCWSVETYGTTYWYDQSTSGSCSIRCWEEGDYNSLVPRKACKAAICECDRKAAQCFADNRPTFNRKYLNYAKDTC
cots3s	S	*No corresponding oki*	183.07	49	10	1	Carbamidomethylation; Deamidation (NQ); Dehydration; Sodium adduct	16318	gbr.558.4	Phospholipase A2 AP-PLA2-II [Acanthaster planci]
cots3s	S	oki.8.262	73.96	20	5	5	Carbamidomethylation	22517	oki.8.262	Phospholipase A2 AP-PLA2-II; [Acanthaster planci]	gi|780176033|ref|XP_003724325.2|#PREDICTED: phospholipase A2-like [Strongylocentrotus purpuratus]	8#GO:0016042#lipid catabolic process#biological_process,GO:0005576#extracellular region#cellular_component,GO:0006644#phospholipid metabolic process#biological_process,GO:0019835#cytolysis#biological_process,GO:0009395#phospholipid catabolic process#biological_process,GO:0004623#phospholipase A2 activity#molecular_function,GO:0005509#calcium ion binding#molecular_function,GO:0044179#hemolysis in …	1#Pfam#PF00068#Phospholipase A2,	0,2605.06,0,1.82,2.06,4.38,0,0.41,2.18,94.91,2.47,1.32	226.218	749.624	-0.301775	3.17338	-0.301775	-0.299347	-0.299027	-0.295932	-0.301775	-0.301228	-0.298867	-0.175165	-0.29848	-0.300014
cots3s	S	oki.111.24	108.17	16	4	4	Carbamidomethylation; Oxidation (M)	27145	gbr.283.2	Uncharacterised protein							-0.743695	0.522674	0.520617	-0.451039	-0.440512	-0.445068	-0.290706	-0.193735	-0.0254602	-0.447214	0.0522292	-0.954838
cots3s	S	oki.141.73	65.32	14	1	1		9984	oki.141.73	Ependymin							-0.743695	1.51328	-0.682513	-0.441392	-0.396585	-0.451871	-0.496999	-0.939479	1.56002	-0.447214	-0.740001	0.295003	Signal	MDIKSAVLLLLVGLATSYAQPAEGPCCFPDQFEVGYGSETAVGGRGGTKRLALVGQAAIDVTKNMIGNEFMLFQSDEERPSRQRLVQDYEQV*
cots3s	S	oki.90.35	47.06	3	1	1		38696	gbr.44.14	Actin, cytoplasmic [Pisaster ochraceus]"	gi|336455060|ref|NP_001032234.2|#actin, cytoskeletal 1B [Strongylocentrotus purpuratus]	3#GO:0005737#cytoplasm#cellular_component,GO:0005856#cytoskeleton#cellular_component,GO:0005524#ATP binding#molecular_function,	1#Pfam#PF00022#Actin,	5568.25,9150.87,176.44,3394.24,3499.75,4296.77,1126.28,1432.08,2800.86,19025.45,7798.79,5854.88	5343.72	5068.39	0.0442997	0.751155	-1.01951	-0.384635	-0.363818	-0.206565	-0.832106	-0.771772	-0.50171	2.69942	0.484388	0.100852
cots3s	S	oki.90.35	47.06	3	1	1		38726	oki.90.35	Actin, cytoplasmic [Pisaster ochraceus]"	gi|336455060|ref|NP_001032234.2|#actin, cytoskeletal 1B [Strongylocentrotus purpuratus]	3#GO:0005737#cytoplasm#cellular_component,GO:0005856#cytoskeleton#cellular_component,GO:0005524#ATP binding#molecular_function,	1#Pfam#PF00022#Actin,	5568.25,9150.87,176.44,3394.24,3499.75,4296.77,1126.28,1432.08,2800.86,19025.45,7798.79,5854.88	5343.72	5068.39	0.0442997	0.751155	-1.01951	-0.384635	-0.363818	-0.206565	-0.832106	-0.771772	-0.50171	2.69942	0.484388	0.100852
cots3s	S	oki.83.49	58.12	0	1	1		541013	gbr.504.1	deleted in malignant brain tumors 1 protein [Gallus gallus]	gi|780114328|ref|XP_011676986.1|#PREDICTED: uncharacterized protein LOC583353 [Strongylocentrotus purpuratus]	25#GO:0043627#response to estrogen#biological_process,GO:0005515#protein binding#molecular_function,GO:0019048#modulation by virus of host morphology or physiology#biological_process,GO:0005576#extracellular region#cellular_component,GO:0030858#positive regulation of epithelial cell differentiation#biological_process,GO:0005578#proteinaceous extracellular matrix#cellular_component,GO:0007155#cell…	3#Pfam#PF00530#Scavenger receptor cysteine-rich domain,Pfam#PF00008#EGF-like domain,Pfam#PF00754#F5/8 type C domain,	0.49,5.81,7.47,2.36,2.72,6.26,1.07,3.03,9.65,10.62,4.20,4.30	4.83167	3.22174	-1.34762	0.303667	0.818917	-0.767185	-0.655444	0.443343	-1.16759	-0.559222	1.49557	1.79665	-0.196064	-0.165025
cots3s	S	*No corresponding oki*	65.32	3	1	1		52224	gbr.60.102	Ependymin
cots3s	S	*No corresponding oki*	65.32	6	1	1		25010	gbr.60.102b	Ependymin
cots3s	S	oki.141.73a	65.32	9	1	1		15619	oki.141.73a	Ependymin
cots4c	R	oki.185.68	244.04	26	42	10	Carbamidomethylation; Oxidation (M)	184077	oki.185.68	vitellogenin [Parvulastra exigua]	gi|780119307|ref|XP_011677674.1|#PREDICTED: uncharacterized protein LOC583660 [Strongylocentrotus purpuratus]	3#GO:0045735#nutrient reservoir activity#molecular_function,GO:0005319#lipid transporter activity#molecular_function,GO:0006869#lipid transport#biological_process,	3#Pfam#PF09172#Domain of unknown function (DUF1943),Pfam#PF00094#von Willebrand factor type D domain,Pfam#PF01347#Lipoprotein amino terminal region,	22.11,34.8,47.76,20.61,181.68,179.02,8.01,4.72,184.52,3834.13,33.51,79.06	385.827	1088.17	-0.334248	-0.322586	-0.310676	-0.335627	-0.187607	-0.190051	-0.347206	-0.350229	-0.184997	3.16891	-0.323772	-0.281912
cots4c	R	gbr.198.25.t1	236.24	31	35	3	Carbamidomethylation; Oxidation (M)	133746	gbr.198.25	vitellogenin [Parvulastra exigua]
cots4c	R	oki.27.35	216.99	17	23	17	Carbamidomethylation; HexNAc2	150661	oki.27.35	Plancitoxin-1 [Acanthaster planci]	gi|780067770|ref|XP_003725560.2|#PREDICTED: plancitoxin-1 isoform X2 [Strongylocentrotus purpuratus]	6#GO:0005576#extracellular region#cellular_component,GO:0000737#"DNA catabolic process, endonucleolytic"#biological_process,GO:0006259#DNA metabolic process#biological_process,GO:0004531#deoxyribonuclease II activity#molecular_function,GO:0090305#nucleic acid phosphodiester bond hydrolysis#biological_process,GO:0006915#apoptotic process#biological_process,	1#Pfam#PF03265#Deoxyribonuclease II,	16.15,48.42,0.62,6.29,7.92,7.69,0.12,0.29,4.54,0,16.66,15.74	10.37	13.5603	0.426244	2.80598	-0.71901	-0.300878	-0.180674	-0.197636	-0.755883	-0.743346	-0.429931	-0.764732	0.463854	0.396009
cots4c	R	oki.8.264	166.26	49	10	4	Carbamidomethylation	17667	gbr.558.1	Phospholipase A2 AP-PLA2-II; [Acanthaster planci]	gi|780176033|ref|XP_003724325.2|#PREDICTED: phospholipase A2-like [Strongylocentrotus purpuratus]	8#GO:0016042#lipid catabolic process#biological_process,GO:0005576#extracellular region#cellular_component,GO:0006644#phospholipid metabolic process#biological_process,GO:0019835#cytolysis#biological_process,GO:0009395#phospholipid catabolic process#biological_process,GO:0004623#phospholipase A2 activity#molecular_function,GO:0005509#calcium ion binding#molecular_function,GO:0044179#hemolysis in …	1#Pfam#PF00068#Phospholipase A2,	0,2189.5,3.11,1.39,0,4.44,0,0,0,0,3.36,0.00	183.483	631.733	-0.290444	3.17542	-0.285521	-0.288244	-0.290444	-0.283416	-0.290444	-0.290444	-0.290444	-0.290444	-0.285126	-0.290444
cots4c	R	oki.12.137	149.67	26	9	4	Carbamidomethylation; Formylation	41954	gbr.3.50	Actin, cytoplasmic [Pisaster ochraceus]"	gi|780178325|ref|XP_011661664.1|#PREDICTED: muscle actin isoform X1 [Strongylocentrotus purpuratus]	3#GO:0005737#cytoplasm#cellular_component,GO:0005856#cytoskeleton#cellular_component,GO:0005524#ATP binding#molecular_function,	1#Pfam#PF00022#Actin,	17255.46,2334.94,182.13,284.25,323.5,428.61,54,57.18,311.06,3034.88,3222.67,4556.42	2670.43	4847.6	3.00871	-0.0692065	-0.513305	-0.492239	-0.484142	-0.462459	-0.539737	-0.539081	-0.486708	0.0751826	0.113921	0.389058	Actin	MCDEDVAALVVDNGSGMCKAGFAGDDAPRAVFPSIVGRPRHQGVMVGMGQKDSYVGDEAQSKRGILTLKYPIEHGIVTNWDDMEKIWHHTFYNELRVAPEEHPVLLTEAPLNPKANREKMTQIMFETFNSPAMYVAIQAVLSLYASGRTTGIVFDTGDGVSHTVPIYEGYALPHAILRLDLAGRDLTDYLMKILTERGYSFTTTAEREIVRDIKEKLCYCALDFEQEMQTASSSSSLEKSYELPDGQVITIGNERFRCPETLFQPAFIGMESAGIHETTYNSIMKCDIDIRKDLYANTVLSGGTSMYPGIADRMQKEIQALAPPTMKIKIIAPPERKYSVWIGGSILASLSTFQQMWISKQEYDESGPSIVHRKCF*
cots4c	R	oki.12.137	149.67	26	9	4	Carbamidomethylation; Formylation	41954	oki.12.137	Actin, cytoplasmic [Pisaster ochraceus]"	gi|780178325|ref|XP_011661664.1|#PREDICTED: muscle actin isoform X1 [Strongylocentrotus purpuratus]	3#GO:0005737#cytoplasm#cellular_component,GO:0005856#cytoskeleton#cellular_component,GO:0005524#ATP binding#molecular_function,	1#Pfam#PF00022#Actin,	17255.46,2334.94,182.13,284.25,323.5,428.61,54,57.18,311.06,3034.88,3222.67,4556.42	2670.43	4847.6	3.00871	-0.0692065	-0.513305	-0.492239	-0.484142	-0.462459	-0.539737	-0.539081	-0.486708	0.0751826	0.113921	0.389058	Actin	MCDEDVAALVVDNGSGMCKAGFAGDDAPRAVFPSIVGRPRHQGVMVGMGQKDSYVGDEAQSKRGILTLKYPIEHGIVTNWDDMEKIWHHTFYNELRVAPEEHPVLLTEAPLNPKANREKMTQIMFETFNSPAMYVAIQAVLSLYASGRTTGIVFDTGDGVSHTVPIYEGYALPHAILRLDLAGRDLTDYLMKILTERGYSFTTTAEREIVRDIKEKLCYCALDFEQEMQTASSSSSLEKSYELPDGQVITIGNERFRCPETLFQPAFIGMESAGIHETTYNSIMKCDIDIRKDLYANTVLSGGTSMYPGIADRMQKEIQALAPPTMKIKIIAPPERKYSVWIGGSILASLSTFQQMWISKQEYDESGPSIVHRKCF*
cots4c	R	*No corresponding oki*	161.26	46	8	1	Carbamidomethylation	16318	gbr.558.4	Phospholipase A2 AP-PLA2-II [Acanthaster planci]
cots4c	R	oki.8.262	129.03	24	7	7	Carbamidomethylation; Pyro-glu from Q	22517	oki.8.262	Phospholipase A2 AP-PLA2-II; [Acanthaster planci]	gi|780176033|ref|XP_003724325.2|#PREDICTED: phospholipase A2-like [Strongylocentrotus purpuratus]	8#GO:0016042#lipid catabolic process#biological_process,GO:0005576#extracellular region#cellular_component,GO:0006644#phospholipid metabolic process#biological_process,GO:0019835#cytolysis#biological_process,GO:0009395#phospholipid catabolic process#biological_process,GO:0004623#phospholipase A2 activity#molecular_function,GO:0005509#calcium ion binding#molecular_function,GO:0044179#hemolysis in …	1#Pfam#PF00068#Phospholipase A2,	0,2605.06,0,1.82,2.06,4.38,0,0.41,2.18,94.91,2.47,1.32	226.218	749.624	-0.301775	3.17338	-0.301775	-0.299347	-0.299027	-0.295932	-0.301775	-0.301228	-0.298867	-0.175165	-0.29848	-0.300014	Signal, PA2c	MNFLVVIVTTVSLAGAASAGEIQNLYQFGKMVMCLGNLNVLEGLEYNGYGCYCGRGGKGTPLDDTDRCCKQHDECYERATDEMGCWSIETYATTYDYTKSKVSGKCTIKCSSEEGKVHKRKLISPDDNTISRRVRPECQNDVPIWTLSLPTELESDYSRFTIRKKCKAFICECDRIGAQCFADKRSTFNRSLISYTKDKC*
cots4c	R	oki.27.33	123.19	19	7	1	Carbamidomethylation; HexNAc2	37035	oki.27.33	Plancitoxin-1 [Acanthaster planci]	gi|780067764|ref|XP_011671175.1|#PREDICTED: plancitoxin-1 isoform X1 [Strongylocentrotus purpuratus]	6#GO:0005576#extracellular region#cellular_component,GO:0000737#"DNA catabolic process, endonucleolytic"#biological_process,GO:0006259#DNA metabolic process#biological_process,GO:0004531#deoxyribonuclease II activity#molecular_function,GO:0090305#nucleic acid phosphodiester bond hydrolysis#biological_process,GO:0006915#apoptotic process#biological_process,	1#Pfam#PF03265#Deoxyribonuclease II,	1.62,102.88,0,0.45,2.59,4.35,0,0.2,4.01,18.73,1.18,0.98	11.4158	29.2609	-0.334776	3.12582	-0.39014	-0.374761	-0.301626	-0.241477	-0.39014	-0.383305	-0.253097	0.249964	-0.349813	-0.356648	ML, CPW_WPC	MSGAVWCSTAPDYTDTLDMARLKTVQCASAPALATVTDQACLMTRMIMFMLLAVTVFTTITVGTSEAAVTCLDGSEKPVDWVGLAGELLDQLWIYMAGFAFATGVLAFDGISGFWLVHSVPKFPLPASKSYNWPDNAKRYGQTLLCITFEYDQFEKIGQQLKYNYPGVYDSQLPSSLAGDNPSIKDVINGVHVTVAPWNRELSLQSKDGKIFISFNKASKWSLDLYKDWLAHYFKSGLYCETWQNGGRNLNSSCEAGLNVYNVKKVSLKGGSDFKGTKDHSKWAVTTKSGLQWACFGGINRQTSQMYRGGGAVCFEHPDVHKTFYDCVAEYEPCT*
cots4c	R	oki.90.35	128.34	20	6	1		38696	gbr.44.14	Actin, cytoplasmic [Pisaster ochraceus]"	gi|336455060|ref|NP_001032234.2|#actin, cytoskeletal 1B [Strongylocentrotus purpuratus]	3#GO:0005737#cytoplasm#cellular_component,GO:0005856#cytoskeleton#cellular_component,GO:0005524#ATP binding#molecular_function,	1#Pfam#PF00022#Actin,	5568.25,9150.87,176.44,3394.24,3499.75,4296.77,1126.28,1432.08,2800.86,19025.45,7798.79,5854.88	5343.72	5068.39	0.0442997	0.751155	-1.01951	-0.384635	-0.363818	-0.206565	-0.832106	-0.771772	-0.50171	2.69942	0.484388	0.100852	Actin	MVAFMDTILKGVMVGMGQKDSYVGDEAQSKRGILTLKYPIEHGIVTNWDDMEKIWHHTFYNELRVAPEEHPVLLTEAPLNPKANREKMTQIMFETFNTPAMYVAIQAVLSLYASGRTTGIVFDSGDGVSHTVPIYEGYALPHAILRLDLAGRDLTDYLMKILTERGYSFTTTAEREIVRDIKEKLCYVALDFEQEMQTAASSSSLEKSYELPDGQVITIGNERFRDPEALFQPSFLGMETAGIHETTYNSIMKCDVDIRKDLYANTVLSGGSTMFPGIADRMQKEITALAPPTMKIKIIAPPERKYSVWIGGSILASLSTFQQMWISKQEYDESGPSIVHRKCF*
cots4c	R	oki.90.35	128.34	20	6	1		38726	oki.90.35	Actin, cytoplasmic [Pisaster ochraceus]"	gi|336455060|ref|NP_001032234.2|#actin, cytoskeletal 1B [Strongylocentrotus purpuratus]	3#GO:0005737#cytoplasm#cellular_component,GO:0005856#cytoskeleton#cellular_component,GO:0005524#ATP binding#molecular_function,	1#Pfam#PF00022#Actin,	5568.25,9150.87,176.44,3394.24,3499.75,4296.77,1126.28,1432.08,2800.86,19025.45,7798.79,5854.88	5343.72	5068.39	0.0442997	0.751155	-1.01951	-0.384635	-0.363818	-0.206565	-0.832106	-0.771772	-0.50171	2.69942	0.484388	0.100852
cots4c	R	oki.111.24	114.17	23	6	6	Carbamidomethylation; Oxidation (M)	27145	gbr.283.2	Uncharacterised protein							-0.743695	0.522674	0.520617	-0.451039	-0.440512	-0.445068	-0.290706	-0.193735	-0.0254602	-0.447214	0.0522292	-0.954838	Signal, SapB,	MFRTLVVVLLATVAVSVFGKDYPVSKDCNDDPAGCKICVQTYQFMKDSLMNAAFVRTNIEYCKLCTCPFVPKGQPEHGACVDHFNEIYGHVKLFVSMYLDDTRKYCGYICPSARNSSLPSCQPKAVQLREGDTCVLNEDGPVCGVCTGTVVWLKEMLLNKQLIMTADVYLNFYCDLAASPCVRQICRQYVREMNKLAMALGTVLDAKSVCQPMCSSSVTVHTPNLAGAIADFLRHVTEVMDVVAGK*
cots4c	R	oki.258.16	99.19	3	6	6	Carbamidomethylation	183645	oki.258.16	Kielin/chordin-like protein [Asterias rubens]	gi|780069107|ref|XP_011671342.1|#PREDICTED: papilin-like [Strongylocentrotus purpuratus]	5#GO:0030414#peptidase inhibitor activity#molecular_function,GO:0005515#protein binding#molecular_function,GO:0005576#extracellular region#cellular_component,GO:0004869#cysteine-type endopeptidase inhibitor activity#molecular_function,GO:0004867#serine-type endopeptidase inhibitor activity#molecular_function,	3#Pfam#PF00014#Kunitz/Bovine pancreatic trypsin inhibitor domain,Pfam#PF05375#Pacifastin inhibitor (LCMII),Pfam#PF00086#Thyroglobulin type-1 repeat,	2.2,7.13,13.82,3.32,31.19,42.9,1.81,1.45,29.03,1178.08,3.83,2.98	109.812	336.71	-0.319597	-0.304956	-0.285087	-0.316271	-0.233499	-0.198722	-0.320755	-0.321825	-0.239914	3.17266	-0.314756	-0.317281
cots4c	R	oki.162.19	62.46	7	3	3		46333	gbr.234.15	pancreatic triacylglycerol lipase-like [Apis florea] PREDICTED	gi|390348966|ref|XP_781220.3|#PREDICTED: inactive pancreatic lipase-related protein 1 [Strongylocentrotus purpuratus]	11#GO:0004806#triglyceride lipase activity#molecular_function,GO:0050253#retinyl-palmitate esterase activity#molecular_function,GO:0004620#phospholipase activity#molecular_function,GO:0006629#lipid metabolic process#biological_process,GO:0009395#phospholipid catabolic process#biological_process,GO:0005615#extracellular space#cellular_component,GO:0019376#galactolipid catabolic process#biological_…	1#Pfam#PF00151#Lipase,	0,751.26,0,0,0,0,1.81,0.61,1.1,0,3.40,0.00	63.1817	216.691	-0.291575	3.17539	-0.291575	-0.291575	-0.291575	-0.291575	-0.283222	-0.28876	-0.286499	-0.291575	-0.275884	-0.291575	Signal, POLXc, CHAD, ORANGE, DM6, DTW, GDNF, LRRNT, PTN, WSC, ZnF_C3H1, ZnF_NFX	MSGLHCHLITASLVISLMCIMEVCTEVCFKDSSGAVNSELCFSNRLGCWAEDPKLYPRKPSEQDNHFFLYTRNNADSVELKWDDASSLGAFDAQRRTVVVAHGFRSSPDRKGFKGIREAVLREAVSPMCGVPHSPLSSRLSQHLETGPKPVAQCRMVRRAVPCSSSRPNPPRLAPSVWCNQKANQSHCLQLYPDGAVEAPSLSDVNVIMVDWRKAAAGLLKYPQCRVNSRLVGRQLGILLKLLHDHRNLDYAHVHIVGHSLGAHLSGLAGKYLGGQVGRITGLDPAKPDFKDYTHIPDCILDKTDAQFVDIIHSDRGHSVYGLQTAIGHQDFYPNYHKFNQIGCNYFNTLTGCAHTRAVDFFIASVEHLRDPSTECDYSTKPCDGSNCPSSGCPKMGIE…
cots4c	R	oki.162.19	62.46	7	3	3		46407	oki.162.19	pancreatic triacylglycerol lipase-like [Apis florea] PREDICTED	gi|390348966|ref|XP_781220.3|#PREDICTED: inactive pancreatic lipase-related protein 1 [Strongylocentrotus purpuratus]	11#GO:0004806#triglyceride lipase activity#molecular_function,GO:0050253#retinyl-palmitate esterase activity#molecular_function,GO:0004620#phospholipase activity#molecular_function,GO:0006629#lipid metabolic process#biological_process,GO:0009395#phospholipid catabolic process#biological_process,GO:0005615#extracellular space#cellular_component,GO:0019376#galactolipid catabolic process#biological_…	1#Pfam#PF00151#Lipase,	0,751.26,0,0,0,0,1.81,0.61,1.1,0,3.40,0.00	63.1817	216.691	-0.291575	3.17539	-0.291575	-0.291575	-0.291575	-0.291575	-0.283222	-0.28876	-0.286499	-0.291575	-0.275884	-0.291575	Signal, POLXc, CHAD, ORANGE, DM6, DTW, GDNF, LRRNT, PTN, WSC, ZnF_C3H1, ZnF_NFX	MSGLHCHLITASLVISLMCIMEVCTEVCFKDSSDAVNSELCFSNRLGCWAEDPKLYPRKPSEQDNHFFLYTRNNADSVELKWDDASSLGAFDAQRRTVVVAHGFRSSPDRKGFKGIREAVLREAVSPMCGVPHSPLCSRLSQHLETGPKPVAQCRMVRRAVPCSSSRPNPPRLAPSVWCNQKANQSHCLQLYPDGAVEAPSLSDVNVIMVDWRKAAAGLLKYPQCRVNSRLVGRQLGILLKLLHDHRNLDYAHVHIVGHSLGAHLSGLAGKYLGGQVGRITGLDPAKPDFKDYTHIPDCILDKTDAQFVDIIHSDRGHSVYGLQTAIGHQDFYPNYHKFNQIGCNYFNTLTGCAHTRAVDFFIASVEHLRDPSTECDYSTKPCDGSNCPSSGCPKMGIE…
cots4c	R	oki.16.51	86.61	8	3	3		50134	gbr.10.39	hypothetical protein SINV_08538, partial [Solenopsis invicta]"	gi|72065171|ref|XP_791790.1|#PREDICTED: tubulin beta chain [Strongylocentrotus purpuratus]	12#GO:0051258#protein polymerization#biological_process,GO:0005737#cytoplasm#cellular_component,GO:0043234#protein complex#cellular_component,GO:0003924#GTPase activity#molecular_function,GO:0008152#metabolic process#biological_process,GO:0005874#microtubule#cellular_component,GO:0007017#microtubule-based process#biological_process,GO:0006184#obsolete GTP catabolic process#biological_process,GO:0…	2#Pfam#PF03953#Tubulin C-terminal domain,Pfam#PF00091#Tubulin/FtsZ family, GTPase domain,	497.7,814.32,517.81,435.09,412.34,444.77,817.41,573.65,306.97,1668.37,714.54,447.25	637.518	362.374	-0.38584	0.487898	-0.330345	-0.558617	-0.621398	-0.531904	0.496425	-0.17625	-0.912174	2.84472	0.212547	-0.525061	Tublin, Tublin_C	MREIVHLQAGQCGNQIGAKFWEVISDEHGIDPTGTYHGDSDLQLERINVYYNEATGGKYVPRAVLVDLEPGTMDSVRSGPFGQIFRPDNFVFGQSGAGNNWAKGHYTEGAELLVDSVLDVVRKEAESCDCLQGFQLTHSLGGGTGSGMGTLLISKIREEYPDRMMTTFSVVPSPKVSDTVVEPYNATLSVHQLVENTDQTFCIDNEALYDICFRTLKLTTPTYGDLNHLVSATMSGVTTCLRFPGQLNADLRKLAVNMVPFPRLHFFMPGFAPLTSRGSQQYRALTVPELTQQMFDAKNMMAACDPRHGRYLTVAALFRGRMSMKEVDEQMLNVQNKNSSYFVEWIPNNVKTAVCDIPPRGLKMSVTFVGNSTAIQELFKRISEQFTAMFRRKAFLHWY…
cots4c	R	oki.16.51	86.61	3	3	3		138321	oki.16.51	hypothetical protein SINV_08538, partial [Solenopsis invicta]"	gi|72065171|ref|XP_791790.1|#PREDICTED: tubulin beta chain [Strongylocentrotus purpuratus]	12#GO:0051258#protein polymerization#biological_process,GO:0005737#cytoplasm#cellular_component,GO:0043234#protein complex#cellular_component,GO:0003924#GTPase activity#molecular_function,GO:0008152#metabolic process#biological_process,GO:0005874#microtubule#cellular_component,GO:0007017#microtubule-based process#biological_process,GO:0006184#obsolete GTP catabolic process#biological_process,GO:0…	2#Pfam#PF03953#Tubulin C-terminal domain,Pfam#PF00091#Tubulin/FtsZ family, GTPase domain,	497.7,814.32,517.81,435.09,412.34,444.77,817.41,573.65,306.97,1668.37,714.54,447.25	637.518	362.374	-0.38584	0.487898	-0.330345	-0.558617	-0.621398	-0.531904	0.496425	-0.17625	-0.912174	2.84472	0.212547	-0.525061	Tublin, Tublin_C	MREIVHLQAGQCGNQIGAKFWEVISDEHGIDPTGTYHGDSDLQLERINVYYNEATGGKYVPRAVLVDLEPGTMDSVRSGPFGQIFRPDNFVFGQSGAGNNWAKGHYTEGAELVDSVLDMVRKEAESCDCLQGFQLTHSLGGGTGSGMGTLLISKIREEYPDRIMTTFSVVPSPKVSDTVVEPYNATLSVHQLVENTDETFCIDNEALYDICFRTLKLTTPTYGDLNHLVSATMSGVTTCLRFPGQLNADLRKLAVNMVPFPRLHFFMPGFAPLTSRGSQQYRALTVPELTQQMFDAKNMMAACDPRHGRYLTVAAMFRGRMSMKEVDEQMLNVQNKNSSYFVEWIPNNVKTAVCDIPPRGLKMSVTFIGNSTAIQELFKRISEQFTAMFRRKAFLHWYT…
cots4c	R	oki.16.53	86.61	4	3	3		95398	oki.16.53	Tubulin beta chain isoform 2 [Strongylocentrotus purpuratus]	gi|390349564|ref|XP_003727239.1|#PREDICTED: tubulin beta chain isoform X2 [Strongylocentrotus purpuratus]	13#GO:0051258#protein polymerization#biological_process,GO:0005737#cytoplasm#cellular_component,GO:0043234#protein complex#cellular_component,GO:0003924#GTPase activity#molecular_function,GO:0008152#metabolic process#biological_process,GO:0005874#microtubule#cellular_component,GO:0007017#microtubule-based process#biological_process,GO:0006184#obsolete GTP catabolic process#biological_process,GO:0…	2#Pfam#PF03953#Tubulin C-terminal domain,Pfam#PF00091#Tubulin/FtsZ family, GTPase domain,	566.45,407.58,14.29,634.78,569.53,823.66,19.55,15.63,20.17,386.48,538.43,642.44	386.582	294.279	0.611214	0.0713524	-1.2651	0.843409	0.621681	1.48525	-1.24723	-1.26055	-1.24512	-0.000348309	0.515999	0.869439	Tublin, Tublin_C	MFPPFPPPRNAGSAPLSGGTIPPPPNQLTLPQVDSPGSFIMREIVHIQAGQCGNQIGAKFWEVISDEHGIDPTGTYVGDSELQLERISVYYNRATGGKYVPRAVLVDLEPGTMDSVRSGPFGQIFRPDNFVFGQSGAGNNWAKGHYTEGAELVDTVLDVVRKEAESCDCLQGFQLTHSLGGGTGSGMGTLLISKIREEYPDRIMNTFSVVPSPKVSDTVVEPYNATLSVHQLVENTDETYCIDNEALYDICFRTLKLTTPTYGDLNHLVSATMSGVTTCLRFPGQLNADLRKLAVNMVPFPRLHFFMPGFAPLTSRGSQQYRALTVSELTQQMFDAKNMMAACDPRHGRYLTVAAVFRGIMSMKDVDEQMLNVQNKNSSYFVEWIPNNVKTAVCDIPPR…
cots4c	R	oki.16.50	86.61	8	3	3		50193	oki.16.50	tubulin beta chain isoform X1 [Ciona intestinalis]	gi|390349564|ref|XP_003727239.1|#PREDICTED: tubulin beta chain isoform X2 [Strongylocentrotus purpuratus]	20#GO:0035725#sodium ion transmembrane transport#biological_process,GO:0005737#cytoplasm#cellular_component,GO:0016324#apical plasma membrane#cellular_component,GO:0005874#microtubule#cellular_component,GO:0005198#structural molecule activity#molecular_function,GO:0035435#phosphate ion transmembrane transport#biological_process,GO:0005200#structural constituent of cytoskeleton#molecular_function,…	2#Pfam#PF03953#Tubulin C-terminal domain,Pfam#PF00091#Tubulin/FtsZ family, GTPase domain,	540.35,383.89,16102.48,613.75,501.44,779.14,291.47,253.65,66.46,814.88,283.23,275.41	1742.18	4527.85	-0.26543	-0.299985	3.17155	-0.249219	-0.274024	-0.212692	-0.320397	-0.328749	-0.370091	-0.204799	-0.322217	-0.323944	Tublin, Tublin_C	MREIVHIQAGQCGNQIGAKFWEVISDEHGIDPTGTYHGDSDLQLERINVYYNEATGGKYVPRAVLVDLEPGTMDSVRSGPFGQIFRPDNFVFGQSGAGNNWAKGHYTEGAELVDSVLDVVRKEAESCDCLQGFQLTHSLGGGTGSGMGTLLISKIREEYPDRIMNTFSVVPSPKVSDTVVEPYNATLSVHQLVENTDETYCIDNEALYDICFRTLKLTTPTYGDLNHLVSATMSGVTTCLRFPGQLNADLRKLAVNMVPFPRLHFFMPGFAPLTSRGSQQYRALTVPELTQQMFDAKNMMAACDPRHGRYLTVAAMFRGRMSMKEVDEQMLNVQNKNSSYFVEWIPNNVKTAVCDIPPRGLKMSVTFIGNSTAIQELFKRISEQFTAMFRRKAFLHWYT…
cots4c	R	oki.98.10	85.67	25	3	3	Carbamidomethylation	12144	gbr.272.7	Uncharacterised protein							1.54222	-0.489752	-0.682513	1.7888	1.78788	1.78885	-0.496999	-0.939479	-0.402103	-0.447214	-0.575576	-0.932068	PreSET, FYVE, PKS_PP_betabranch	EPNLEVVPSKEEQLMQLYSEDLAEMTPQEIAKFLLVDFNSVSASDVMGEGISGSCTTSKQDLSAECCTTLSLEPFLDETAKACASVKVLKKAYGLHIKITAFGSTVYNKEIS
cots4c	R	*No corresponding oki*	86.61	6	3	3		66185	gbr.10.43	tubulin, beta, 2-like [Saccoglossus kowalevskii]
cots4c	R	oki.83.49	49.21	0	2	2		541013	gbr.504.1	deleted in malignant brain tumors 1 protein [Gallus gallus]	gi|780114328|ref|XP_011676986.1|#PREDICTED: uncharacterized protein LOC583353 [Strongylocentrotus purpuratus]	25#GO:0043627#response to estrogen#biological_process,GO:0005515#protein binding#molecular_function,GO:0019048#modulation by virus of host morphology or physiology#biological_process,GO:0005576#extracellular region#cellular_component,GO:0030858#positive regulation of epithelial cell differentiation#biological_process,GO:0005578#proteinaceous extracellular matrix#cellular_component,GO:0007155#cell…	3#Pfam#PF00530#Scavenger receptor cysteine-rich domain,Pfam#PF00008#EGF-like domain,Pfam#PF00754#F5/8 type C domain,	0.49,5.81,7.47,2.36,2.72,6.26,1.07,3.03,9.65,10.62,4.20,4.30	4.83167	3.22174	-1.34762	0.303667	0.818917	-0.767185	-0.655444	0.443343	-1.16759	-0.559222	1.49557	1.79665	-0.196064	-0.165025
cots4c	R	oki.1.63	37.94	4	2	2		37267	gbr.2.190	Zinc metalloproteinase nas-14-like [Saccoglossus kowalevskii]	gi|390361823|ref|XP_780283.3|#PREDICTED: uncharacterized protein LOC574792 [Strongylocentrotus purpuratus]	6#GO:0005615#extracellular space#cellular_component,GO:0007155#cell adhesion#biological_process,GO:0010185#regulation of cellular defense response#biological_process,GO:0042806#fucose binding#molecular_function,GO:0001868#"regulation of complement activation, lectin pathway"#biological_process,GO:0005509#calcium ion binding#molecular_function,	1#Pfam#PF00754#F5/8 type C domain,	17.16,19.47,2.11,313.91,340.03,393.39,1.26,2.75,24.71,138.38,3.10,8.73	105.417	152.583	-0.578419	-0.563279	-0.677054	1.36643	1.53761	1.88733	-0.682625	-0.672859	-0.528937	0.216036	-0.670566	-0.633668	Signal, FTP	MLRSLAAVVLVLGLVGFQMTTAWNGDKLDLLERVLKEEVEESKKSGDSTNLPIVGKITWQSSTLGAYSSNKAVDGSSSSNLYPSQHCSHTITAARDPWWMVDLGSNHCISKVRILNRGDCCSERLEGAVVRVGPSVTGTENWACGSPVTAAQAAPSGGTIEFTCYPALKGRYVSVDIPGSATLQLCEVTLEEIPLSQCPVPQPFNVVGKTAEQSTTHGAGYTADLAVDGSSSAILYPARHCSHTVTNSNHPWWKVDLGGEQCVTKVTILNRGDCCSDRLQNAIVRAGTSETATANQACGAPITASQAQPLGGTIEIKCDRPLRARYVSVDIPGTATLQLCEVSVEVLSSPDC*
cots4c	R	oki.1.63	37.94	4	2	2		33782	oki.1.63	Zinc metalloproteinase nas-14-like [Saccoglossus kowalevskii]	gi|390361823|ref|XP_780283.3|#PREDICTED: uncharacterized protein LOC574792 [Strongylocentrotus purpuratus]	6#GO:0005615#extracellular space#cellular_component,GO:0007155#cell adhesion#biological_process,GO:0010185#regulation of cellular defense response#biological_process,GO:0042806#fucose binding#molecular_function,GO:0001868#"regulation of complement activation, lectin pathway"#biological_process,GO:0005509#calcium ion binding#molecular_function,	1#Pfam#PF00754#F5/8 type C domain,	17.16,19.47,2.11,313.91,340.03,393.39,1.26,2.75,24.71,138.38,3.10,8.73	105.417	152.583	-0.578419	-0.563279	-0.677054	1.36643	1.53761	1.88733	-0.682625	-0.672859	-0.528937	0.216036	-0.670566	-0.633668	Signal, FTP	MLRSLAAVVLVLGLVGFQMTTAWNGDKLDLLERVLKEEVEESKKSGDSTNLPIVGKITWQSSTLGAYSSDKAVDGSSSSNLYPSQHCSHTITAARDPWWMVDLGSNHCISKVRILNRGDCCSERLEGAVVRVGPSVTGTENWACGSPVTAAQAAPSGGTIEFTCYPALKGRYVSVDIPGSATLQLCEVTLEEIPLSQCPVPQPFNVVGKTAEQSTTHGAGYTADLAVDGSSSAILYPARHCSHTGDRLQNAIVRAGTSETATANQACGAPITASQAQPLGGTIEIKCDRPLRARYVSVDIPGTATLQLCEVSVEVLSSPDC*
cots4c	R	oki.85.28	67.61	16	2	2	Carbamidomethylation	14816	gbr.207.8	Uncharacterised protein							0.479478	-0.745092	1.52692	-0.457895	-0.48409	-0.444061	1.7817	0.879503	0.0513413	-0.447214	1.70879	1.45376	Nothing	MLLRSPTPSINVVDVPESLDRTLRPDWKGGEWDTVEYTANPYTLQLTQLEGDDEWRLNFAQEDASESFRLCTATDYRGRELGTEQHLSVCLENFSTGYVAPAGCTKPVALVTLADRFSNLRMSGQQVMYCAS*
cots4c	R	*No corresponding oki*	80.06	6	2	2	Carbamidomethylation	52224	gbr.60.102	Ependymin
cots4c	R	*No corresponding oki*	80.06	13	2	2	Carbamidomethylation	25010	gbr.60.102b	Ependymin
cots4c	R	oki.23.43	33.14	4	1	1		33187	gbr.370.21	Uncharacterized protein LOC110975837 [Acanthaster planci]	No seaurchin mapping	No GO mapping	No Pfam mapping	1.96,13843.77,6.01,0,1.56,4.31,0.72,0.48,25.38,0,10.17,4.90	1158.27	3994.9	-0.289447	3.17542	-0.288433	-0.289937	-0.289547	-0.288859	-0.289757	-0.289817	-0.283584	-0.289937	-0.287392	-0.288711
cots4c	R	oki.23.43	33.14	4	1	1		31564	oki.23.43	Uncharacterized protein LOC110975837 [Acanthaster planci]	No seaurchin mapping	No GO mapping	No Pfam mapping	1.96,13843.77,6.01,0,1.56,4.31,0.72,0.48,25.38,0,10.17,4.90	1158.27	3994.9	-0.289447	3.17542	-0.288433	-0.289937	-0.289547	-0.288859	-0.289757	-0.289817	-0.283584	-0.289937	-0.287392	-0.288711
cots4c	R	oki.208.17	54.96	6	1	1		20642	gbr.334.16	cysteine-rich secretory protein	gi|780186950|ref|XP_011662824.1|#PREDICTED: peptidase inhibitor 15, partial [Strongylocentrotus purpuratus]	3#GO:0030414#peptidase inhibitor activity#molecular_function,GO:0016021#integral component of membrane#cellular_component,GO:0005576#extracellular region#cellular_component,	1#Pfam#PF00188#Cysteine-rich secretory protein family,	3.04,877,1.87,0.84,0,2.68,0,3.38,17.66,0,2.90,3.71	76.09	252.266	-0.289575	3.17486	-0.294213	-0.298296	-0.301626	-0.291002	-0.301626	-0.288228	-0.231621	-0.301626	-0.29013	-0.286919	Signal, SCP domain	MLRFGDVFFLLGLYLFWGAGVNAQVDADGTYTAVSLTPEEKDVFLNAHNELRSNVDPEAANMMFMNWDKSLALMAQAWSAKCIWDHGQPTPNISPFTSLGQNMYLIIGHGNRPSGRAVSTFWYNENRHYTFETDACSGVTCDHYTQLVWAKSRSLGCGMAFCKSVSNTKWRDVWIVTCNYGPR*
cots4c	R	oki.208.17	54.96	5	1	1		23908	oki.208.17	cysteine-rich secretory protein	gi|780186950|ref|XP_011662824.1|#PREDICTED: peptidase inhibitor 15, partial [Strongylocentrotus purpuratus]	3#GO:0030414#peptidase inhibitor activity#molecular_function,GO:0016021#integral component of membrane#cellular_component,GO:0005576#extracellular region#cellular_component,	1#Pfam#PF00188#Cysteine-rich secretory protein family,	3.04,877,1.87,0.84,0,2.68,0,3.38,17.66,0,2.90,3.71	76.09	252.266	-0.289575	3.17486	-0.294213	-0.298296	-0.301626	-0.291002	-0.301626	-0.288228	-0.231621	-0.301626	-0.29013	-0.286919	Signal, SCP domain	MLRFGDVFFLLGLYLFWGAGVNARVDADGTYTAVSLTPEEKDVFLNAHNELRSNVDPEAANMMFMNWDKSLALMAQAWSAKCIWDHGQPTPNISPFTSLGQNMYLITGYGNRPSGRAVSTFWYNENRHYTFETDACSGVTCDHYTQLVWAKSRSLGCGMAFCKSVSNTKWRDVWIVTCNYGPRCPRFSPLRPAYRSSIRTTASAPPIPERTL*
cots4c	R	oki.267.11	45.65	2	1	1		62245	gbr.102.53	sodium-dependent noradrenaline transporter isoform X1 [Orcinus orca]	gi|780135498|ref|XP_011679914.1|#PREDICTED: sodium-dependent noradrenaline transporter-like, partial [Strongylocentrotus purpuratus]	9#GO:0005328#neurotransmitter:sodium symporter activity#molecular_function,GO:0006836#neurotransmitter transport#biological_process,GO:0007268#synaptic transmission#biological_process,GO:0044765#single-organism transport#biological_process,GO:0022891#substrate-specific transmembrane transporter activity#molecular_function,GO:0016021#integral component of membrane#cellular_component,GO:0005887#int…	1#Pfam#PF00209#Sodium:neurotransmitter symporter family,	26.59,89.6,0.33,4.77,5.41,8.84,6.77,2.67,10.62,18.88,6.15,8.10	15.7275	24.3513	0.446075	3.03362	-0.632307	-0.449976	-0.423694	-0.282839	-0.367845	-0.536214	-0.209742	0.129459	-0.393305	-0.313228	PSN, UreE_C, UDG, TLC, Proteasome_A_N	MHLSQGLHDLVGLKWDLVLCLLAVMVVLFFSLWKGVKSSGKVSFPDESIAGHWKWVVNPSEKVVWVTATLPYIVLLVLLIHGCTLPGSGKGILYYLTPDFGRLLEAQVWIDAAVQIFFSTGAGFGVHLAYASYNKFHNNIYKDVLFTSAVNSVTSFFAGFVVFAVLGYMSETTGKDIKDVATEGPGLVFVVYPEAIATMDGSVFWSIIFYLMLITLGLDSSFGGLEAVISGLTDRFPKYFKNHRKLLTLGVVVSVFFCALLNVTYGGIYMFVLQERFAAGASLLFVVMLEAIIISWLYGVDNFIDNIKEMLGFKPGIWWRLCWKIFAPIFLTLVFFVSLALSEPLTYDDYVYPPWGQAFGWLLAISSMIFVPIFAVVNVFKAEGDGFKTKLAFLITPKN…
cots4c	R	oki.267.11	45.65	1	1	1		95525	oki.267.11	sodium-dependent noradrenaline transporter isoform X1 [Orcinus orca]	gi|780135498|ref|XP_011679914.1|#PREDICTED: sodium-dependent noradrenaline transporter-like, partial [Strongylocentrotus purpuratus]	9#GO:0005328#neurotransmitter:sodium symporter activity#molecular_function,GO:0006836#neurotransmitter transport#biological_process,GO:0007268#synaptic transmission#biological_process,GO:0044765#single-organism transport#biological_process,GO:0022891#substrate-specific transmembrane transporter activity#molecular_function,GO:0016021#integral component of membrane#cellular_component,GO:0005887#int…	1#Pfam#PF00209#Sodium:neurotransmitter symporter family,	26.59,89.6,0.33,4.77,5.41,8.84,6.77,2.67,10.62,18.88,6.15,8.10	15.7275	24.3513	0.446075	3.03362	-0.632307	-0.449976	-0.423694	-0.282839	-0.367845	-0.536214	-0.209742	0.129459	-0.393305	-0.313228	CBD_IV, 7TM_GPCR_Srsx, Brr6_like_C_C, FN1, PSN	MNMSAGKSLKPEGQTLGCSDANSDKDTAPDRLVEPRTGARSGPARHAHSTRRQSAGAPEDDEAGLVNLGADKAANGGHAGSSREPATALNAEHPGSALKAADGASTATMEMKVKASQHDIMLEPDGDELGVIDDGGTGDDRETWGGKIDFLLSVIGFAVDLANVWRFPYLAYRNGGGAFLIPYVIFLIFGGLPMLYMELALGQYFRQGAINVWSICPLSQGLGWAVVLIAWYVAFYYNVIIAWSIYYLFASFTSVLPWSDCSNEWNTQLCFDGSFNESWVRVGDEAFLVNSSTGNSPAKEYYERRVLEMHLSQGLHDLVGLKWDLVLCLLAVMVVLFFSLWKGVKSSGKVSFPDESVAGHWKWVVNPSEKVVWVTATLPYIVLLVLLIHGCTLPGSGKG…
cots4c	R	oki.15.269	26.97	2	1	1		48577	oki.15.269	Tubulin alpha-3 chain, partial [Anas platyrhynchos]	gi|780036755|ref|XP_011667512.1|#PREDICTED: tubulin alpha-1 chain isoform X5 [Strongylocentrotus purpuratus]	12#GO:0051258#protein polymerization#biological_process,GO:0005737#cytoplasm#cellular_component,GO:0043234#protein complex#cellular_component,GO:0003924#GTPase activity#molecular_function,GO:0008152#metabolic process#biological_process,GO:0005874#microtubule#cellular_component,GO:0007017#microtubule-based process#biological_process,GO:0006184#obsolete GTP catabolic process#biological_process,GO:0…	2#Pfam#PF03953#Tubulin C-terminal domain,Pfam#PF00091#Tubulin/FtsZ family, GTPase domain,	130.96,567.69,94.96,13.14,12.02,4.96,0.45,0,2.14,0,35.26,115.89	81.4558	160.635	0.308178	3.02695	0.0840674	-0.425286	-0.432259	-0.476209	-0.504285	-0.507087	-0.493764	-0.507087	-0.287583	0.214363	Tublin, Tublin_C	MGNACWELYCLEHGIQPDGQMPSDTSIGSCEDSFNTFFSETSSGKHVPRAIFVDLEPTVVDEVRTGTYRQLFHPEQLITGKEDAANNYARGHFSVGREKVDEVIDKIRKMADKCTGLQGFLIFHSFGGGTGSGFSALLMEKLAVDFGKKSKLEVAVYPAPQMSSSVVEPYNSVLATHTTLEHTDCAFVVDNEAIYDICRRKLDIERPSYANLNRLIAQVVSSITSSLRFEGSLNVDLNEFQTNLVPYPRIHFPLVTYAPVISAEKAYHEQFSIADLTGACYEPENQMVKCDPRHGKYMACCLLYRGDVVPKDVNAAIANIKTKRTIQFVDWCPTGFKVGINNQPPTVVPGGDLAKVQRAVCMLSNTTAIAEAWARLDHKFDLMYAKRAFVHWYVGEGME…
cots4c	R	oki.42.47	17.96	1	1	1		126006	oki.42.47	protein FAM214A-like [Strongylocentrotus purpuratus]	gi|780025788|ref|XP_011665961.1|#PREDICTED: protein FAM214A [Strongylocentrotus purpuratus]	No GO mapping	2#Pfam#PF13889#Chromosome segregation during meiosis,Pfam#PF13915#Domain of unknown function (DUF4210),	10.46,12.16,24.69,8.29,6.09,12.93,26.57,18.68,3.97,2.33,15.98,11.89	12.8367	7.59988	-0.312724	-0.0890365	1.55967	-0.598255	-0.887733	0.0122809	1.80705	0.768872	-1.16669	-1.38248	0.413603	-0.124563	DUF4210	MQTIEYHQQPQTMIAGAGLVTPSGVGLMGQVPDDLEVDDDPRPEPNDLFVDFGMLILEGRKPERSVKGRVEGEHCPPRYPNEIRHRCAPDRVARVFEYHQQPQTMIAGAGLVTPSGVGLMGQVPDDLEVDDDPRPEPNDLFVDFGMLILEGRKPERSVKGRVEGEHCPPRYPNEIRHRCAPDRVARCKQIEAARSYICFLCLNNIPMSIEVLLYPDCCREGEQAGIEMTSTSEETAQTPDQPSPHLLLEQWIIQLLPKRFPDGHSHSHLLFQAVRSFLHFSQISAWLSSTQGRLPKNIVYRVCAPGESFPTSFSSTPEVHTFPILNLSKSSSLRVTVASLPRSQSIPALPCYNAAHSAMGRAARKGGSDRDAEDDDREFSYSFVDPSRERDQRSGEELK…
cots4c	R	oki.36.13	28.23	1	1	1		214301	gbr.35.36	vitellogenin 2 [Patiriella regularis]	gi|115916235|ref|XP_788611.2|#PREDICTED: uncharacterized protein C1orf228 homolog [Strongylocentrotus purpuratus]	3#GO:0005319#lipid transporter activity#molecular_function,GO:0005488#binding#molecular_function,GO:0006869#lipid transport#biological_process,	3#Pfam#PF09172#Domain of unknown function (DUF1943),Pfam#PF00094#von Willebrand factor type D domain,Pfam#PF01347#Lipoprotein amino terminal region,	265.45,80.08,39.58,138.77,143.81,504.22,7.68,13.04,131.01,1486,253.72,377.08	286.703	406.581	-0.0522734	-0.508198	-0.607809	-0.363848	-0.351451	0.53499	-0.686268	-0.673085	-0.382934	2.94971	-0.0811237	0.222285
cots4c	R	oki.36.13	28.23	0	1	1		247100	oki.36.13	vitellogenin 2 [Patiriella regularis]	gi|115916235|ref|XP_788611.2|#PREDICTED: uncharacterized protein C1orf228 homolog [Strongylocentrotus purpuratus]	3#GO:0005319#lipid transporter activity#molecular_function,GO:0005488#binding#molecular_function,GO:0006869#lipid transport#biological_process,	3#Pfam#PF09172#Domain of unknown function (DUF1943),Pfam#PF00094#von Willebrand factor type D domain,Pfam#PF01347#Lipoprotein amino terminal region,	265.45,80.08,39.58,138.77,143.81,504.22,7.68,13.04,131.01,1486,253.72,377.08	286.703	406.581	-0.0522734	-0.508198	-0.607809	-0.363848	-0.351451	0.53499	-0.686268	-0.673085	-0.382934	2.94971	-0.0811237	0.222285
cots4c	R	oki.36.14	28.23	1	1	1		98345	gbr.35.38	vitellogenin 2 [Patiriella regularis]	gi|780119307|ref|XP_011677674.1|#PREDICTED: uncharacterized protein LOC583660 [Strongylocentrotus purpuratus]	4#GO:0045735#nutrient reservoir activity#molecular_function,GO:0005319#lipid transporter activity#molecular_function,GO:0005576#extracellular region#cellular_component,GO:0006869#lipid transport#biological_process,	3#Pfam#PF09172#Domain of unknown function (DUF1943),Pfam#PF00094#von Willebrand factor type D domain,Pfam#PF01347#Lipoprotein amino terminal region,	3.81,2.35,8.55,4.3,5.02,21.24,1.02,7.13,23.7,10.9,5.67,15.32	9.08417	7.36659	-0.715958	-0.91415	-0.0725121	-0.649441	-0.551703	1.65013	-1.0947	-0.265274	1.98407	0.246496	-0.463467	0.846502
cots4c	R	oki.36.14	28.23	1	1	1		201968	oki.36.14	vitellogenin 2 [Patiriella regularis]	gi|780119307|ref|XP_011677674.1|#PREDICTED: uncharacterized protein LOC583660 [Strongylocentrotus purpuratus]	4#GO:0045735#nutrient reservoir activity#molecular_function,GO:0005319#lipid transporter activity#molecular_function,GO:0005576#extracellular region#cellular_component,GO:0006869#lipid transport#biological_process,	3#Pfam#PF09172#Domain of unknown function (DUF1943),Pfam#PF00094#von Willebrand factor type D domain,Pfam#PF01347#Lipoprotein amino terminal region,	3.81,2.35,8.55,4.3,5.02,21.24,1.02,7.13,23.7,10.9,5.67,15.32	9.08417	7.36659	-0.715958	-0.91415	-0.0725121	-0.649441	-0.551703	1.65013	-1.0947	-0.265274	1.98407	0.246496	-0.463467	0.846502	Signal, LPD_N, DUF1943, VWD	MRQLLLLLVGVAFARAAVVPSQERYFAAGREYVYHYEGQVVSGIPGVSKEVAGIKITTDVRIQMMADNKCLLRFEQVQLAKIQTETEDPAKQLTVDKLQRLQQEIETPLLEQLVKPIEFRYFNGKVFHIVISQNEPVWASNIKKGVLELMLVNIQGTDDLNEPETQRTQPSNILHQKEHYRVMERGIAGYCESVYNVKISDLVPDIIDKEVQPKRFVLNITKTRDLLECQQRTQRSKLSLLSSRRCEKCKGQETSPAPEPFSEFRKPNEKKEELLKCLSQVRYSISLKDHNKFVIDAVVAEGKHIFQPFGQKGGKAVAFVNQTFILKSTREIQDEFIPDVENPKDQAEDLTFVFEAWKKHEHDSEEERELTEEDGTHMRQIRTKVKTYLQKIQDNIKKD…
cots4s	S	oki.8.264	140.4	36	7	3	Carbamidomethylation; Deamidation (NQ); Dehydration	17667	gbr.558.1	Phospholipase A2 AP-PLA2-II; [Acanthaster planci]	gi|780176033|ref|XP_003724325.2|#PREDICTED: phospholipase A2-like [Strongylocentrotus purpuratus]	8#GO:0016042#lipid catabolic process#biological_process,GO:0005576#extracellular region#cellular_component,GO:0006644#phospholipid metabolic process#biological_process,GO:0019835#cytolysis#biological_process,GO:0009395#phospholipid catabolic process#biological_process,GO:0004623#phospholipase A2 activity#molecular_function,GO:0005509#calcium ion binding#molecular_function,GO:0044179#hemolysis in …	1#Pfam#PF00068#Phospholipase A2,	0,2189.5,3.11,1.39,0,4.44,0,0,0,0,3.36,0.00	183.483	631.733	-0.290444	3.17542	-0.285521	-0.288244	-0.290444	-0.283416	-0.290444	-0.290444	-0.290444	-0.290444	-0.285126	-0.290444
cots4s	S	oki.8.261	98.89	21	5	1	Carbamidomethylation	17494	oki.8.261	Phospholipase A2 AP-PLA2-II; [Acanthaster planci]	gi|390366767|ref|XP_782766.2|#PREDICTED: phospholipase A2 AP-PLA2-II [Strongylocentrotus purpuratus]	8#GO:0016042#lipid catabolic process#biological_process,GO:0005576#extracellular region#cellular_component,GO:0006644#phospholipid metabolic process#biological_process,GO:0019835#cytolysis#biological_process,GO:0009395#phospholipid catabolic process#biological_process,GO:0004623#phospholipase A2 activity#molecular_function,GO:0005509#calcium ion binding#molecular_function,GO:0044179#hemolysis in …	1#Pfam#PF00068#Phospholipase A2,	0,1150.05,0,1.33,7.69,2.13,0,0,11.79,0,1.39,1.16	97.9617	331.342	-0.295651	3.17523	-0.295651	-0.291637	-0.272442	-0.289223	-0.295651	-0.295651	-0.260068	-0.295651	-0.291456	-0.29215	Signal, PA2c	MKTFLILAMAVALAKAQSTDEITNLVQFGNLVMCLGNIGYTEGLEYDGYGCFCGKGGKGTPVDATDRCCEVHDNCYGQAVEEGKCWSVETYGTTYWYDQSTSSGSCSIRCWEEGDYNSLVPSKACKAAICECDRKAAQCFADNRPTFNRKYLNYAKDTC*
cots4s	S	oki.185.68	101.09	3	5	2		184077	oki.185.68	vitellogenin [Parvulastra exigua]	gi|780119307|ref|XP_011677674.1|#PREDICTED: uncharacterized protein LOC583660 [Strongylocentrotus purpuratus]	3#GO:0045735#nutrient reservoir activity#molecular_function,GO:0005319#lipid transporter activity#molecular_function,GO:0006869#lipid transport#biological_process,	3#Pfam#PF09172#Domain of unknown function (DUF1943),Pfam#PF00094#von Willebrand factor type D domain,Pfam#PF01347#Lipoprotein amino terminal region,	22.11,34.8,47.76,20.61,181.68,179.02,8.01,4.72,184.52,3834.13,33.51,79.06	385.827	1088.17	-0.334248	-0.322586	-0.310676	-0.335627	-0.187607	-0.190051	-0.347206	-0.350229	-0.184997	3.16891	-0.323772	-0.281912
cots4s	S	oki.185.68	94.13	3	4	1		133746	gbr.198.25	vitellogenin [Parvulastra exigua]	gi|780119307|ref|XP_011677674.1|#PREDICTED: uncharacterized protein LOC583660 [Strongylocentrotus purpuratus]	3#GO:0045735#nutrient reservoir activity#molecular_function,GO:0005319#lipid transporter activity#molecular_function,GO:0006869#lipid transport#biological_process,	3#Pfam#PF09172#Domain of unknown function (DUF1943),Pfam#PF00094#von Willebrand factor type D domain,Pfam#PF01347#Lipoprotein amino terminal region,	22.11,34.8,47.76,20.61,181.68,179.02,8.01,4.72,184.52,3834.13,33.51,79.06	385.827	1088.17	-0.334248	-0.322586	-0.310676	-0.335627	-0.187607	-0.190051	-0.347206	-0.350229	-0.184997	3.16891	-0.323772	-0.281912
cots4s	S	oki.27.35	118.37	4	3	3	Methyl ester; Sulfation	93897	gbr.147.31	Phospholipase A2 AP-PLA2-II; [Acanthaster planci]	gi|780067770|ref|XP_003725560.2|#PREDICTED: plancitoxin-1 isoform X2 [Strongylocentrotus purpuratus]	6#GO:0005576#extracellular region#cellular_component,GO:0000737#"DNA catabolic process, endonucleolytic"#biological_process,GO:0006259#DNA metabolic process#biological_process,GO:0004531#deoxyribonuclease II activity#molecular_function,GO:0090305#nucleic acid phosphodiester bond hydrolysis#biological_process,GO:0006915#apoptotic process#biological_process,	1#Pfam#PF03265#Deoxyribonuclease II,	16.15,48.42,0.62,6.29,7.92,7.69,0.12,0.29,4.54,0,16.66,15.74	10.37	13.5603	0.426244	2.80598	-0.71901	-0.300878	-0.180674	-0.197636	-0.755883	-0.743346	-0.429931	-0.764732	0.463854	0.396009	Signal	MPSSVIMFTFLALTVLTAVMVGTSEAVSCMDNKNKPVDWFIVYKLPQDSASSKPVIREGYGQMYMDVNNQALKFSSTSLKDDDHAIAYTVDDIYKNHGKGNLAHVMYNDQPPAGEEIQSGLVGHTKGVLAFDGTSGFWLVHSVPKFPLPASKSYNWPDNAKRNGQTLLCITFKYDQFEKIGQQLKYNYPGVYDSDLPSKLVGKTPSIVDLVKNVHVTSPPWNRQLNLQSKSGQTFVSFNKASKWGEDLYKNWLATHFKSGLYCETWQNGGRNLNSSCEAGLNVYNVKKVSLSGGSDFKGTKDHSKWAVTTKSGLKWTCIGGINRQTSQMYRGGGAVCLENANVHKAFYDSVAEYEPCT
cots4s	S	oki.27.35	118.37	3	3	3	Methyl ester; Sulfation	150661	oki.27.35	Phospholipase A2 AP-PLA2-II; [Acanthaster planci]	gi|780067770|ref|XP_003725560.2|#PREDICTED: plancitoxin-1 isoform X2 [Strongylocentrotus purpuratus]	6#GO:0005576#extracellular region#cellular_component,GO:0000737#"DNA catabolic process, endonucleolytic"#biological_process,GO:0006259#DNA metabolic process#biological_process,GO:0004531#deoxyribonuclease II activity#molecular_function,GO:0090305#nucleic acid phosphodiester bond hydrolysis#biological_process,GO:0006915#apoptotic process#biological_process,	1#Pfam#PF03265#Deoxyribonuclease II,	16.15,48.42,0.62,6.29,7.92,7.69,0.12,0.29,4.54,0,16.66,15.74	10.37	13.5603	0.426244	2.80598	-0.71901	-0.300878	-0.180674	-0.197636	-0.755883	-0.743346	-0.429931	-0.764732	0.463854	0.396009	Signal, CNH, TGc, IGc2, RICIN, TBOX, btg1, GYF, CBM_10, Fapy_DNA_glyco, CBD_II, Aamy_C, ACTIN, RAB, CPW_WPC, Dynein_light, ZnF_TTF, JmjC, CXC, ARF, Dabb, DM15	MPCCVMTFTFLVLTAIMVGTSEAAVTCKGANGYPVDWFIVYKLPQDSSSSVQVIKDGYGQMYMDVNNPVLTLSSASLKDTNHAIAYTLEEIYRNQENDDLAHVMYNDQPPPSKEIQTGLNGHTKGVLAFDDDTGYWLVHSVPKFAPPASKEYKWPDSARRNGQTLLCITFNYNQFEKIGQQLKYNHPLVYNYDLPPDLAKDNPSIKDVINGVHVTVAPWNRALTLQSKDGQTFVSFNKAGKFSADLYKDWLAPYFKSGLYCETWQNGRARKLNSSCVGGIDVYNVREVSLRGGSDFKGTKDHSKWAVTTKPGLKWTCIGGINRVVLIYREFGCTLMIAVPHFPYPAPALALYSLVRTAKALIYSGYIPFPSRLRNVACPRWTAMEVILGRKIFQRHLRV…
cots4s	S	oki.111.24	84.25	12	3	3	Carbamidomethylation	27145	gbr.283.2	Uncharacterised protein							-0.743695	0.522674	0.520617	-0.451039	-0.440512	-0.445068	-0.290706	-0.193735	-0.0254602	-0.447214	0.0522292	-0.954838
cots4s	S	oki.8.262	26.73	4	1	1		22517	oki.8.262	Phospholipase A2 AP-PLA2-II; [Acanthaster planci]	gi|780176033|ref|XP_003724325.2|#PREDICTED: phospholipase A2-like [Strongylocentrotus purpuratus]	8#GO:0016042#lipid catabolic process#biological_process,GO:0005576#extracellular region#cellular_component,GO:0006644#phospholipid metabolic process#biological_process,GO:0019835#cytolysis#biological_process,GO:0009395#phospholipid catabolic process#biological_process,GO:0004623#phospholipase A2 activity#molecular_function,GO:0005509#calcium ion binding#molecular_function,GO:0044179#hemolysis in …	1#Pfam#PF00068#Phospholipase A2,	0,2605.06,0,1.82,2.06,4.38,0,0.41,2.18,94.91,2.47,1.32	226.218	749.624	-0.301775	3.17338	-0.301775	-0.299347	-0.299027	-0.295932	-0.301775	-0.301228	-0.298867	-0.175165	-0.29848	-0.300014

## Sheet: Total spine minus replicates
Accession	BLAST best Hit	Domains	Amin acid sequence	Prediction	SP(Sec/SPI)
oki.208.17	Cysteine-rich secretory protein [Strongylocentrotus purpuratus]	Signal, SCP domain	MLRFGDVFFLLGLYLFWGAGVNAQVDADGTYTAVSLTPEEKDVFLNAHNELRSNVDPEAANMMFMNWDKSLALMAQAWSAKCIWDHGQPTPNISPFTSLGQNMYLIIGHGNRPSGRAVSTFWYNENRHYTFETDACSGVTCDHYTQLVWAKSRSLGCGMAFCKSVSNTKWRDVWIVTCNYGPR*	SP(Sec/SPI)	0.99432
oki.83.49	Deleted in malignant brain tumors 1 protein [Gallus gallus]	Signal, FTP, EGF, SR domain	MKILAIFLLISPVVLGGQVLPPELSLIGKTVTQSTILASYAPSAAIDGTISTFSHTVVGDPHPWWQVDLGEDYCVRTITVILRQGCCAIPLDGKTATQSSTHEPFDAGVAIDGNVYTFSHTLADDSHPWWQVDLGDEYCVGKITVVLRHGCCGQGRFTAAVARAGLSTDYAENEPCGSLATRAQSYDGATVEFVCDVPRRARYVSLDIDPSSPDVTKAILQLGEVKVEENIEQGCPSFCPLQILRMSATQSSTYNSDDTYSADKAIDGQIETFAHTDDNTDSHPTWQVDLGREVNVGRITVMLRQGCCDQNRFMAAVARAGLNADYAQNQPCGSMATEEQAATGATIVFVCPVPRRARYVSLDIDPANSEAVIKLLQLAEVIVEEATYSECPTICPIPL…	SP(Sec/SPI)	0.995284
oki.141.73	Ependymin	Signal	MDIKSAVLLLLVGLATSYAQPAEGPCCFPDQFEVGYGSETAVGGRGGTKRLALVGQAAIDVTKNMIGNEFMLFQSDEERPSRQRLVQDYEQV*	SP(Sec/SPI)	0.999347
oki.11.66	Ependymin	Signal	MYAAVILCILVVAASASPEKFIFGNKLDQPAPEKCCAEPYYTFQADSVFNTLQEGSLLTELIRARGAYDSIDKKFGLKVDLHISNGTVELYQLINDFKEGLGYYIYTEEEETKCVEFPITSGFPYNCIPEGSTYVGSVTIGDRALRAANWYFNDKTDPTKDMHIVFSIKEEECIDLGYLARTFDPETGTEISVDRTGISDYNLGICDPDTYFKPPEECKSAKVKRVNSVPKRIGGLRGPHESKFINLVTIGERALKAGNWYMLYTDDPDQDVYVVYSFKNPEYVDLGYFSRAMDKRYQVPSCGRTRTAAPTTAWASATQKVTTTTSVQDGSLLVEYDNAEGAYDAKFERIAVKLVIDYFNGTEVYLRLIEDYIKGVSYYILEHAGEDICFVGRTEGRFN…	SP(Sec/SPI)	0.997808
oki.258.16	Kielin/chordin-like protein [Asterias rubens]	Signal, EGF, VWC_def, TY	MRIFLLLAFVAVVRGASLPWSVVPWEEWDVDLGITGPEVSMPSPSDSPNSIKVCCEGYTGTVEDGCPTPVCDSPCLNGGTCAAPNHCICPKAYTGQTCDTLKREFVWSSWANVNQKPLLDSFQMTLNLYHIRDEVEACKNVVPEDIECRTRENHMDHTQTGQVVTCDRRSGFKCRNDEQPYGEPCLDYEVRILCPVKDQVTKRGFTCIHETLEYNVGEVVKEGDCSACECQSDGRWNCHRDNHFCDRVRTGQCVVGERVFNHGDTTTLDCKMCTCDTTTGWSCVNIDDHTCVAPPEDDYCRIDNHFIFFHGQTAKKDCNTCICKNREWDCTQMICPDKTNKAAYFHKCTNPLTNERHNDGEIIKRDCNVCVCTQGKWDCTRDPCVEGTSLESEYSLANR…	SP(Sec/SPI)	0.998846
oki.162.19	Pancreatic triacylglycerol lipase-like [Apis florea]	Signal, POLXc, CHAD, ORANGE, DM6, DTW, LRRNT, PTN, WSC, ZnF_C3H1, ZnF_NFX	MSGLHCHLITASLVISLMCIMEVCTEVCFKDSSGAVNSELCFSNRLGCWAEDPKLYPRKPSEQDNHFFLYTRNNADSVELKWDDASSLGAFDAQRRTVVVAHGFRSSPDRKGFKGIREAVLREAVSPMCGVPHSPLSSRLSQHLETGPKPVAQCRMVRRAVPCSSSRPNPPRLAPSVWCNQKANQSHCLQLYPDGAVEAPSLSDVNVIMVDWRKAAAGLLKYPQCRVNSRLVGRQLGILLKLLHDHRNLDYAHVHIVGHSLGAHLSGLAGKYLGGQVGRITGLDPAKPDFKDYTHIPDCILDKTDAQFVDIIHSDRGHSVYGLQTAIGHQDFYPNYHKFNQIGCNYFNTLTGCAHTRAVDFFIASVEHLRDPSTECDYSTKPCDGSNCPSSGCPKMGIE…	SP(Sec/SPI)	0.936188
oki.8.264	Phospholipase A2 AP-PLA2-II; [Acanthaster planci]	Signal, PA2c	MKTFLILAMAVALAKAQSTDEITNLVQFGKLVMCLGNIGYTEGLEYDGYGCFCGKGGKGTPVDATDRCCEVHDNCYGQAVEEGKCWSVETYGTTYWYDQSTSGSCSIRCWEEGDYNSLVPRKACKAAICECDRKAAQCFADNRPTFNRKYLNYAKDTC	SP(Sec/SPI)	0.999852
oki.8.261	Phospholipase A2 AP-PLA2-II; [Acanthaster planci]	Signal, PA2c	MKTFLILAMAVALAKAQSTDEITNLVQFGNLVMCLGNIGYTEGLEYDGYGCFCGKGGKGTPVDATDRCCEVHDNCYGQAVEEGKCWSVETYGTTYWYDQSTSSGSCSIRCWEEGDYNSLVPSKACKAAICECDRKAAQCFADNRPTFNRKYLNYAKDTC*	SP(Sec/SPI)	0.99986
oki.8.262	Phospholipase A2 AP-PLA2-II; [Acanthaster planci]	Signal, PA2c	MNFLVVIVTTVSLAGAASAGEIQNLYQFGKMVMCLGNLNVLEGLEYNGYGCYCGRGGKGTPLDDTDRCCKQHDECYERATDEMGCWSIETYATTYDYTKSKVSGKCTIKCSSEEGKVHKRKLISPDDNTISRRVRPECQNDVPIWTLSLPTELESDYSRFTIRKKCKAFICECDRIGAQCFADKRSTFNRSLISYTKDKC*	SP(Sec/SPI)	0.999262
oki.27.35	plancitoxin-1 isoform X1	Signal	MPSSVIMFTFLALTVLTAVMVGTSEAVSCMDNKNKPVDWFIVYKLPQDSASSKPVIREGYGQMYMDVNNQALKFSSTSLKDDDHAIAYTVDDIYKNHGKGNLAHVMYNDQPPAGEEIQSGLVGHTKGVLAFDGTSGFWLVHSVPKFPLPASKSYNWPDNAKRNGQTLLCITFKYDQFEKIGQQLKYNYPGVYDSDLPSKLVGKTPSIVDLVKNVHVTSPPWNRQLNLQSKSGQTFVSFNKASKWGEDLYKNWLATHFKSGLYCETWQNGGRNLNSSCEAGLNVYNVKKVSLSGGSDFKGTKDHSKWAVTTKSGLKWTCIGGINRQTSQMYRGGGAVCLENANVHKAFYDSVAEYEPCT	SP(Sec/SPI)	0.990988
oki.111.24	Uncharacterised protein	Signal, SapB,	MFRTLVVVLLATVAVSVFGKDYPVSKDCNDDPAGCKICVQTYQFMKDSLMNAAFVRTNIEYCKLCTCPFVPKGQPEHGACVDHFNEIYGHVKLFVSMYLDDTRKYCGYICPSARNSSLPSCQPKAVQLREGDTCVLNEDGPVCGVCTGTVVWLKEMLLNKQLIMTADVYLNFYCDLAASPCVRQICRQYVREMNKLAMALGTVLDAKSVCQPMCSSSVTVHTPNLAGAIADFLRHVTEVMDVVAGK*	SP(Sec/SPI)	0.997851
oki.36.13	Vitellogenin 2 [Patiriella regularis]	Signal, LPD_N, DUF1943, VWD	MRQLLLLLVGVAFVHAAVVPSQERYFAAGREYVYHYEGQVVSGIPGVSKEVAGIKIITDVHIHMMADNKCLLRFEQVQLAKIQTETEDPAKQLTVDKLQRLPQEIETPLLEQLVKPIEFRYLNGKVFHIVISQNEPVWASNIKKGVLELMLVNIQGTDDLNEPETQRTQPSNILHQKKHYRVMERGIAGYCQSVYKVKISDSRPHIINKEVQPQRFVLNITKTRDLLECQQRTQRSKLSLLSSKKCEKCKGWETSPATEPFSEFRKPNEKKEELLKCLSQVRYSISLKDHSKFVIDAVVAEGKHIFQPFGQKGGKAVAFVNQTFVLKSTREIPQDEFIPDVENPKDQAEDLTFVFEAWTEHEHDSEEDRERTEEDGPHMSQIRTKVKTYLQKIQDNIKK…	SP(Sec/SPI)	0.999052
oki.36.14	Vitellogenin 2 [Patiriella regularis]	Signal, LPD_N, DUF1943, VWD	MRQLLLLLVGVAFARAAVVPSQERYFAAGREYVYHYEGQVVSGIPGVSKEVAGIKITTDVRIQMMADNKCLLRFEQVQLAKIQTETEDPAKQLTVDKLQRLQQEIETPLLEQLVKPIEFRYFNGKVFHIVISQNEPVWASNIKKGVLELMLVNIQGTDDLNEPETQRTQPSNILHQKEHYRVMERGIAGYCESVYNVKISDLVPDIIDKEVQPKRFVLNITKTRDLLECQQRTQRSKLSLLSSRRCEKCKGQETSPAPEPFSEFRKPNEKKEELLKCLSQVRYSISLKDHNKFVIDAVVAEGKHIFQPFGQKGGKAVAFVNQTFILKSTREIQDEFIPDVENPKDQAEDLTFVFEAWKKHEHDSEEERELTEEDGTHMRQIRTKVKTYLQKIQDNIKKD…	SP(Sec/SPI)	0.998577
oki.1.63	Pentraxin fusion protein-like [Acanthaster planci]	Signal, FTP	MLRSLAAVVLVLGLVGFQMTTAWNGDKLDLLERVLKEEVEESKKSGDSTNLPIVGKITWQSSTLGAYSSNKAVDGSSSSNLYPSQHCSHTITAARDPWWMVDLGSNHCISKVRILNRGDCCSERLEGAVVRVGPSVTGTENWACGSPVTAAQAAPSGGTIEFTCYPALKGRYVSVDIPGSATLQLCEVTLEEIPLSQCPVPQPFNVVGKTAEQSTTHGAGYTADLAVDGSSSAILYPARHCSHTVTNSNHPWWKVDLGGEQCVTKVTILNRGDCCSDRLQNAIVRAGTSETATANQACGAPITASQAQPLGGTIEIKCDRPLRARYVSVDIPGTATLQLCEVSVEVLSSPDC*	SP(Sec/SPI)	0.973703
oki.27.33	Plancitoxin-1 [Acanthaster planci]	ML, CPW_WPC	MSGAVWCSTAPDYTDTLDMARLKTVQCASAPALATVTDQACLMTRMIMFMLLAVTVFTTITVGTSEAAVTCLDGSEKPVDWVGLAGELLDQLWIYMAGFAFATGVLAFDGISGFWLVHSVPKFPLPASKSYNWPDNAKRYGQTLLCITFEYDQFEKIGQQLKYNYPGVYDSQLPSSLAGDNPSIKDVINGVHVTVAPWNRELSLQSKDGKIFISFNKASKWSLDLYKDWLAHYFKSGLYCETWQNGGRNLNSSCEAGLNVYNVKKVSLKGGSDFKGTKDHSKWAVTTKSGLQWACFGGINRQTSQMYRGGGAVCFEHPDVHKTFYDCVAEYEPCT*	SP(Sec/SPI)	0.6212
oki.185.68	Vitellogenin [Parvulastra exigua]		MKLLLFLVGIALANAATTIIQNNDLEKSITIHRNAPETYPTEFQLSKTHRFNYTGDIRTSFPQTGNETVGQRLQCIVEIYPLTTTLWNMRLVNPTIYEINGTHDKPQWMVNSTKVTEELRELLQYNVSILINQGKIEAVFVNKSEAEWIVNLKKGIMNMISLTVEKDNVYEVDEEGVSGICKTLYTIKENKNEDLVTIMNITKVRDLTNCSKTAFNKLMTFKAKDCDDCEKSKDSMEALATFKYNITGTKQRYIINSVQSDAHYVFFPMGVKGGSVLVHVNQTLKLINVTSDPYFEKSPTQESRGGLTYLFPEIVKVEEDMLNTVQKVDFMLKKLEKQTNSSLTIDSPSYFLLLVRSLFEANYETLEDIWNLVRHKPEQRKWLIEAIPFVNRPDMTLLI…	SP(Sec/SPI)	0.8955
oki.164.18	Act protein isoform X1 [Ciona intestinalis]	Actin	MSAFEDDDICPLVVDNGSGMCKAGFAGDDAPRAVFPAVVGRPRHEVMMVGMGKKDSYIGDEAQSKRGILTLKYPIEHGIVTNWDDMEKIWHHTFYNELRVAPEEHPVLLTEAPLNPKANREKMTQIMFETFNVPAMYVSIQAVLSLYSSGRTTGVVFDSGDGVSHVVPIYEGYSLPHAIQRLDLAGRDLTDYLMVILSERGYAFSSSAEREIVRDIKEKLCYLALDFDQEMVTAQSSSSVEKSYELPDGQTITIGNERFRCPEVLFQPSLIGMESAGIHEVLYNSVMKCDMDIRRDMYANVVMSGGSTMFPGTADRMSKELTALVPPSSKVKIIAPPERKYSVWIGGSILASLSTFGQMWISKQEYDENGPGIVHRKCF*	OTHER	0.000809
oki.90.29	Actin, cytoplasmic [Pisaster ochraceus]	Actin	MCDDDVAALVIDNGSGMCKAGFAGDDAPRAVFPSIVGRPRHQGVMVGMGQKDSYVGDEAQSKRGILTLKYPIEHGIVTNWDDMEKIWHHTFYNELRVAPEEHPVLLTEAPLNPKANREKMTQIMFETFNTPAMYVAIQAVLSLYASGRTTGIVFDSGDGVSHTVPIYEGYALPHAILRLDLAGRDLTDYLMKILTERGYSFTTTAEREIVRDIKEKLCYVALDFEQEMHTAASSSSLEKSYELPDGQVITIGNERFRSPEAMFQPAFLGMESSGIHETTYNSIMKCDVDIRKDLYANTVLSGGSTMFPGIADRMQKEVTALAPPTMKIKIIAPPERKYSVWIGGSILASLSTFQQMWISKQEYDESGPSIVHRKCF	OTHER	0.000844
oki.90.35	Actin, cytoplasmic [Pisaster ochraceus]	Actin	MVAFMDTILKGVMVGMGQKDSYVGDEAQSKRGILTLKYPIEHGIVTNWDDMEKIWHHTFYNELRVAPEEHPVLLTEAPLNPKANREKMTQIMFETFNTPAMYVAIQAVLSLYASGRTTGIVFDSGDGVSHTVPIYEGYALPHAILRLDLAGRDLTDYLMKILTERGYSFTTTAEREIVRDIKEKLCYVALDFEQEMQTAASSSSLEKSYELPDGQVITIGNERFRDPEALFQPSFLGMETAGIHETTYNSIMKCDVDIRKDLYANTVLSGGSTMFPGIADRMQKEITALAPPTMKIKIIAPPERKYSVWIGGSILASLSTFQQMWISKQEYDESGPSIVHRKCF*	OTHER	0.003225
oki.12.137	Actin, cytoplasmic [Pisaster ochraceus]	Actin	MCDEDVAALVVDNGSGMCKAGFAGDDAPRAVFPSIVGRPRHQGVMVGMGQKDSYVGDEAQSKRGILTLKYPIEHGIVTNWDDMEKIWHHTFYNELRVAPEEHPVLLTEAPLNPKANREKMTQIMFETFNSPAMYVAIQAVLSLYASGRTTGIVFDTGDGVSHTVPIYEGYALPHAILRLDLAGRDLTDYLMKILTERGYSFTTTAEREIVRDIKEKLCYCALDFEQEMQTASSSSSLEKSYELPDGQVITIGNERFRCPETLFQPAFIGMESAGIHETTYNSIMKCDIDIRKDLYANTVLSGGTSMYPGIADRMQKEIQALAPPTMKIKIIAPPERKYSVWIGGSILASLSTFQQMWISKQEYDESGPSIVHRKCF*	OTHER	0.000921
oki.3.171	Actin, cytoplasmic A3a isoform X1 [Bactrocera dorsalis]	Actin	MCDEETAALVIDNGSGMCKAGFAGDDAPRAVFPSIVGRPRHQGVMVGMGQKDNYVGEEAQNKRGILTLKYPIEHGVVTNWDDMERVWHHTFYNELRVAPEEHPILLTEAPLNPKGNREKMVQIMFETFSSPACYVAIQAVLSLYSSGRTTGIVLDSGDGVSHTVPIYEGYALPHAICRLDLAGRDMTDYMTKIMTERGYSFTTTAEREIVRDIKEKLCYVALDYEQEMKISIGSSSIEKSYELPDGQIITIGK*	OTHER	0.000931
oki.14.161	ATP-dependent RNA helicase DDX20-like [Saccoglossus kowalevskii]	DEXDc, HELICc	MIVQAKSGTGKTCVFSVIILESLDLQCAGVQALVLTPTREIATQVQGVIQSIGRAMQGLRCHTFIGGTLFGPDRQKLKKCHIAVGTPGRVKQLIEYDVMRTESIRLLILDEADKLLDDKFQDQINWIYNHLPVNKQMLALSATYPEALAKGLTSYMRDPTFVRLNPRKVALKGIKQFYKVVPSHGLYHKAFEVKVEHLLQLLTRVSFSQCLVFSNLSSRAQNLSDILCDRGWPSTCISGNQDQVQRHSAMSMLKTFKCRVLISTDLTARGIDAENVNLIVNLDVPSDGKTYMHRIGRAGRFGSKGVAVTFASEGNEETLLRNIQKQCHVSLQLLPDPVPSDLVNSISVDRSCIDTEEESTSGFECDSDSQDNPDIDAEIGMEELQCVSGAREASDKVVK…	OTHER	0.082381
oki.90.30	Beta-actin [Patiria pectinifera]	Actin	MCDDDVAALVIDNGSGMCKAGFAGDDAPRAVFPSIVGRPLHQANITLTILIKNFTLFVDNKPVMVGMGLKDRYVGDEAQSKRGILSIKYPIEHGIVTNWDDMEKIWHHTFYNELRVGPDEYSVLLTEAPLNPKANREKMAQTMFETFNTPAMYVAIQAVLSLYASGRTTGIVFDSGDGVSHTVPIYEGYALPHAIFRLDFAGGELTDYLMKILTERSYRLFTTAEREIVREIKEKLCYVAVDFEQEMQTAASSSSLEQSHKLPDGQVITIGNERFRTPEALFQPALLGEEFPGIDGTIYNSIMKCALDIRRDLFTSIVLSGGSTMFPGIADRMQKEITALAPPDLEIKIITPPERKYSVWIGGSILASLSTFQQMWISKQEYDESGPSIVHCKCF*	OTHER	0.000826
oki.8.30	Carboxypeptidase D-like [Saccoglossus kowalevskii]	Zn_pept	MRKKSRWSSLTPLRINECNSVMTSGRAVHFLLFVISCGVCALPIVKFEYHNHAQLTSVMTSLTNMYPDTSHIYSIGKSVQGRDLWAVAVAGKKPHGRIIGRPEAKYVGNMHGNEAVGREVLLHLIEYLLKEYRGGNPQIRKLMDTTRIHIMPSMNPDGFEVSKQRCRGVDLRANSNGYDLNRNFPDYFEPTVDPIQPETKAVVDWIHGNKFVLSANFHGGALVANYPYDTGQPGTERPMDTAYHQSPDDDVFRFLAKTYSKAHPRMHLVQENICSPNTDTGFVDGITNGADWYSVAGGMQDFNYIFGGCMEITVEMSCCKYPAASELRAYWEENRSPMLEFLKQANRGVKGQVFNTDNRPIEGASVSIVELKSPHPQFTTSLGEYWKILLPGSYTLLVS…	OTHER	0.131262
oki.23.4	Carnitine O-acetyltransferase [Pteropus alecto]	Nothing	MLSSVARHIMRQSANIGPMMKAAEKTAVMLGRKQAQPGRMFAHQQSLSRLPVPPLQQTLYKYLLAIKPILSEEDYEATKKIVTEFGKPGGYGESLQMALIERSQKMDNWLSEWWLHKAYLEFRSPVVIHVSPGVVFPRENFRGVDGQLEFSARFIAGVLDFKQLIDSDSLPVDYMGGQPLCMDQYHRILSSCRVPGVKKDSVATFPPYKPDAPRHIIIGHNNHLHRSSVVVKTMRKTMRKTMHMTMHKTMRKTMHKTRHKTRHKTMHKTRHKTMHKTRHKTRHKTRHKTRHKTMHMTMHKTRHKTMHKTMHKTRHMTMHKNRLFSLDVYDSQGKPLPISEIHTKLKEIVAASPFPAVPVNILTSEHRNTWGKIYKKMSKDKVNRASFEEIKRSIFMLSL…	OTHER	0.000923
oki.62.176	Cleavage stage histone H2B [Psammechinus miliaris]	H2B	MTKASSRGMGTGEKKAAAKVKAPTATMAGSGKKDKHRKKRKESYNVYIYKVLKQVHPDTGISSRAISIMNSFVNDIFERIASEASRLAQYNKKSTISSREVQTAVRLLLPGELAKHAVSEGTKAVTKYTTTR*	OTHER	0.000901
oki.27.48	Disabled homolog 2-interacting protein [Strongylocentrotus purpuratus]	PH, C2, RasGAP, DUF1866	MNESCGSVFVEEVDEEKEGPARAEGWIKVFEEGIIKYCRRGSYNFLSSLRWQLQFCVLDFKASKLHHFNNELEAALVQENAGSPMVRLNPSRVDYYSRWNHVSMSHLGPNFLKTESSTLPRKLPNYDRLDVSQDGVGRARRKSAPSGGIQMTTDATGQQSKLSGIFPKRMKIALKRTKSVGKFDNKHATLKEEDEESDMTSPNSIKPAHSHESLLLGPQTSLDVFDLSSNDLVIVPLHSSILGQDHCFQITNSHGKKYYSCRSASERDKWMESIRSAIHPEKDHKRRKDSVLRLWVVEGKNVPVKRKYYCEICLDDMLYARTTAKSRGDMVFWGEQFLFTCLPEAKNIKVHLYKEPDKKKRRDKNYVGVVSIPLEPISNRATIEKWYPLTNTSTKGDTP…	OTHER	0.000532
oki.226.28	Disco-interacting protein 2 homolog C-like, partial [Strongylocentrotus purpuratus]	DMAP_binding	MAEQRLDASKLPVHIREKLSELEQELKEGDITHKGYEKKKHKLIEPFMHQLEVSEQASAAAAAKRSGKSRRYEHHEPENRYRSDVREEAVKVALAKHREREMPLPMPSKRQSFHTSAVPIETPPDSDTDDDSRSSTSSLNRLGDRKSGSRPSSAGSFRLPGMEPGFSELVNRQAANGHLGRGGARRLDVASSMASSPMPVAQPPPDVTTSSGYIAARQLDDDEEEDEHDGASYRALPNSKVSAKIQQLLNTLKRPKRKPLQEFFQEDDDELEVTEMDPNAPKPEGNTITPAIGEQLSIPTGLPRNLESALQRYGTAHQKATVVTSLDANGKVNCTLTYGKLLTRANKLAFYLLHKIGSKGEPQLKPGDRVALVFPNSDPAGFITAMYGCLIAGVVPVAI…	OTHER	0.000256
oki.52.136	Dynein heavy chain 6, axonemal-like, partial [Strongylocentrotus purpuratus]	AAA domian	EALISDYSDSGVSAQQVLNDLSEVERDLQLRRLLWESTEEWSRLVDEWTASQFDKLNVDVVQKNVNRFTQTVYMLEKGLPPNEVLPRLKERVIDFKQGMPIMTALRNPALRPRHWQEIQDLIGRHIVRDKNFTLGKFMDLQLFQYKDKINDISTQASNEATLEIMLNKVIDLWQSTDFRLIPHSNRDFMIIAGADDITQQLEESQVTIATIRGSRFVSPIKALVEEWDRKLNVFSRTLDEWMNCQRNWLYLEQIFLAPDIQRQLPSEAKLFAAVDKSWKDIMRRTEDRPNALRAAVAPGVLEILQTNNSNLEKIHKCLEDYLETKRLVFPRFYFLSNDELLDILAQSKNPDAVQPHLVKCFGNIKSLEIVREPKLPPTVRTMISAEGEIILMPKNVRAR…	OTHER	0.000678
oki.12.167	Fidgetin-like protein 1-like [Strongylocentrotus purpuratus]	AAA, FHA domain	MSEATKSESESFILHKWQKCHFDLHGPQASPRVKIDAVTGILQQIYQASAIGRINSDVSCDLTQRYIQAHSSVVDSVNSETESEAWNPSLTPENVKNLPFIQQFLQFSKANAQSNKPDRLNDPLILHQKNCGRQKRLAEPQPSANQPSARDHSANESNGISSSHANKLPVTKTPSQQSQEHQSSFPTVRSMTSSTNTAKYPLGQSSTKQGLWGQGQTDNRQPPQMSTVSRIPNLVVNSRGNYAVTPSVQERPTTIPQSDPTILHNHVPAFSSRSTSNWNQSNGLINENPGPAYDRDIPKSSGFHTHQGYRPSGPTSHVAPPNSLKRKTMFQEVEFQGDGQLPFRTSIPERTGCADGRFNEGQGARHMENDDDTSAVPNAFKTASEQLIIQNQKKYGNRA…	OTHER	0.000679
oki.24.119	Glycosyltransferase-like protein LARGE1, partial [Strongylocentrotus purpuratus]	Zn_dep_PLPC, Col_cuticle_N, PEHE	MNVVRVNKKSLGVAVMLFVVAVVIVKYFLRSQDGWSESKEEVLDFKKKETMADKFLEMERENQMLRKQLSISQAQLQQTYETYQNVKVNGSDDTGTSSNQSTSGSPCQNQQPAVPKCEIIHVAVVCAGHNASREVTNLIKSVLFYRKNPLHFHFLVDEVAHIILKTLFQTWDVPGVKVSFYLAEDFKDEEKVLLLSRGSQPGSGQASGSFGPMELTGKLRSRLWKTRAATIIVKYAMPLVRHGLEESTWHSSQRFPSDADKYNLLFDIGQEENFSNSPCMYSLSPQYQSHWAGLPAIDGACPTWCARRGAMTPRHPLIHLALAFNLASPGRRTSFSWSLCPEFCSFR*	OTHER	0.010392
oki.1.78	Histone H2 A.F/Z [Strongylocentrotus purpuratus]	H2A	MAGGKAGKDSGKAKAKAVSRSARAGLQFPVGRIHRHLKNRTTSHGRVGATAAVYSAAILEYLTAEVLELAGNASKDLKVKRITPRHLQLAIRGDEELDSLIKATIAGGGVIPHIHKSLIGKKGSQKAS*	OTHER	0.000413
oki.152.23	Histone H2A [Asterias rubens]	H2A	MSGRGKGGKQRAKAKSRSARAGLQFPVGRVHRFLRKGNYAERVGAGAPVYLAAVMEYLAAEILELAGNAARDNKKTRINPRHLQLAIRNDEELNKLLSGVTIAQGGVLPNIQAVLLPKKSAAGKGGKKSSQSLEY*	OTHER	0.000922
oki.181.26	Histone H2A [Asterias rubens]	H2A	MSGRGKGGKQRAKAKSRSARAGLQFPVGRVHRFLRKGNYAERVGAGAPVYLAAVMEYLAAEILELAGNAARDNKKTRINPRHLQLAIRNDEELNKLLSGVTIAQGGVLPNIQAVLLPKKTSSKAAK*	OTHER	0.000922
oki.40.48	Histone H2A [Asterias rubens]	H2A	MSGRGKGGKQRAKAKSRSARAGLQFPVGRVHRFLRKGNYAERVGAGAPVYLAAVMEYLAAEILELAGNAARDNKKTRINPRHLQLAIRNDEELNKLLSGVTIAQGGVLPNIQAVLLPKKTASKAAK*	OTHER	0.000922
oki.201.3	Histone H2A [Asterias rubens]	H2A	MTGRGKGGKGKGMGGKARSRSNRAGLQFPVGRVHRFMRKGRYSERIGAGAPVYMAAVLEYLVAEILELAGNAARDNKKTRINPRHLQLAIRNDEELNKMMSGVTIAQGGVLPNIQSVLLPSSKTNKAAKALAAQSQEY*	OTHER	0.000796
oki.13.116	Histone H2A [Asterias rubens]	H2A	MSGRGKGGKQRAKAKSRSARAGLQFPVGRVHRFLRKGNYAERVGAGAPVYLAAVMEYLAAEILELAGNAARDNKKTRINPRHLQLAIRNDEELNKLLSGVTIAQGGVLPNIQAVLLPKKTSKPAK*	OTHER	0.000922
oki.11.111	Histone H2A [Asterias rubens]	H2A	MSGRGKGGKSRAKAKSRSARAGLQFPVGRVHRFLRKGNYAERVGAGAPVYLAAVMEYLAAEILELAGNAARDNKKTRINPRHLQLAIRNDEELNKLLSGVTIAQGGVLPNIQAVLLPKKTSSKATK*	OTHER	0.000986
oki.270.6	Histone H2A.x [Salmo salar]	H2A	MSGRGKVNKKSKSTSRSSRAGLQFPVGRVHRFLRKGKYAHRIGSGAAVYMAAILEYLTAEILELAGNAARDNKKSRIIPRHLQLAIRNDEELNKLLCHVTIAQVYIERCLSETIVLDDYSRKGVAMTHFEGTYKLKSSDNFDVFLCALGVNPLLRTVGNYTKPTLVVTVTKDGTHFLFKQSATAFRKYDLEFDLGVNFEHRTVDGRMVKVSTAFSVCKEFVQRKKMAQFNGKYKLDPDNSQNLEEFMKALGVSEEMRKIGSSVVPEVTIETADGKHFKMTTVTTYTTVVVEFNLGEEQEITTADGRKTKNVYTLDGTTLKHVETPADGNGPTATYDRILNAAGDIEMVMTTGSVVAKRLYKKL*	OTHER	0.000483
oki.11.110	Histone H2B, gonadal [Asterias rubens]	H2B	MPPKPSGKGQKKAGKAKGAPRTDKKKKRKRKESYGIYIYKVMKQVHPDTGISSRAMSIMNSFVNDIFERIAAEASRLAHYNKKSTITSREVQTAVRLLLPGELAKHAVSEGTKAVTKYTTSK*	OTHER	0.001027
oki.181.27	Histone H2B, gonadal [Asterias rubens]	H2B	MPPKPSGKGQKKAGKAKGAPRTDKKKKRKRKESYGIYIYKVMKQVHPDTGISSRAMSIMNSFVNDIFERIAAEASRLAHYNKKSTITSREVQTAVRLLLPGELAKHAVSEGTKAVTKYTTSK*	OTHER	0.001027
oki.40.47	Histone H2B, gonadal [Asterias rubens]	H2B	MPPKPSGKGQKKAGKAKGAPRTDKKKKRKRKESYGIYIYKVMKQVHPDTGISSRAMSIMNSFVNDIFERIAAEASRLAHYNKKSTITSREVQTAVRLLLPGELAKHAVSEGTKAVTKYTTSK*	OTHER	0.001027
oki.13.117	Histone H2B-II protein [Rhabdopleura compacta]	H2B	MPPKPSGKGQKKAGKAKGAPRTDKKKKRKRKETYGIYIYKVMKQVHPDTGISSRAMSIMNSFVNDIFERIAAEASRLAHYNKKSTITSREVQTAVRLLLPGELAKHAVSEGTKAVTKYTTSK*	OTHER	0.001067
oki.16.51	Hypothetical protein SINV_08538, partial [Solenopsis invicta]	Tublin, Tublin_C	MREIVHLQAGQCGNQIGAKFWEVISDEHGIDPTGTYHGDSDLQLERINVYYNEATGGKYVPRAVLVDLEPGTMDSVRSGPFGQIFRPDNFVFGQSGAGNNWAKGHYTEGAELLVDSVLDVVRKEAESCDCLQGFQLTHSLGGGTGSGMGTLLISKIREEYPDRMMTTFSVVPSPKVSDTVVEPYNATLSVHQLVENTDQTFCIDNEALYDICFRTLKLTTPTYGDLNHLVSATMSGVTTCLRFPGQLNADLRKLAVNMVPFPRLHFFMPGFAPLTSRGSQQYRALTVPELTQQMFDAKNMMAACDPRHGRYLTVAALFRGRMSMKEVDEQMLNVQNKNSSYFVEWIPNNVKTAVCDIPPRGLKMSVTFVGNSTAIQELFKRISEQFTAMFRRKAFLHWY…	OTHER	0.003022
oki.9.122	Hypothetical protein X975_16282, partial [Stegodyphus mimosarum]	HLH, DM4, ENTH, LisH, RINGv, Igc1, Telo_bind, Tet_JBP, DUF1719, HormR, GluR_Homer-bdg, GPS, AMPKBI, ZnF_BED, CTD, MAGUK_N_PEST	MEAWNRLLTSARVEPADLFRQILTEVLDDLMDQVSGPSRTEKVKHSLRNISRMYKGGLSRASSQYRPDWSDSANRCAYVFLYLMQHCHLVYSSLQRESNDIIAAWRNMSNMKVCSIGGGPGSDLVGVTTFLREYGIFPPSLECLVLDLYPNWKDTWDTIHQCIPEHFRVKYERCDVVTDVGLASNAHQFIQQADLITLVKFFSAVSAFFRTDQGRSRGNFLRSILREIKPGCLVLYIDNVHDSDTQFEREFASRVGLEKVSQFRGRPTLPFDQYSLTVENYCRVLDFKPMRSCNVIIQLYKKEAVQRFSRLVTPFDYINSGSGRLDNINRPGSLQPRLSFCPSTEGVPMSVPASQFARPALFGWTTRSNQTERKSTPSVNPYDNQQRVPMVVRGTNVLA…	OTHER	0.00108
oki.3.224	L-threonine 3-dehydrogenase, mitochondrial-like, partial [Saccoglossus kowalevskii]	Pfam:Epimerase	MAAMFQWTIRAAFVRLSRRGNKPGLARCLSTTLPAQQDFGSLPSLDNPRVLITGALGQLGQGLAKMLRNKYGRDNVIMTDIIKPPKHILQSGPYYFADVLDFKNVQELIVNERIDWLVHFSALLSAVGEEDVPLAIKVNIQGLHNVMELAKMYQLRIFCPSTIGAFGPESPRNPTPDVTIQRPRTIYGVSKVHAELLGEYYHHRFGVDFRSLRLPGVISGDTTPGGGTTDYAVQIFDEALTSGLFTCYLKPDTMLPMIYIDDCLRAVVEMLEVPEEKLSRRTYNIAAVSFTPQELADEIKKVVPRLDVDYKPDSRQDIADSWPQRFEDSGARTDWGWTHHYDLTALVNVMLAVVGERLGVTTGSEATAKETV*	OTHER	0.000799
oki.42.47	Protein FAM214A-like [Strongylocentrotus purpuratus]	DUF4210	MQTIEYHQQPQTMIAGAGLVTPSGVGLMGQVPDDLEVDDDPRPEPNDLFVDFGMLILEGRKPERSVKGRVEGEHCPPRYPNEIRHRCAPDRVARVFEYHQQPQTMIAGAGLVTPSGVGLMGQVPDDLEVDDDPRPEPNDLFVDFGMLILEGRKPERSVKGRVEGEHCPPRYPNEIRHRCAPDRVARCKQIEAARSYICFLCLNNIPMSIEVLLYPDCCREGEQAGIEMTSTSEETAQTPDQPSPHLLLEQWIIQLLPKRFPDGHSHSHLLFQAVRSFLHFSQISAWLSSTQGRLPKNIVYRVCAPGESFPTSFSSTPEVHTFPILNLSKSSSLRVTVASLPRSQSIPALPCYNAAHSAMGRAARKGGSDRDAEDDDREFSYSFVDPSRERDQRSGEELK…	OTHER	0.007141
oki.127.36	Serine/threonine-protein kinase [Strongylocentrotus purpuratus]	UME, PI3Kc, FATC	MASSYGSASGMAGSNQICLKDAEAAFNKLKNAKSTENTQQALKTCRKSICLVVEKYLTDLQKVSAELSKDASGTPAELSRGASGTPLCIVVLNFLHSCMRQFPNIFARTGLTMSGAIDTAVPMRPQLLVPQDPEYYMCRGLNMWLLSCLTRILNDYFCLALHDQITRVTVSLLHAVKYKDPPSFTELLNEFCRLLTDVSAAVSNNFAAGDVEELDPPLEIEHFVVDGDQLNSSEDQEVLAIYNNSRPITLRYHTNCNLLQLALTKILSEVIPDVTLIRSIHQTPGLWDTLVTQFDAGQYEVKQVTLDVITKLLALNGPPTVDILDKLIHLMLFLLTLFLSGDNLESYEDVVGLEQSLASCFSEFFCLEQHNHHQRLPLSVLEVTMETIARYLPIRGLGV…	OTHER	0.00046
oki.267.11	Sodium-dependent noradrenaline transporter isoform X1 [Orcinus orca]	PSN, UreE_C, UDG, TLC, Proteasome_A_N	MHLSQGLHDLVGLKWDLVLCLLAVMVVLFFSLWKGVKSSGKVSFPDESIAGHWKWVVNPSEKVVWVTATLPYIVLLVLLIHGCTLPGSGKGILYYLTPDFGRLLEAQVWIDAAVQIFFSTGAGFGVHLAYASYNKFHNNIYKDVLFTSAVNSVTSFFAGFVVFAVLGYMSETTGKDIKDVATEGPGLVFVVYPEAIATMDGSVFWSIIFYLMLITLGLDSSFGGLEAVISGLTDRFPKYFKNHRKLLTLGVVVSVFFCALLNVTYGGIYMFVLQERFAAGASLLFVVMLEAIIISWLYGVDNFIDNIKEMLGFKPGIWWRLCWKIFAPIFLTLVFFVSLALSEPLTYDDYVYPPWGQAFGWLLAISSMIFVPIFAVVNVFKAEGDGFKTKLAFLITPKN…	OTHER	0.013183
oki.15.269	Tubulin alpha-3 chain, partial [Anas platyrhynchos]	Tublin, Tublin_C	MGNACWELYCLEHGIQPDGQMPSDTSIGSCEDSFNTFFSETSSGKHVPRAIFVDLEPTVVDEVRTGTYRQLFHPEQLITGKEDAANNYARGHFSVGREKVDEVIDKIRKMADKCTGLQGFLIFHSFGGGTGSGFSALLMEKLAVDFGKKSKLEVAVYPAPQMSSSVVEPYNSVLATHTTLEHTDCAFVVDNEAIYDICRRKLDIERPSYANLNRLIAQVVSSITSSLRFEGSLNVDLNEFQTNLVPYPRIHFPLVTYAPVISAEKAYHEQFSIADLTGACYEPENQMVKCDPRHGKYMACCLLYRGDVVPKDVNAAIANIKTKRTIQFVDWCPTGFKVGINNQPPTVVPGGDLAKVQRAVCMLSNTTAIAEAWARLDHKFDLMYAKRAFVHWYVGEGME…	OTHER	0.0017
oki.16.53	Tubulin beta chain isoform 2 [Strongylocentrotus purpuratus]	Tublin, Tublin_C	MFPPFPPPRNAGSAPLSGGTIPPPPNQLTLPQVDSPGSFIMREIVHIQAGQCGNQIGAKFWEVISDEHGIDPTGTYVGDSELQLERISVYYNRATGGKYVPRAVLVDLEPGTMDSVRSGPFGQIFRPDNFVFGQSGAGNNWAKGHYTEGAELVDTVLDVVRKEAESCDCLQGFQLTHSLGGGTGSGMGTLLISKIREEYPDRIMNTFSVVPSPKVSDTVVEPYNATLSVHQLVENTDETYCIDNEALYDICFRTLKLTTPTYGDLNHLVSATMSGVTTCLRFPGQLNADLRKLAVNMVPFPRLHFFMPGFAPLTSRGSQQYRALTVSELTQQMFDAKNMMAACDPRHGRYLTVAAVFRGIMSMKDVDEQMLNVQNKNSSYFVEWIPNNVKTAVCDIPPR…	OTHER	0.005473
oki.16.50	Tubulin beta chain isoform X1 [Ciona intestinalis]	Tublin, Tublin_C	MREIVHIQAGQCGNQIGAKFWEVISDEHGIDPTGTYHGDSDLQLERINVYYNEATGGKYVPRAVLVDLEPGTMDSVRSGPFGQIFRPDNFVFGQSGAGNNWAKGHYTEGAELVDSVLDVVRKEAESCDCLQGFQLTHSLGGGTGSGMGTLLISKIREEYPDRIMNTFSVVPSPKVSDTVVEPYNATLSVHQLVENTDETYCIDNEALYDICFRTLKLTTPTYGDLNHLVSATMSGVTTCLRFPGQLNADLRKLAVNMVPFPRLHFFMPGFAPLTSRGSQQYRALTVPELTQQMFDAKNMMAACDPRHGRYLTVAAMFRGRMSMKEVDEQMLNVQNKNSSYFVEWIPNNVKTAVCDIPPRGLKMSVTFIGNSTAIQELFKRISEQFTAMFRRKAFLHWYT…	OTHER	0.002682
oki.23.43	Uncharacterized protein LOC110975837 [Acanthaster planci]	SR, IMPDH, CCP, CFEM, Kelch, Mterf	MSLRGYQWEEHLMRLKHGGSDVATSSQLAVSTISRYSTVDVQTFQQDESRVFIGRLCGQSVGDAVNVTVLLNNNPGWEPVKGVVEYFVIDSNYQEGVLCSNKDSNGYATPNCLIESWPNKYDIIIIATAGSVSGIAFTLNAEFYDEGTEAASYVKANLPTRRHAPSNLGASVKELSRKPVILTESVLTFPSVSLGYLEEALISFTWCGNTETHIFAVASTITSVDGESSFAQYMCKTLPCDVGVNNIAHNGDQLPSNTVLTDPMTSKENLYVVVVNWGGPYDEEANKYIGNFFFNADQVRYY*	OTHER	0.001575
oki.98.10	Uncharacterised protein	PreSET, FYVE, PKS_PP_betabranch	EPNLEVVPSKEEQLMQLYSEDLAEMTPQEIAKFLLVDFNSVSASDVMGEGISGSCTTSKQDLSAECCTTLSLEPFLDETAKACASVKVLKKAYGLHIKITAFGSTVYNKEIS	OTHER	0.000615
oki.85.28	Uncharacterised protein		MLLRSPTPSINVVDVPESLDRTLRPDWKGGEWDTVEYTANPYTLQLTQLEGDDEWRLNFAQEDASESFRLCTATDYRGRELGTEQHLSVCLENFSTGYVAPAGCTKPVALVTLADRFSNLRMSGQQVMYCAS*	OTHER	0.001364
oki.28.81	Zinc finger protein 227-like [Saccoglossus kowalevskii]	ZnF_C2H2	MASQDASVTVATKQALQKGHRFGPYKGRLRAADIDDDVPFGAWKIYPKDENDKTYILSSQDPTLPRWLHCIKITKEEAECNITLVQVGFKFYFEMTKDVLEGVEYALRGRRSERPTEDTDEPACQPPPPGKRRGRKPRKEYTPEELQALEERKKKELEERIRRTSTRDRSRRCVECGEKFTSGVLFMRHRGKCGVLKEEDLLTESSDGDENTDDEQEKEPDNEEGKDEENGDSMDVPEEEDGAEGGEGEDEENITQLGEAVDHLIAGMEADEGEDGNPSVLAESGQQDAPVIPNPLLREIGDAPVPLAVTVASPLPVKRPRGRPRKDGRPPIQRKKRGRRKRRKRRRRFDDDDDEDHQPIIKQVKDECLPSQPDPERFPFTCETCQKVFPTKSWFDFHL…	OTHER	0.001414
