# Supplementary material for: Crown-of-thorns starfish spines secrete defence proteins
Source: PeerJ. 2023 Aug 21;11:e15689. doi: 10.7717/peerj.15689 (PMC10448888; doi:10.7717/peerj.15689)
Supplement: Table S3 — Gene IDs (based on OIST COTS genome ‘oki.x.xxx’ and NCBI databases; their similarity also included) and transcriptome-derived sequences (nucleotide and deduced amino acid sequences) obtained from a de novo assembly of spine transcriptomes, are provided. Amino acid sequence, signal peptide cleavage site, and relative expression in tissue transcriptomes based on COTS genome browser for each toxin are included. [file peerj-11-15689-s003.xlsx]

## Sheet: Figure 4
gene_id	Spine_NR_N1	Spine_NR_N2	Spine_NR_N3	Spine_NR_S1	Spine_NR_S2	Spine_NR_S3	Spine_R_M1	Spine_R_M2	Spine_R_M3	Spine_F_M1	Spine_F_M2	Spine_F_M2			Stomach_S2	Stomach_S3	Stomach_S4	NF1_RN	NF2_RN	NF3_RN	RF1_RN	RF2_RN	RF3_RN			NF1_TF	NF2_TF	NF3_TF	NM1_TF	NM2_TF	NM3_TF			NF1_ST	NF2_ST	NF3_ST	NM1_ST	NM2_ST	NM3_ST
oki.27.33	113.39	195.85	335.97	74.25	68.37	96.21	12.99	16.62	94.02	28.3	43.42	18.95			7.62	8.48	4.65	11.4126	15.8003	12.2869	8.67595	12.7637	22.4638			20.2786	28.5525	15.2713	7.688	24.0983	10.3033			24.7879	41.6855	23.4413	14.9666	27.3466	19.9515
oki.27.34	17.85	0	0	0	5.79	0	31.97	53.28	17.7	34.73	31.6	66.92			21.97	30.85	1.41	29.2009	37.8957	48.1512	29.4191	36.4045	68.1214			49.6429	65.6605	53.3783	56.8273	73.0777	32.6032			53.0605	88.3716	68.5218	60.2397	70.4351	39.8606
oki.27.35	82.99	59.53	160.32	30.82	26.98	56.42	48.81	29.43	64.46	30.39	68.95	56.05			12.21	17.23	5.61	14.597	9.67881	4.87478	8.46407	12.9138	11.1141			25.0282	24.1484	8.92623	8.99376	18.6151	20.4592			30.7492	28.0603	16.8792	14.3747	22.2471	26.3606
gene_id	Spine_NR_N1_log2	Spine_NR_N2_log2	Spine_NR_N3_log2	Spine_NR_S1_log2	Spine_NR_S2_log2	Spine_NR_S3_log2	Spine_R_M1_log2	Spine_R_M2_log2	Spine_R_M3_log2	Spine_F_M1_log2	Spine_F_M2_log2	Spine_F_M2_log2	ttest	sig dif	Stomach_S2_log2	Stomach_S3_log2	Stomach_S4_log2	NF1_RN_log2	NF2_RN_log2	NF3_RN_log2	RF1_RN_log2	RF2_RN_log2	RF3_RN_log2	ttest	sig dif	NF1_TF_log2	NF2_TF_log2	NF3_TF_log2	NM1_TF_log2	NM2_TF_log2	NM3_TF_log2	ttest	sig dif	NF1_ST_log2	NF2_ST_log2	NF3_ST_log2	NM1_ST_log2	NM2_ST_log2	NM3_ST_log2	ttest	sig dif
oki.27.33	6.82515	7.61361	8.39219	6.21432	6.09529	6.58811	3.69933	4.05485	6.5549	4.82273	5.44029	4.24413	0.00330997	Yes	2.92979	3.08406	2.21723	3.51255	3.98188	3.61905	3.11702	3.67398	4.48953	0.00315257	Yes	4.34188	4.83555	3.93275	2.94261	4.59086	3.36504	0.00960149	Yes	4.63156	5.38147	4.55098	3.90367	4.77329	4.31842	0.0546634	Yes
oki.27.34	4.15785	0	0	0	2.53356	0	4.99865	5.73552	4.14568	5.11811	4.98185	6.06437	0.924041	No	4.45746	4.9472	0.495695	4.86794	5.24396	5.5895	4.87868	5.18604	6.09004	0.0534505	Yes	5.63351	6.03695	5.73818	5.82851	6.19136	5.02694	0.0233377	Yes	5.72957	6.46551	6.09849	5.91264	6.13822	5.31689	0.0157087	Yes
oki.27.35	6.37487	5.89554	7.32481	4.94579	4.75382	5.81813	5.6091	4.87922	6.01033	4.92552	6.10748	5.80864	0.000427788	Yes	3.60999	4.10685	2.488	3.8676	3.27483	2.28534	3.08135	3.69084	3.47432	3.15412e-06	Yes	4.64548	4.59386	3.15805	3.16892	4.2184	4.35467	0.000288894	Yes	4.94248	4.81046	4.07717	3.84546	4.47554	4.72031	0.00203872	Yes
gene_id	Spine log2(av)	Stomach log2(av)	RNC log2(av)	TF log2(av)	ST log2(ave)
oki.27.33	5.87874	2.7437	3.73233	4.00145	4.59323
oki.27.34	3.14463	3.30012	5.30936	5.74258	5.94355
oki.27.35	5.70444	3.40161	3.27905	4.02323	4.47857
Tissue	oki.27.33	oki.27.34	oki.27.35
Spine log2(av)	5.88	3.14	5.7
Stomach log2(av)	2.8	3.3	3.4
RNC log2(av)	3.8	5.3	3.2
TF log2(av)	4	5.74	4
ST log2(ave)	4.5	5.9	4.4
gene_id	Spine log2 std	Stomach log2 std	RNC log2 std	TF log2 std	ST log2 std
oki.27.33	1.39638	0.377557	0.424023	0.669564	0.448703
oki.27.34	2.37876	1.99308	0.425784	0.369571	0.359118
oki.27.35	0.716903	0.677119	0.513268	0.624385	0.397021

## Sheet: Figure 5
gene_id	Spine_NR_N1	Spine_NR_N2	Spine_NR_N3	Spine_NR_S1	Spine_NR_S2	Spine_NR_S3	Spine_R_M1	Spine_R_M2	Spine_R_M3	Spine_F_M1	Spine_F_M2	Spine_F_M2			Stomach_S2	Stomach_S3	Stomach_S4	NF1_RN	NF2_RN	NF3_RN	RF1_RN	RF2_RN	RF3_RN			NF3_TF	NM1_TF	NM2_TF	NM3_TF			NF1_ST	NF2_ST	NF3_ST	NM1_ST	NM2_ST	NM3_ST
oki.8.260	894.69	1224.61	832.29	1343.29	1280.77	1219.1	852.34	277.83	107.07	1659.97	8.5	46.81			45.16	46.96	18.37	6.14523	1.77344	1.35713	2.54818	1.48601	4.24418			0	0	2.47162	1.92972			2.35541	0	12.4153	2.93052	3.82469	16.8519
oki.8.261	2353.66	6083.81	801.15	1319.55	744.58	14214.7	442.79	94.73	5811.76	4402.07	67.97	1074.26			5.34	8.9	3.26	15.728	12.0657	62.8521	4.96895	14.4886	13.2418			0	0	0	1.94074			4.59305	6.42492	8.87695	3.80968	2.98326	3.28613
oki.8.262	2433.07	2647.41	1012.14	4385.78	3440.58	3122.63	4703.43	1001.42	12.65	3957.42	44.87	8.38			8.5	2.02	7.78	18.4816	1.60028	1.57994	23.0731	5.7666	3.95279			0	1.60645	3.19711	1.74885			1.21872	1.6393	5.13908	9.85588	4.74947	36.6215
oki.8.264	3383.84	3806.64	2465.07	3156.22	3196.79	6368.35	600.59	260.79	3011.81	5123.08	345.14	697.33			0	0	0	17.6675	2.32032	18.3213	1.84939	3.71502	1.69767			0	0	0	0			0	1.82371	0	0	0	1.8426
oki.8.268	80.13	101.04	245.51	137.86	91.82	10.1	107.49	247.62	113.47	228.05	172.4	272.66			0	0	0	470.341	420.036	598.749	240.166	102.869	297.941			488.64	199.792	248.212	72.4369			86.5024	313.215	301.816	117.148	212.557	53.3996
oki.8.269	0	0	0	0	0	0	0	0	0	0	0	0			0	0	0	1.90782	0	0	0	1.8781	0			0	0	0	0			0	0	0	0	0	0
oki.8.270	0	0	0	0	0	0	0	0	0	0	0	0			0	0	0	1.52789	1.53153	1.39898	0	1.53183	1.16668			0	0	0	0			0	0	0	0	0	0
oki.36.73	0	0	0	0	0	0	0	0	0	0	0	0			145.24	130.09	170.84	0	1.98899	0	0	0	1.0854			0	0	0	0			0	0	0	0	0	0
gene_id	Spine_NR_N1_log2	Spine_NR_N2_log2	Spine_NR_N3_log2	Spine_NR_S1_log2	Spine_NR_S2_log2	Spine_NR_S3_log2	Spine_R_M1_log2	Spine_R_M2_log2	Spine_R_M3_log2	Spine_F_M1_log2	Spine_F_M2_log2	Spine_F_M2_log2	ttest	sig dif	Stomach_S2_log2	Stomach_S3_log2	Stomach_S4_lg2	NF1_RN_log2	NF2_RN_log2	NF3_RN_log2	RF1_RN_log2	RF2_RN_log2	RF3_RN_log2	ttest	sig dif	NF3_TF	NM1_TF	NM2_TF	NM3_TF	ttest	sig dif	NF1_ST	NF2_ST	NF3_ST	NM1_ST	NM2_ST	NM3_ST	ttest	sig dif
oki.8.260	9.80524	10.2581	9.70094	10.3916	10.3228	10.2516	9.73529	8.11806	6.74241	10.6969	3.08746	5.54874	0.0249921	Yes	5.49697	5.55336	4.19928	2.61947	0.82655	0.440559	1.34947	0.571441	2.08549	1.99136e-06	Yes	0	0	1.30545	0.948393	1.22701e-05	Yes	1.23598	0	3.63405	1.55116	1.93534	4.07484	1.41003e-05	Yes
oki.8.261	11.2007	12.5708	9.64593	10.3658	9.54028	13.7951	8.79048	6.56575	12.5048	12.104	6.08683	10.0691	9.41257e-05	Yes	2.41684	3.15381	1.70487	3.97526	3.59283	5.97389	2.31294	3.85684	3.72703	1.36865e-05	Yes	0	0	0	0.956606	9.48382e-07	Yes	2.19945	2.68368	3.15006	1.92967	1.57689	1.71639	4.61097e-07	Yes
oki.8.262	11.2486	11.3704	9.98319	12.0986	11.7484	11.6085	12.1995	9.96783	3.66107	11.9503	5.48768	3.06695	0.00387039	Yes	3.08746	1.01436	2.95977	4.20801	0.678326	0.659872	4.52814	2.52772	1.98287	0.000210347	Yes	0	0.683873	1.67677	0.806404	#NAME?	Yes	0.285366	0.713076	2.36151	3.30099	2.24777	5.19462	0.000201632	Yes
oki.8.264	11.7244	11.8943	11.2674	11.624	11.6424	12.6367	9.23024	8.02674	11.5564	12.3228	8.43104	9.4457	3.41494e-08	Yes	0	0	0	4.14303	1.21432	4.19545	0.887052	1.89337	0.763558	8.13686e-09	Yes	0	0	0	0	2.3248e-09	Yes	0	0.866874	0	0	0	0.88174	3.62812e-11	Yes
oki.8.268	6.32427	6.65878	7.93964	7.10706	6.52074	3.33628	6.74806	7.95198	6.82617	7.83321	7.42962	8.09096	5.55007e-07	Yes	0	0	0	8.87756	8.71437	9.22581	7.90789	6.68466	8.21889	0.0329624	Yes	8.93263	7.64235	7.95543	6.17865	0.298959	No	6.43467	8.29101	8.23753	6.87218	7.73171	5.73876	0.603753	No
oki.8.269	0	0	0	0	0	0	0	0	0	0	0	0	0	No	0	0	0	0.931924	0	0	0	0.90927	0	0.0346175	Yes	0	0	0	0	0	No	0	0	0	0	0	0	0	No
oki.8.270	0	0	0	0	0	0	0	0	0	0	0	0	0	No	0	0	0	0.611545	0.614971	0.484375	0	0.615257	0.222412	2.26053e-05	No	0	0	0	0	0	No	0	0	0	0	0	0	0	No
oki.36.73	0	0	0	0	0	0	0	0	0	0	0	0	3.30473e-22	Yes	7.1823	7.02337	7.4165	0	0.992035	0	0	0	0.118223	0.115832	No	0	0	0	0	0	No	0	0	0	0	0	0	0	No
gene_id	Spine log2(av)	Stomach log2(av)	RNC log2(av)	TF log2(av)	ST log2(av)
oki.8.260	8.7216	5.0832	1.3155	0.563462	2.0719
oki.8.261	10.27	2.42517	3.90647	0.191321	2.20936
oki.8.262	9.53259	2.35386	2.43082	0.791762	2.35055
oki.8.264	10.8168	0	2.1828	0	0.291436
oki.8.268	6.89723	0	8.27153	7.67727	7.21764
oki.8.269	0	0	0.306866	0	0
oki.8.270	0	0	0.42476	0	0
oki.36.73	0	7.20739	0.185043	0	0
gene_id	Spine log2 std	Stomach log2 std	RNC log2 std	TF log2 std	ST log2 std
oki.8.260	2.29509	0.625453	0.80131	0.57743	1.39842
oki.8.261	2.26061	0.591554	1.07636	0.414223	0.552459
oki.8.262	3.26748	0.948608	1.52614	0.596234	1.63039
oki.8.264	1.51442	0	1.44961	0	0.412175
oki.8.268	1.22686	0	0.829375	0.987468	0.946576
oki.8.269	0	0	0.434023	0	0
oki.8.270	0	0	0.235329	0	0
oki.36.73	0	0.161475	0.36347	0	0

## Sheet: Figure 6
gene_id	Spine_NR_N1	Spine_NR_N2	Spine_NR_N3	Spine_NR_S1	Spine_NR_S2	Spine_NR_S3	Spine_R_M1	Spine_R_M2	Spine_R_M3	Spine_F_M1	Spine_F_M2	Spine_F_M2			Stomach_S2	Stomach_S3	Stomach_S4	NF1_RN	NF2_RN	NF3_RN	RF1_RN	RF2_RN	RF3_RN			NF1_TF	NF2_TF	NF3_TF	NM1_TF	NM2_TF	NM3_TF			NF1_ST	NF2_ST	NF3_ST	NM1_ST	NM2_ST	NM3_ST
oki.208.17	956.24	894.76	555.21	753.27	713.56	734.78	586.89	72.4	1125.08	970.73	337.46	886.95			0	0	0	3.93814	2.83231	1.49698	3.73255	11.4276	6.21683			4.07129	2.50226	32.3312	5.3058	0	3.53329			2.87515	12.0656	3.03097	5.00803	1.68071	21.599
gene_id	Spine_NR_N1_log2	Spine_NR_N2_log2	Spine_NR_N3_log2	Spine_NR_S1_log2	Spine_NR_S2_log2	Spine_NR_S3_log2	Spine_R_M1_log2	Spine_R_M2_log2	Spine_R_M3_log2	Spine_F_M1_log2	Spine_F_M2_log2	Spine_F_M2_log2	ttest_SPINE_VS_stomach_log2	Sig Dif	Stomach_S2_log2	Stomach_S3_log2	Stomach_S4_log2	NF1_RN_log2	NF2_RN_log2	NF3_RN_log2	RF1_RN_log2	RF2_RN_log2	RF3_RN_log2	ttest_SPINE_VS_stomach	Sig Dif	NF1_TF_log2	NF2_TF_log2	NF3_TF_log2	NM1_TF_log2	NM2_TF_log2	NM3_TF_log2	ttest_SPINE_VS_stomach	Sig Dif	NF1_ST_log2	NF2_ST_log2	NF3_ST_log2	NM1_ST_log2	NM2_ST_log2	NM3_ST_log2	ttest_SPINE_VS_stomach	Sig Dif
oki.208.17	9.90123	9.80536	9.11689	9.55702	9.47889	9.52117	9.19695	6.17792	10.1358	9.92293	8.39857	9.79271	2.06523e-09	Yes	0	0	0	1.97752	1.50198	0.582052	1.90016	3.51445	2.63618	2.715e-10	yes	2.02549	1.32323	5.01485	2.40757	0	1.82101	5.95998e-09	yes	1.52364	3.59282	1.59978	2.32424	0.749071	4.43289	3.19316e-09	yes
gene_id	spine log2 ave	Stomach log2 ave	RNC log2 ave	TF log2 ave	ST log2 ave
oki.208.17	9.25045	0	2.01872	2.09869	2.37041
gene_id	spine log2 std	Stomach log2 std	RNC log2 std	TF log2 std	ST log2 std
oki.208.17	1.02745	0	0.909694	1.51039	1.27082
